# Supplementary material for: RhIII-promoted directed C–H N-heteroarylation of 2-pyridones
Source: Royal Society of Chemistry journal article supplement (doi:10.1039/d3ob00578j), 2023-01-01

# Rh<sup>III</sup>-promoted directed C–H *N*-heteroarylation of 2-pyridones

Rong Chi, Jia-Xue Wu, Da-Cheng Li, Jian-Min Dou, Huai-Wei Wang\*

Shandong Provincial Key Laboratory of Chemical Energy Storage and Novel Cell Technology, School of Chemistry and Chemical Engineering, Liaocheng University, Liaocheng 252000, PR China.

|                                                           |    |
|-----------------------------------------------------------|----|
| 1. Experiments .....                                      | 2  |
| 2. Control experiments.....                               | 2  |
| 2.1 H/D exchange experiment.....                          | 2  |
| 2.2 Competitive experiments .....                         | 4  |
| 2.3 Catalytic activity of <b>intermediate A'</b> .....    | 5  |
| 3. X-ray single crystal data for compound <b>4k</b> ..... | 7  |
| 4. References.....                                        | 10 |
| 5. NMR Spectra .....                                      | 11 |

## 1. Experiments

Table S1 Control experiments

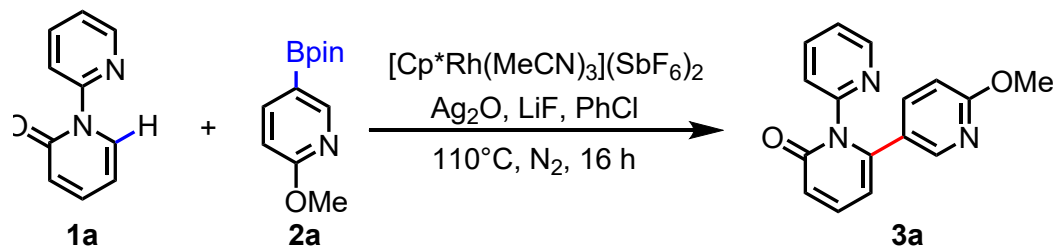

| entry          | Cat.                                                    | oxidant               | base | solvent | yield(%) <sup>a</sup> |
|----------------|---------------------------------------------------------|-----------------------|------|---------|-----------------------|
| 1              | $[\text{Cp}^*\text{Rh}(\text{MeCN})_3](\text{SbF}_6)_2$ | $\text{Ag}_2\text{O}$ | LiF  | PhCl    | 82                    |
| 2 <sup>b</sup> | —                                                       | $\text{Ag}_2\text{O}$ | LiF  | PhCl    | nr                    |
| 3 <sup>c</sup> | $[\text{Cp}^*\text{Rh}(\text{MeCN})_3](\text{SbF}_6)_2$ | —                     | LiF  | PhCl    | nr                    |
| 4 <sup>d</sup> | $[\text{Cp}^*\text{Rh}(\text{MeCN})_3](\text{SbF}_6)_2$ | $\text{Ag}_2\text{O}$ | —    | PhCl    | 71                    |

<sup>a</sup>Conditions: **1a** (17.2 mg, 0.1 mmol), **2a** (47.9 mg, 0.2 mmol),  $[\text{Cp}^*\text{Rh}(\text{MeCN})_3](\text{SbF}_6)_2$  (8.3 mg, 0.01 mmol), Oxidant (0.2 mmol), Base (0.2 mmol) in 2 mL dry PhCl, 110 °C, 16 h,  $\text{N}_2$  atmosphere. Yields were determined by  $^1\text{H}$  NMR analysis with 1,3,5-trimethoxybenzene as the internal standard. <sup>b</sup>Without catalyst. <sup>c</sup>Without  $\text{Ag}_2\text{O}$ . <sup>d</sup>Without LiF.

## 2. Control experiments

### 2.1 H/D exchange experiment

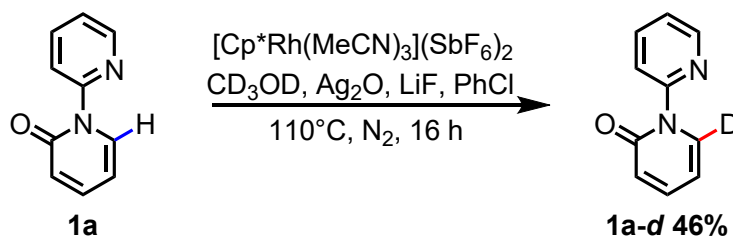

To a 25 mL Schlenk-type sealed tube equipped with a magnetic stirring bar was added the substrate **1a** (0.1 mmol),  $[\text{Cp}^*\text{Rh}(\text{MeCN})_3](\text{SbF}_6)_2$  (8.3 mg, 0.01 mmol),  $\text{Ag}_2\text{O}$  (46.3 mg, 0.2 mmol), LiF (5.2 mg, 0.2 mmol),  $\text{CD}_3\text{OD}$  (10 equiv.) and dry PhCl (2.0 mL) under  $\text{N}_2$  atmosphere. The tube was capped, and subjected to a 110 °C

preheated oil bath for 16 h. After cooled to room temperature, the reaction mixture was filtered through a pad of Celite. The filtrate was concentrated in vacuo to afford crude products. The ratio was identified by  $^1\text{H}$  NMR analysis of the crude product using 1,3,5-trimethoxybenzene as the internal standard.

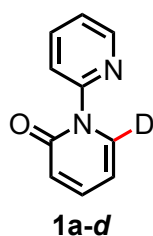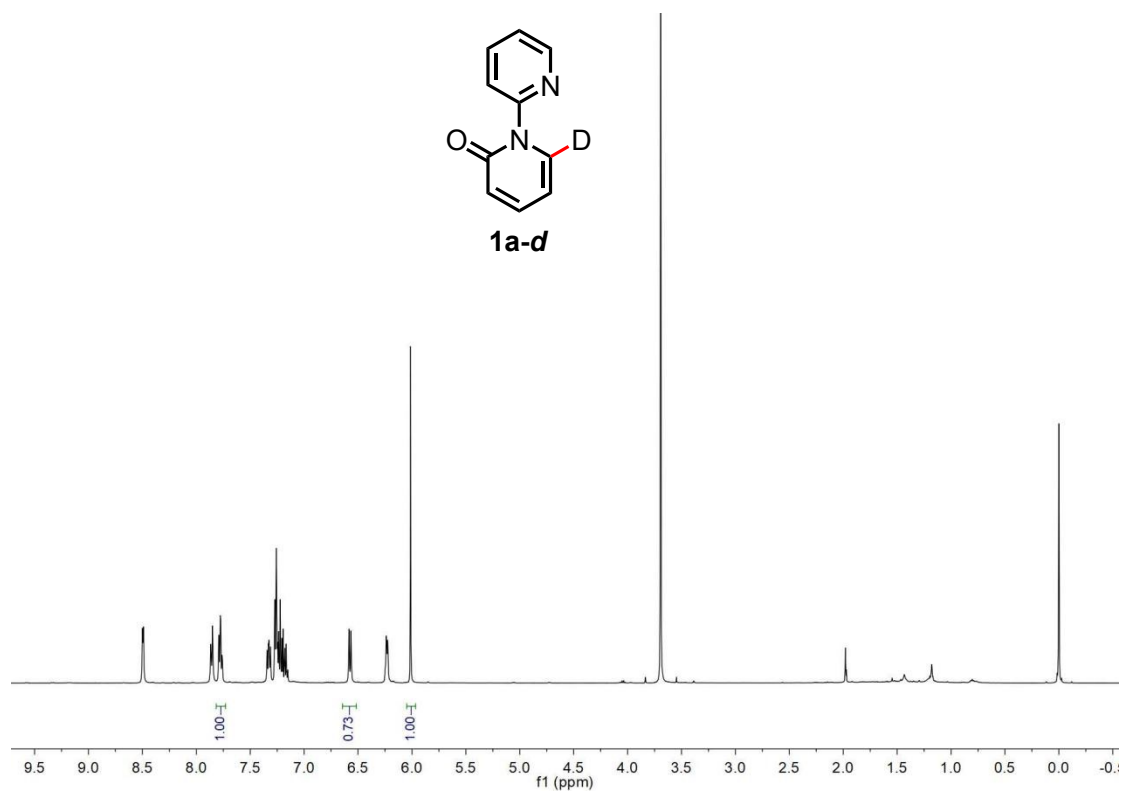

## 2.2 Competitive experiments

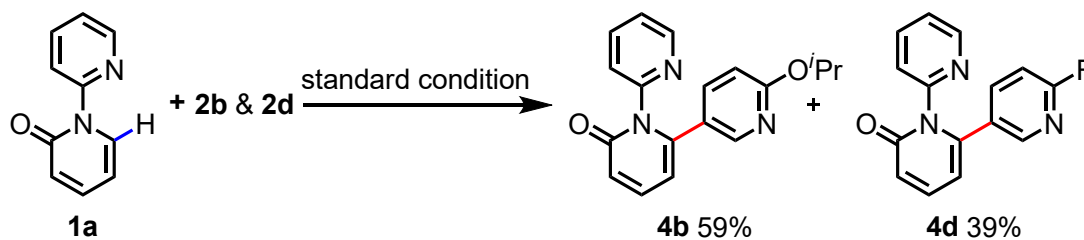

To a 25 mL Schlenk-type sealed tube equipped with a magnetic stirring bar was added the substrate **1a** (0.1 mmol), [Cp\*Rh(MeCN)<sub>3</sub>](SbF<sub>6</sub>)<sub>2</sub> (8.3 mg, 0.01 mmol), heteroaryl acid pinacol esters **2b** (0.2 mmol) and **2d** (0.2 mmol), Ag<sub>2</sub>O (46.3 mg, 0.2 mmol), LiF (5.2 mg, 0.2 mmol) and dry PhCl (2.0 mL) under N<sub>2</sub> atmosphere. The tube was capped, and subjected to a 110 °C preheated oil bath for 16 h. After cooled to room temperature, the reaction mixture was filtered through a pad of Celite. The filtrate was concentrated in vacuo to afford crude products. The yields of the products (**4b** 59% and **4d** 39%) was determined by <sup>1</sup>H NMR analysis of the crude product using 1,3,5-trimethoxybenzene as the internal standard.

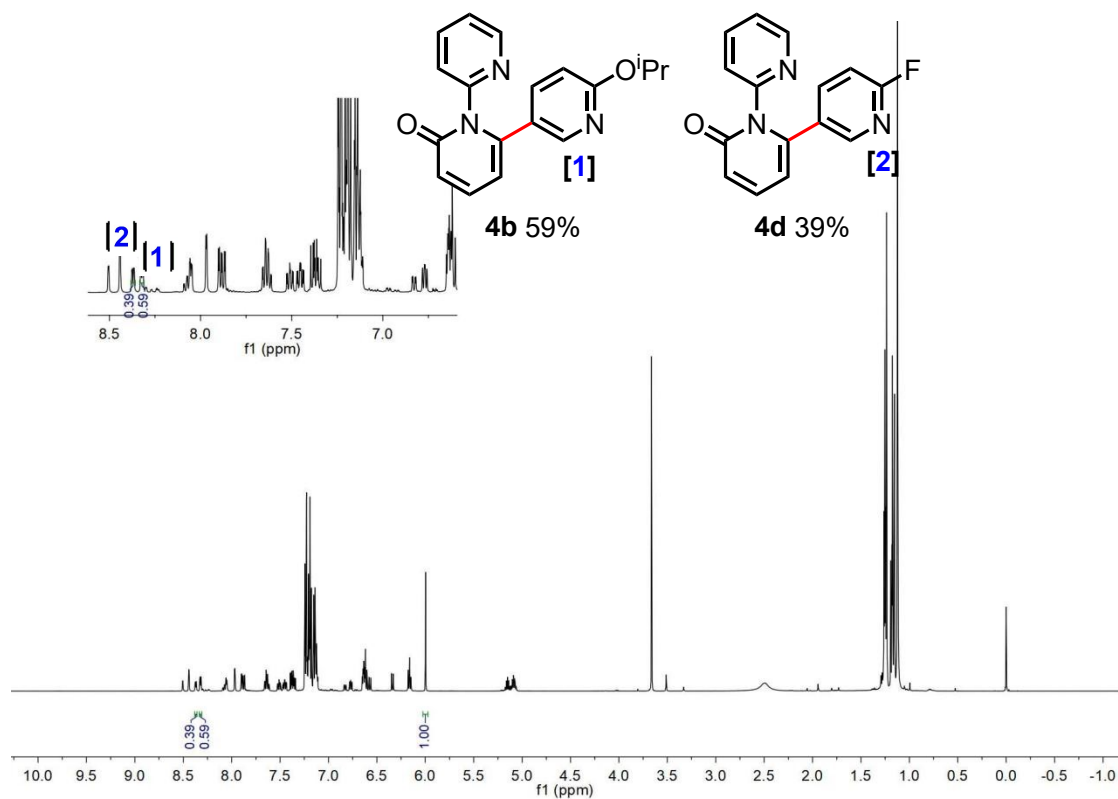

### 2.3 Catalytic activity of intermediate A'

#### Preparation and Characterization of Intermediate A'<sup>[1]</sup>

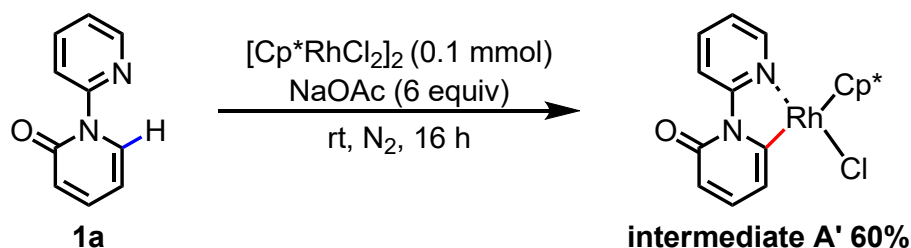

An oven-dried 25 mL Schlenk tube equipped with magnetic stirring bar was sequentially charged with **1a** (36.1 mg, 0.21 mmol), [Cp\*RhCl<sub>2</sub>]<sub>2</sub> (31.2 mg, 0.1 mmol), NaOAc (49.2 mg, 0.6 mmol) were stirred overnight in CH<sub>2</sub>Cl<sub>2</sub> (6 mL) at room temperature. The solvent was then removed under reduced pressure, and the residue was dissolved in CH<sub>2</sub>Cl<sub>2</sub>, and filtered to remove NaOAc. Column chromatography was performed on silica gel using EA/PE = 4:1 to afford Rhodium(III) Complex **intermediate A'** in 60% yield. <sup>1</sup>H NMR (500 MHz, CDCl<sub>3</sub>): δ 9.32 (d, *J* = 9.0 Hz, 1H), 8.52 (dd, *J*<sub>1</sub> = 5.5 Hz, *J*<sub>2</sub> = 1.0 Hz, 1H), 7.82-7.78 (m, 1H), 7.20-7.17 (m, 1H), 7.09 (dd, *J*<sub>1</sub> = 7.0 Hz, *J*<sub>2</sub> = 15.0 Hz, 1H), 6.50 (dd, *J*<sub>1</sub> = 6.5 Hz, *J*<sub>2</sub> = 0.5 Hz, 1H), 6.12 (dd, *J*<sub>1</sub> = 9.0 Hz, *J*<sub>2</sub> = 1.0 Hz, 1H), 1.58 (s, 15H). HRMS (ESI) *m/z*: [M-Cl]<sup>+</sup> Calcd for C<sub>20</sub>H<sub>22</sub>RhN<sub>2</sub>O 409.0787; Found 409.0787.

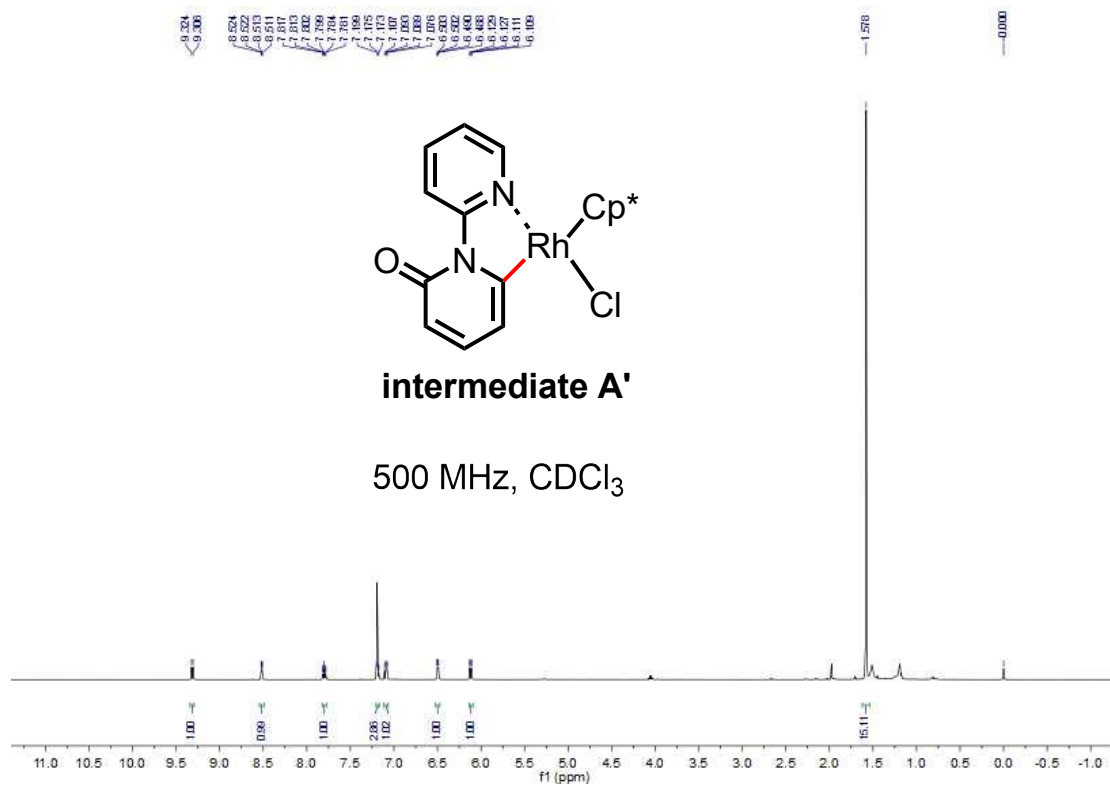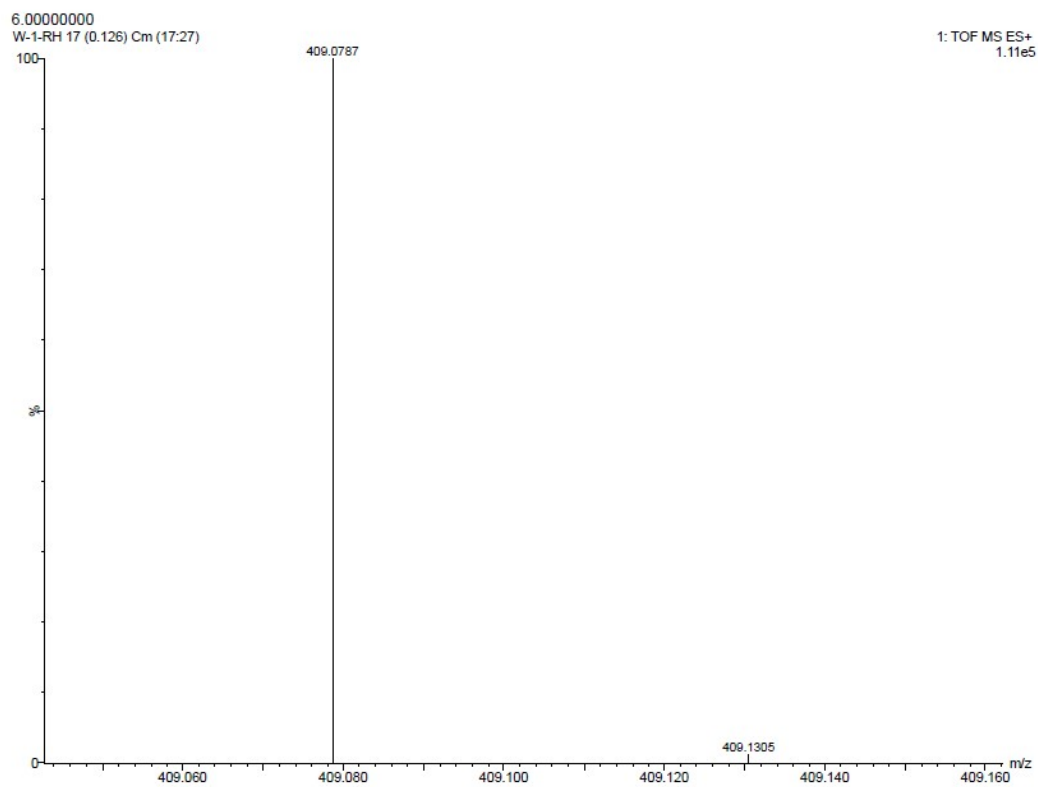

### 3. X-ray single crystal data for compound **4k**

#### General Procedure for Crystal Preparation:

Compounds **4k** (around 20 mg) were dissolved in CDCl<sub>3</sub> (1 ml) separately, and the NMR tube was capped with a closed-top cap. The single crystals were grown by slow evaporation of solvents at room temperature.

#### X-ray structure determination of compounds **4k**:

Single-crystal X-ray data for Cd-CP were collected on a Siemens Smart CCD diffractometer with graphite-monochromatic Mo K $\alpha$  radiation ( $\lambda = 0.71073 \text{ \AA}$ ) at 298 K. The raw data frames were integrated into SHELX-format reflection files and corrected using SAINT program.<sup>2</sup> The structure was solved by direct methods and refined by full-matrix least-squares methods with SHELX program.<sup>3</sup> Displacement parameters were refined anisotropically, and the positions of the H-atoms were generated geometrically, assigned isotropic thermal parameters, and allowed to ride on their parent carbon atoms before the final cycle of refinement. Basic information pertaining to crystal parameters and structure refinement are summarized in Table S1 and selected bond lengths and angles are listed in Table S2. CCDC 2254051 (**4k**) contains the supplementary crystallographic data for this paper.

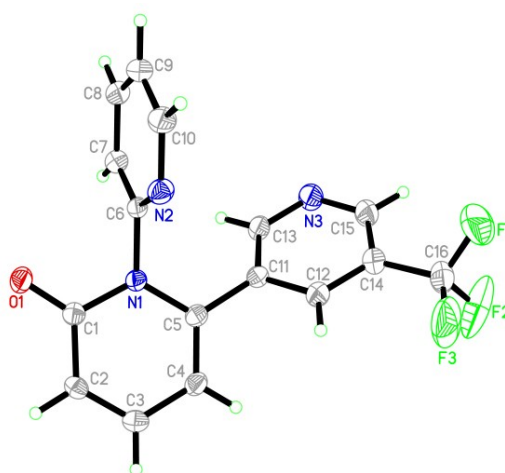

Figure S1. Single crystals of compound **4k**

Table S1. Crystal data and structure refinements for **4k**

|                                   |                                                                 |
|-----------------------------------|-----------------------------------------------------------------|
| Formula                           | C <sub>16</sub> H <sub>10</sub> F <sub>3</sub> N <sub>3</sub> O |
| Formula weight                    | 317.27                                                          |
| T (K)                             | 298.15                                                          |
| Crystal system                    | monoclinic                                                      |
| Space group                       | P2 <sub>1</sub> /c                                              |
| a (Å)                             | 14.5478(12)                                                     |
| b (Å)                             | 9.6153(8)                                                       |
| c (Å)                             | 10.2086(9)                                                      |
| α                                 | 90                                                              |
| β                                 | 101.992(4)                                                      |
| γ                                 | 90                                                              |
| V                                 | 1396.8(2)                                                       |
| Z                                 | 4                                                               |
| Dcalc (g/cm <sup>-3</sup> )       | 1.509                                                           |
| F(000)                            | 648.0                                                           |
| 2θ for data collection            | 5.112 to 50.02                                                  |
| Reflections collected             | 6619                                                            |
| Unique reflections                | 2463                                                            |
| Goodness-of-fit on F <sup>2</sup> | 1.101                                                           |
| R <sub>1</sub> , [I > 2σ]         | 0.0770                                                          |
| wR <sub>2</sub> , [I > 2σ]        | 0.2114                                                          |

Table S2. Bond lengths [Å] and angles [°] for **4k**

|           |          |            |          |
|-----------|----------|------------|----------|
| O1-C1     | 1.223(5) | C3-C4      | 1.398(6) |
| N1-C1     | 1.385(5) | C4-C5      | 1.328(5) |
| N1-C5     | 1.390(5) | C5-C11     | 1.472(6) |
| N1-C6     | 1.440(5) | C6-C7      | 1.364(6) |
| N2-C6     | 1.308(5) | C7-C8      | 1.370(6) |
| N2-C10    | 1.329(5) | C8-C9      | 1.356(7) |
| N3-C13    | 1.324(5) | C9-C10     | 1.351(7) |
| N3-C15    | 1.324(6) | C11-C12    | 1.374(6) |
| F1-C16    | 1.267(6) | C11-C13    | 1.378(6) |
| F2-C16    | 1.272(7) | C12-C14    | 1.368(6) |
| F3-C16    | 1.291(7) | C14-C15    | 1.364(7) |
| C1-C2     | 1.418(5) | C14-C16    | 1.457(7) |
| C2-C3     | 1.341(6) |            |          |
| C1-N1-C5  | 122.6(3) | C9-C8-C7   | 118.9(4) |
| C1-N1-C6  | 117.2(3) | C10-C9-C8  | 119.4(4) |
| C5-N1-C6  | 119.1(3) | N2-C10-C9  | 123.2(4) |
| C6-N2-C10 | 116.2(4) | C12-C11-C5 | 120.1(4) |



|            |          |             |          |
|------------|----------|-------------|----------|
| C13-N3-C15 | 116.9(4) | C12-C11-C13 | 117.5(4) |
| O1-C1-N1   | 120.0(3) | C13-C11-C5  | 122.1(4) |
| O1-C1-C2   | 124.3(4) | C14-C12-C11 | 119.0(4) |
| N1-C1-C2   | 115.7(3) | N3-C13-C11  | 124.1(4) |
| C3-C2-C1   | 121.4(4) | C12-C14-C16 | 121.5(5) |
| C2-C3-C4   | 120.3(4) | C15-C14-C12 | 119.0(4) |
| C5-C4-C3   | 120.6(4) | C15-C14-C16 | 119.5(4) |
| N1-C5-C11  | 119.1(3) | N3-C15-C14  | 123.4(4) |
| C4-C5-N1   | 119.2(4) | F1-C16-F2   | 105.9(6) |
| C4-C5-C11  | 121.6(4) | F1-C16-F3   | 104.0(6) |
| N2-C6-N1   | 114.4(3) | F1-C16-C14  | 114.7(5) |
| N2-C6-C7   | 125.1(4) | F2-C16-F3   | 101.5(5) |
| C7-C6-N1   | 120.5(4) | F2-C16-C14  | 114.3(5) |
| C6-C7-C8   | 117.1(4) | F3-C16-C14  | 115.0(5) |

## 4. References

1. Huang, G.; Shan, Y.-J.; Yu, J.-T.; Pan, C.-D. Rh<sup>III</sup>-Catalyzed C6-Selective Oxidative C–H/C–H Crosscoupling of 2-Pyridones with Thiophenes. *Chem. Eur. J.*, **2021**, *27*, 12294–12299.
2. SAINT, *Version 6.02a*, Bruker AXS Inc, Madison, WI, **2002**.
3. (a) Sheldrick, G. M. *SHELXS-97, Program for Crystal Structure Solution*, Göttingen University, Göttingen, Germany, **1997**; (b) Sheldrick, G. M. Crystal structure refinement with SHELXL. *Acta Crystallogr. Sec. C: Struct. Chem.* **2015**, *71*, 3.

## 5. NMR Spectra

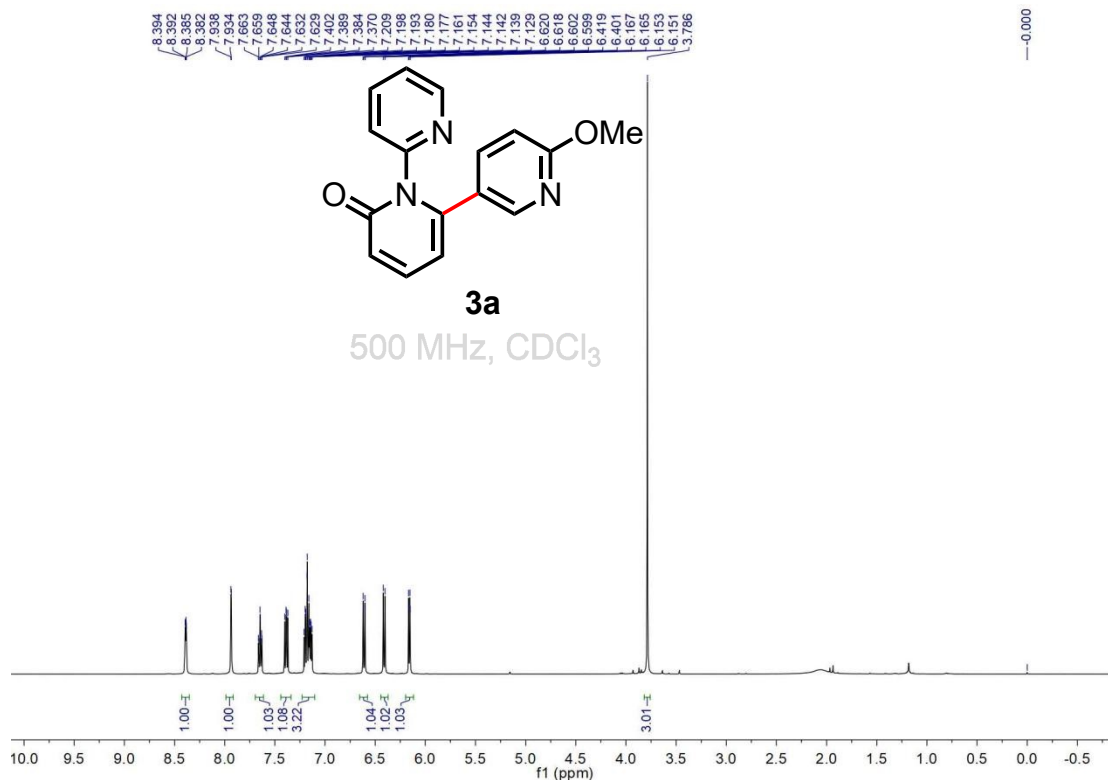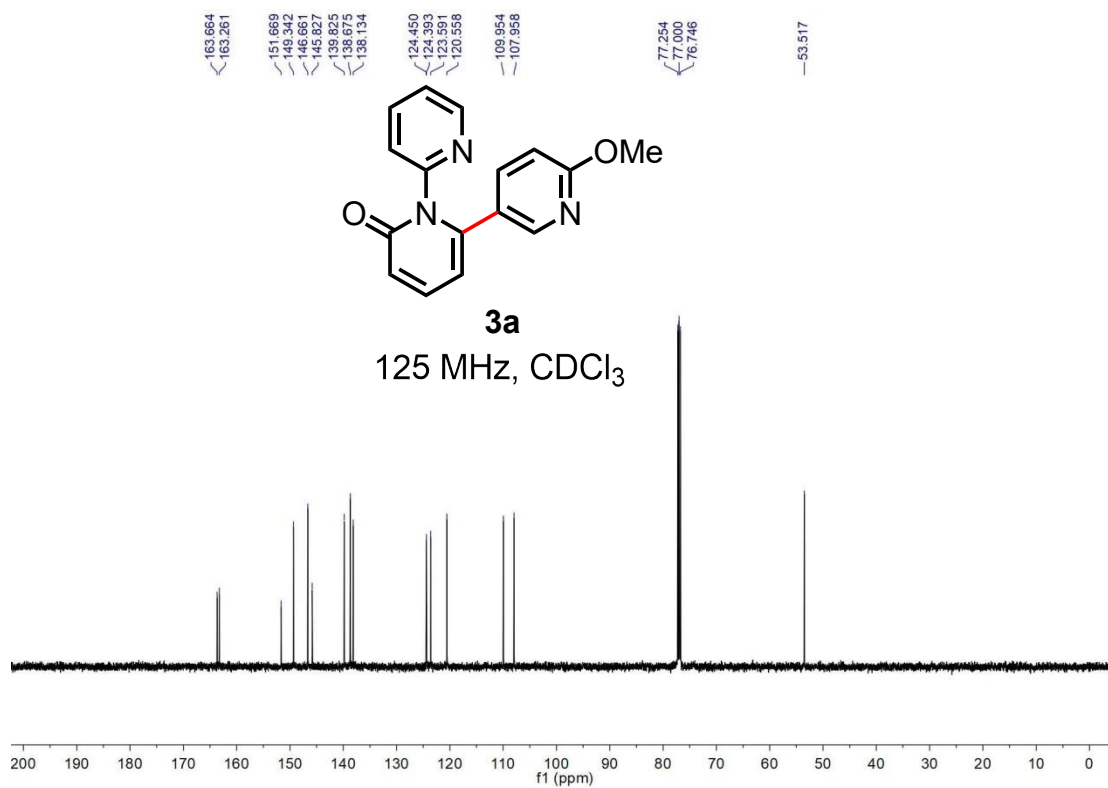

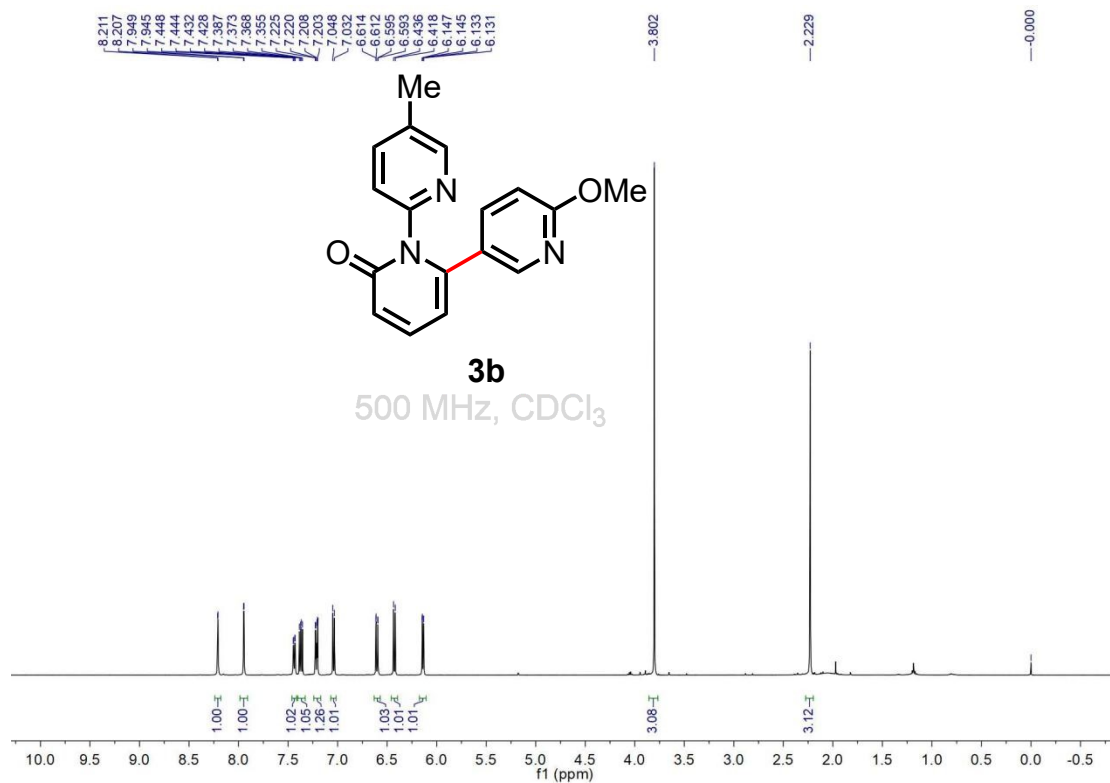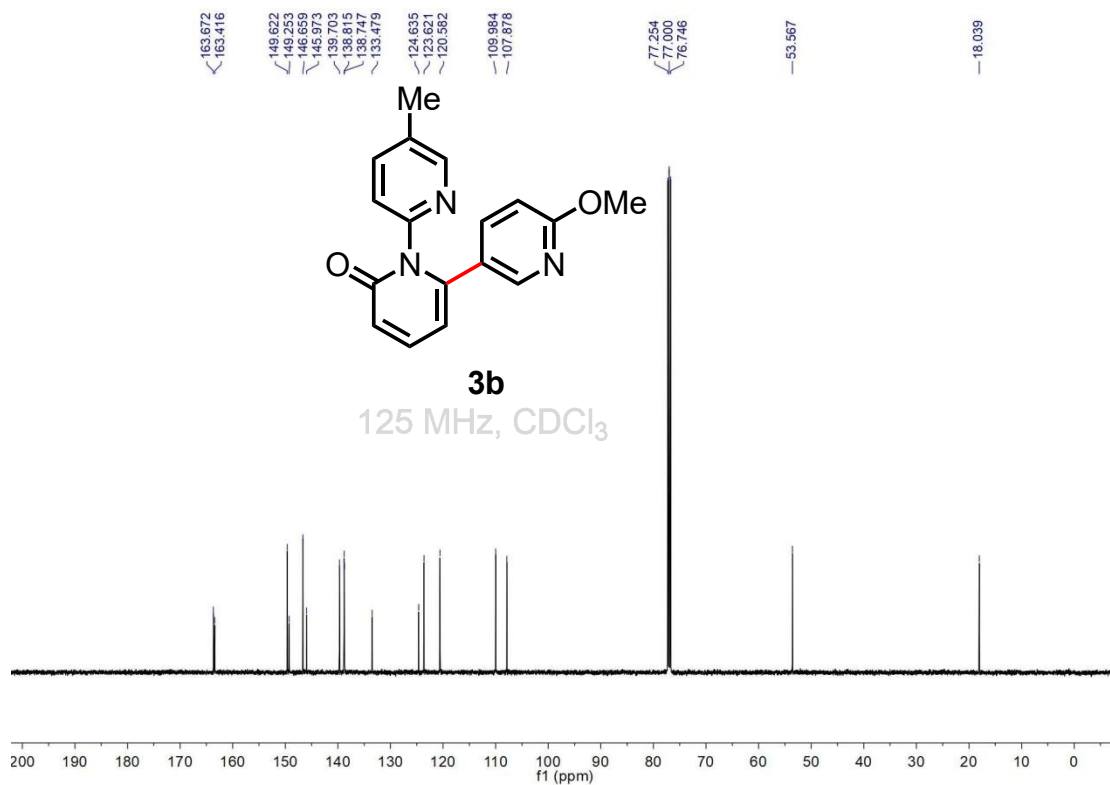

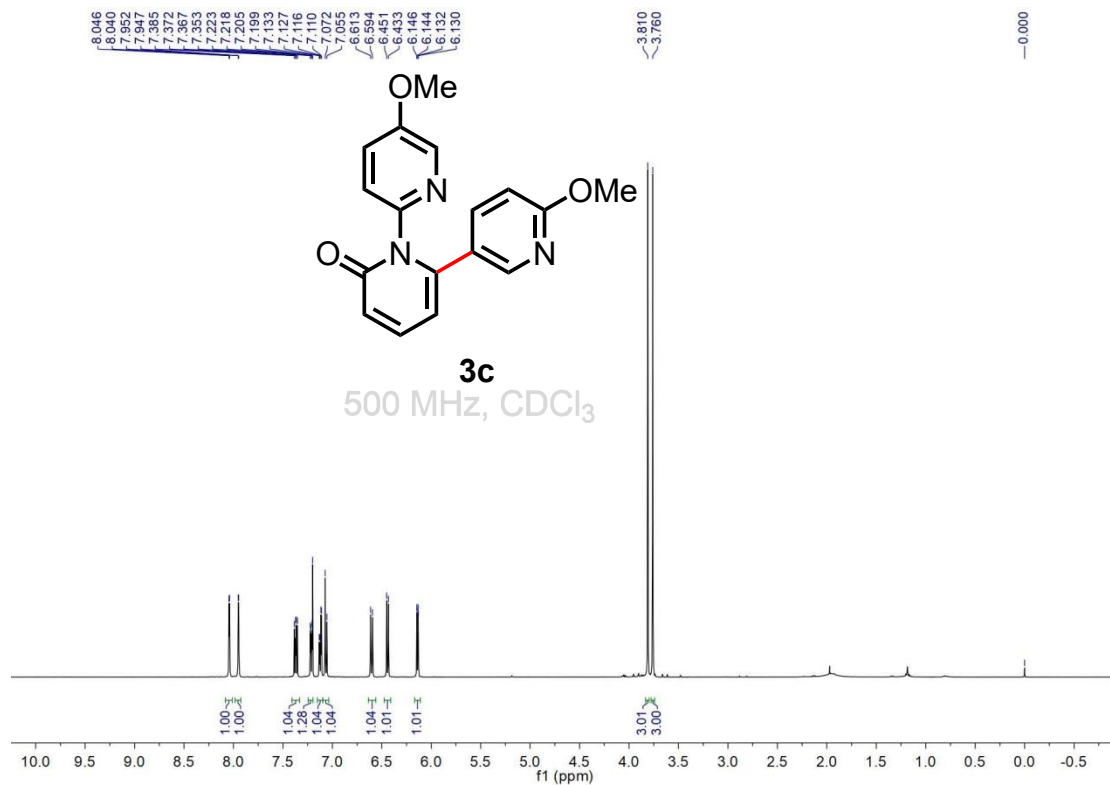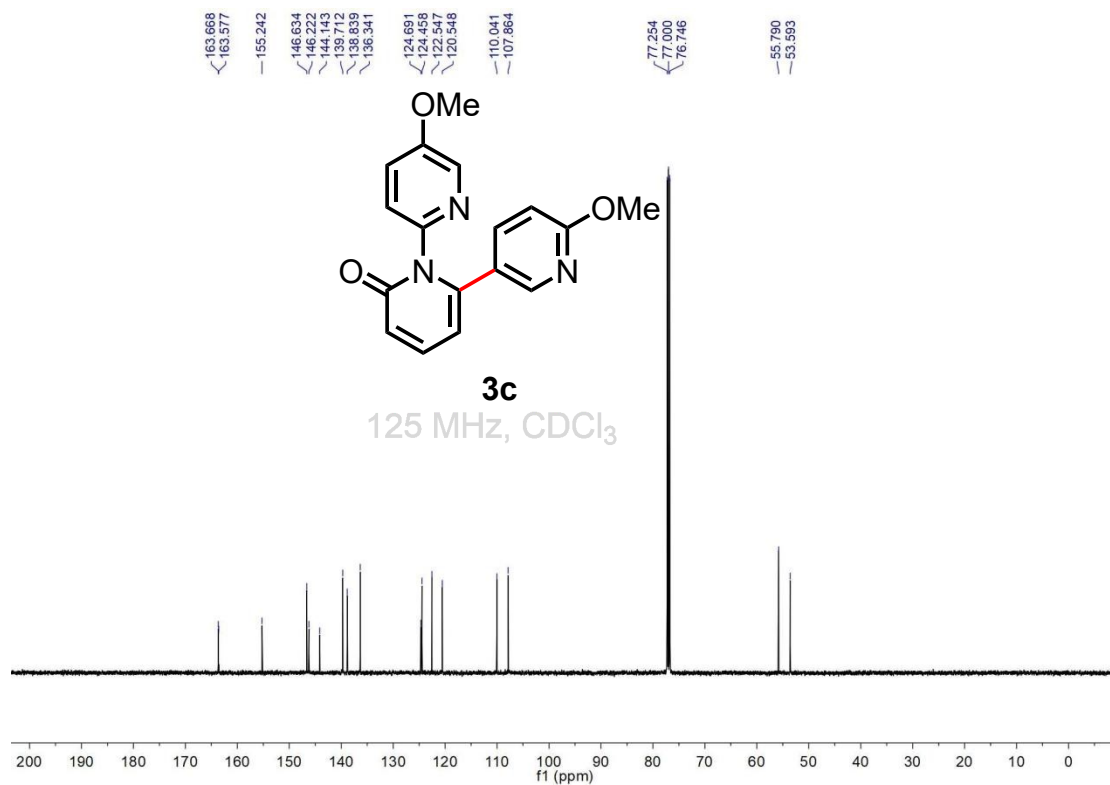

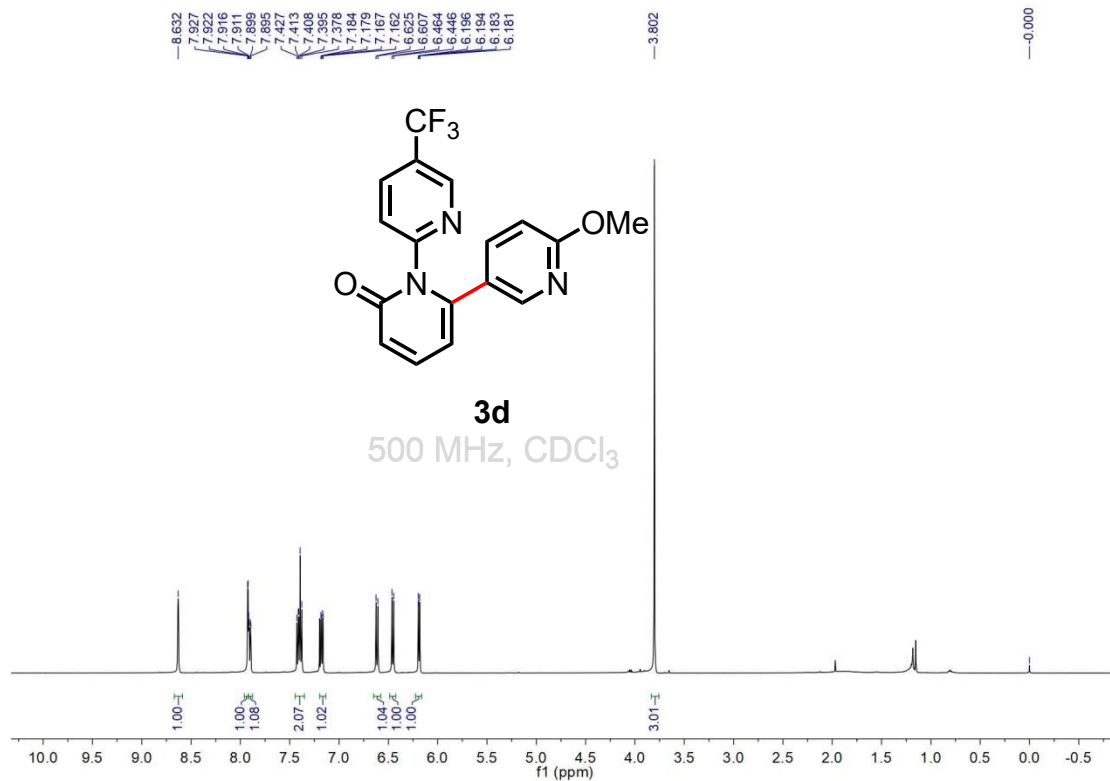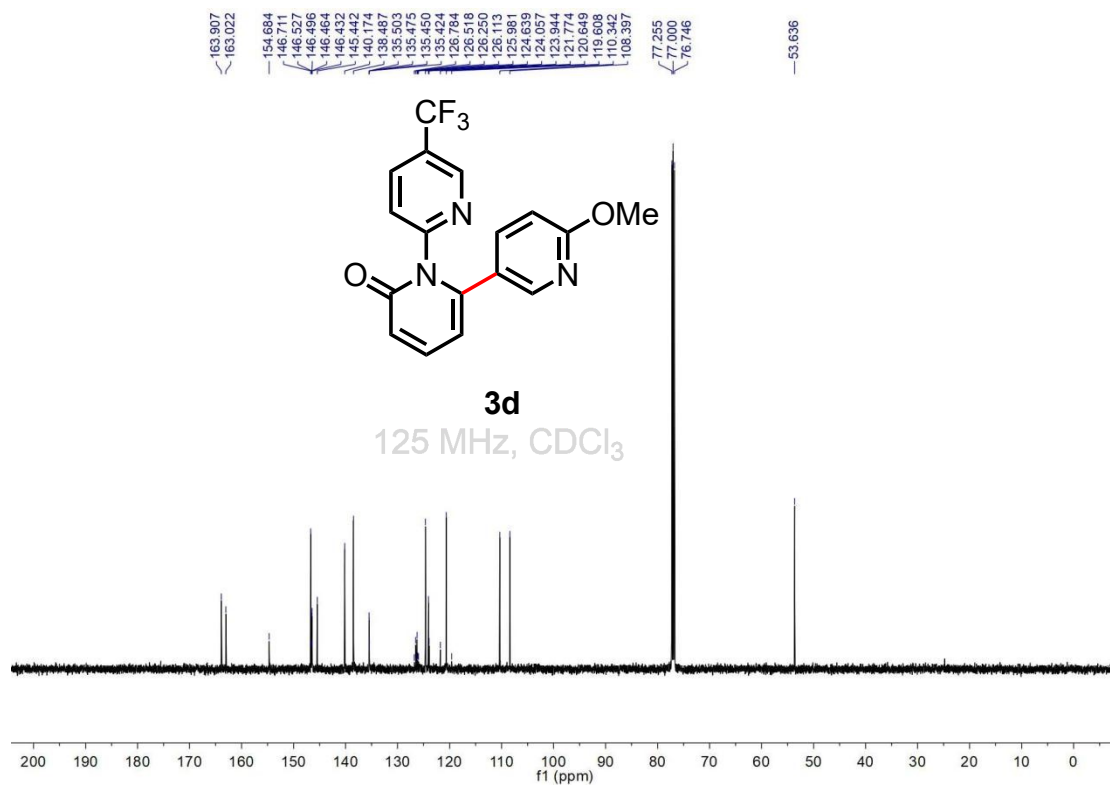

$^{19}\text{F}$  NMR spectrum

-62.316

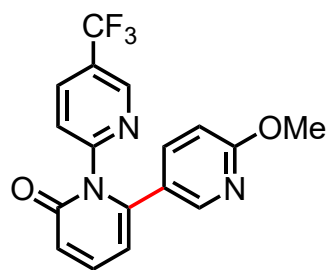

**3d**

470 Hz, CDCl<sub>3</sub>

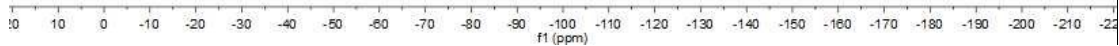

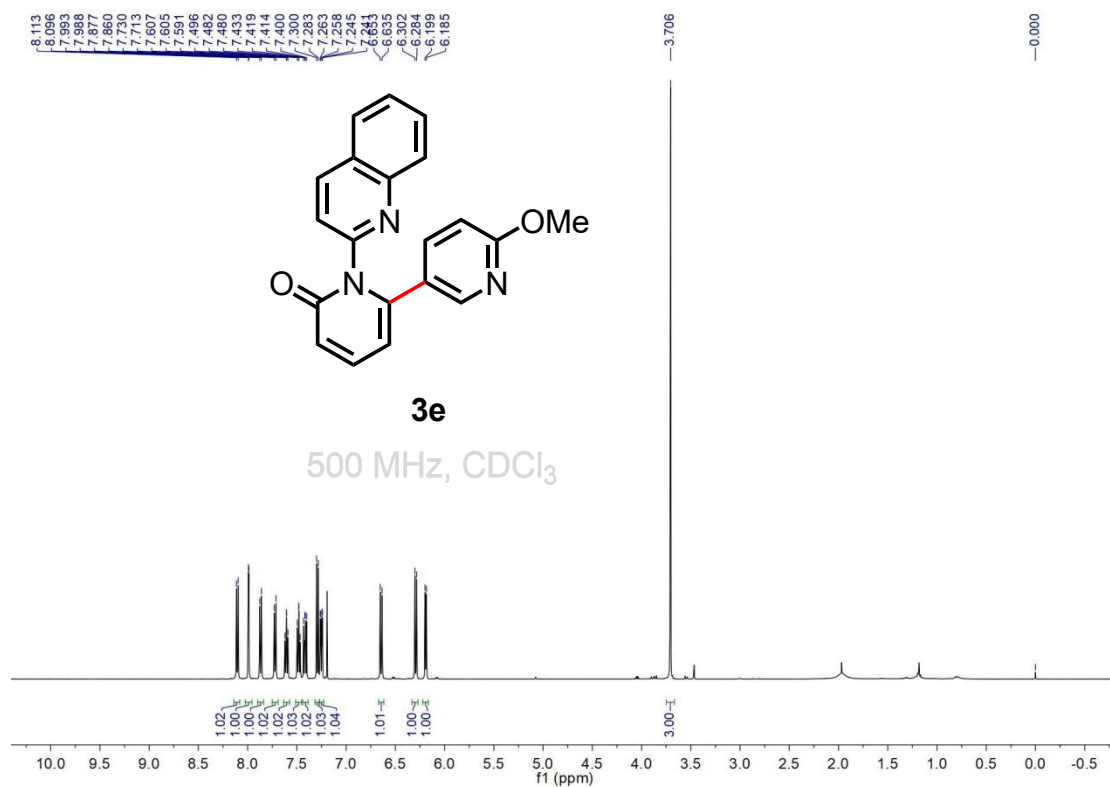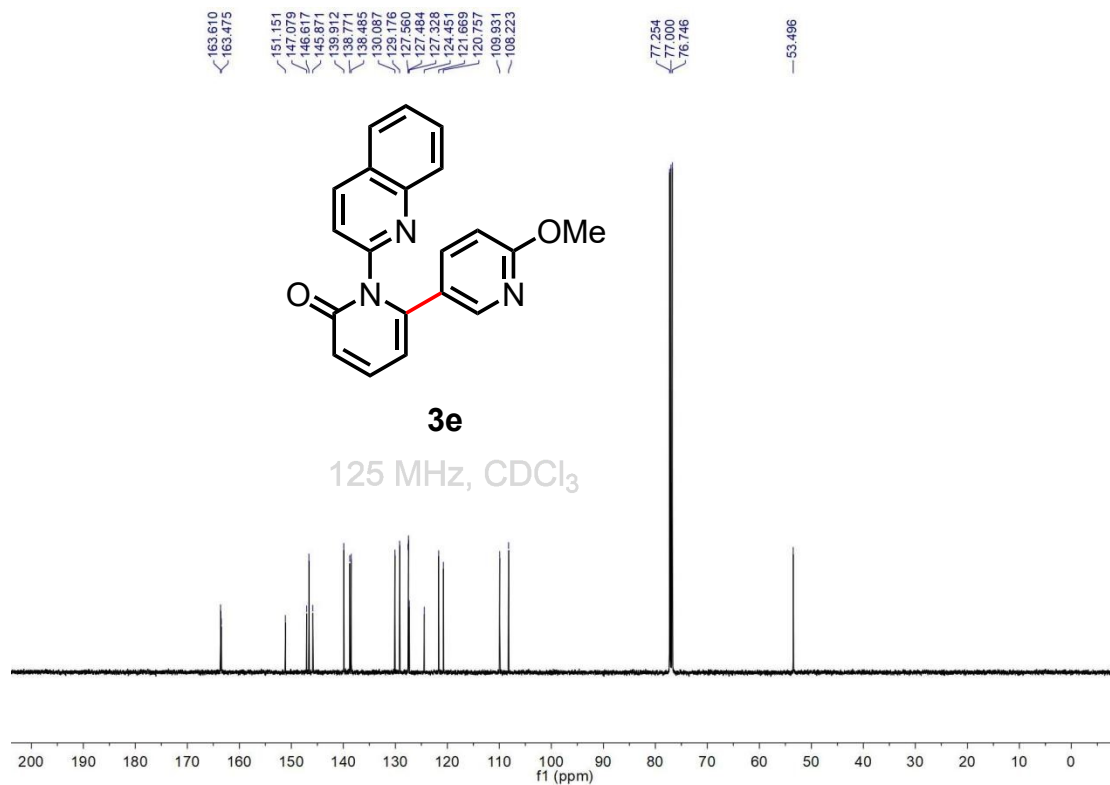



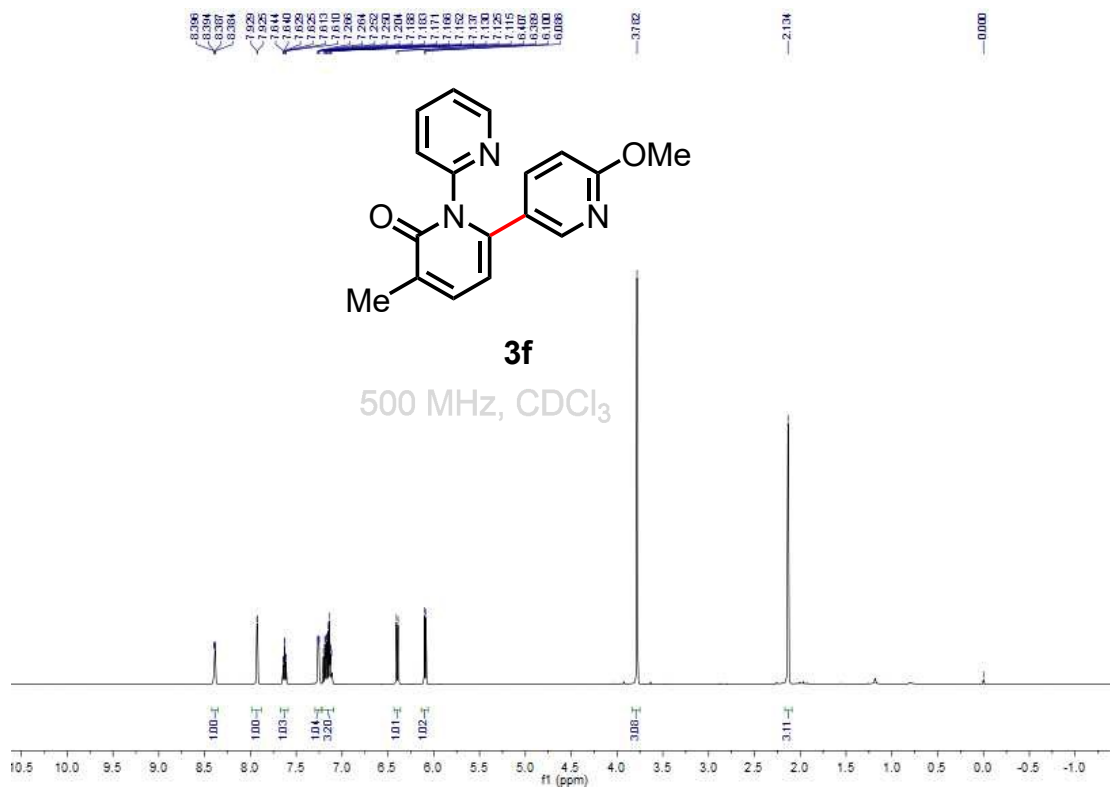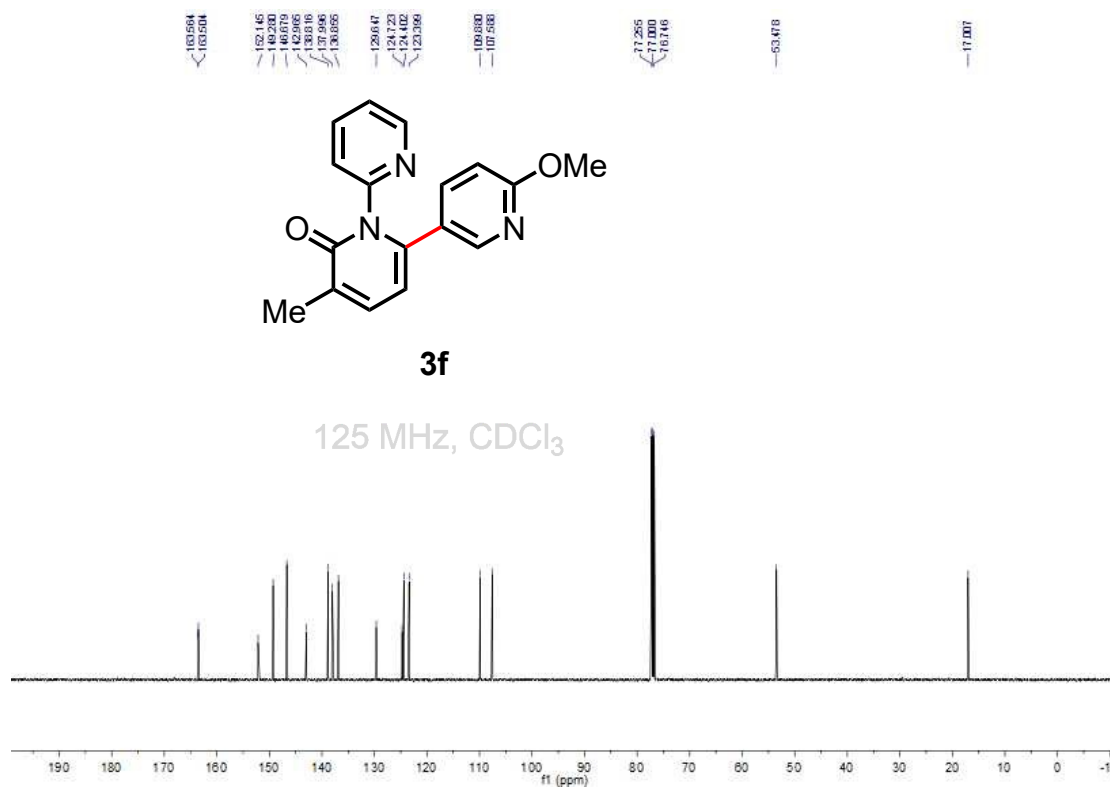

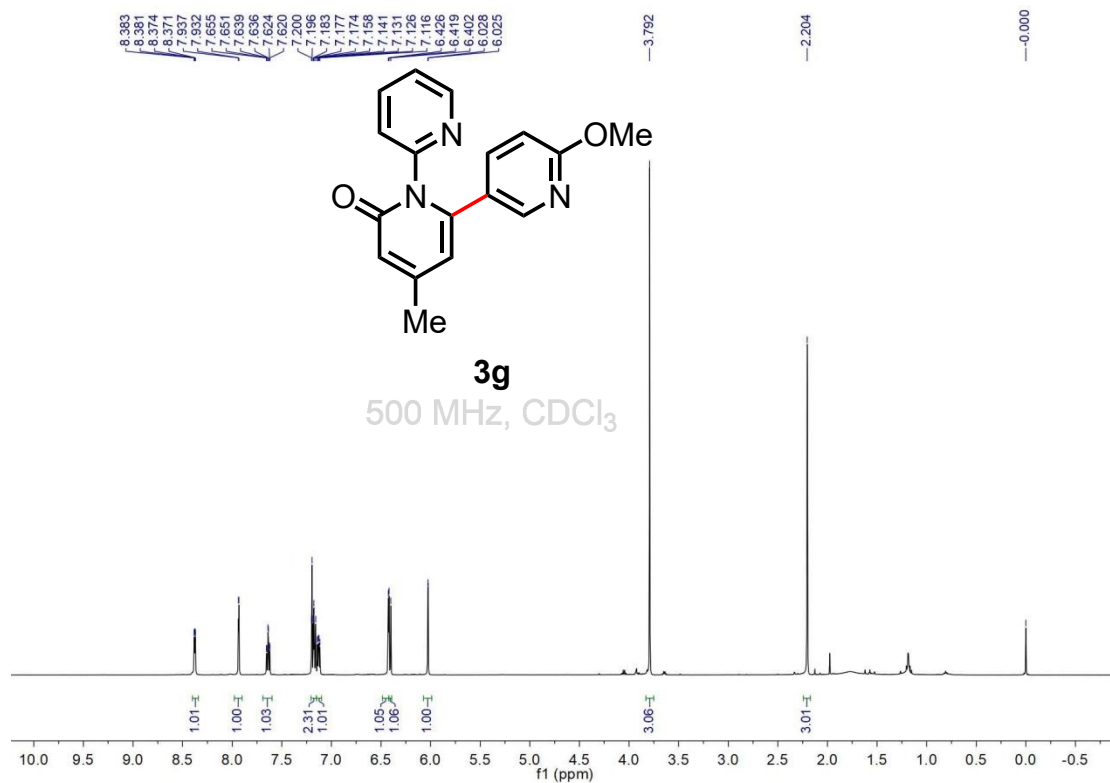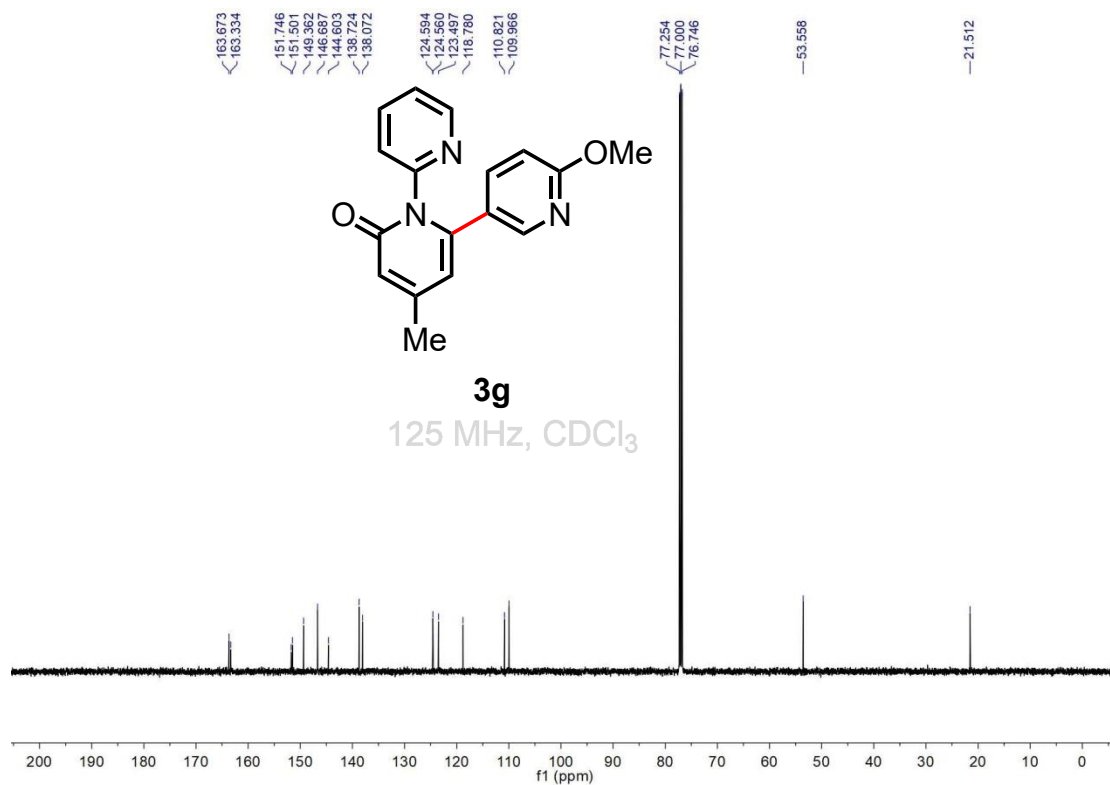

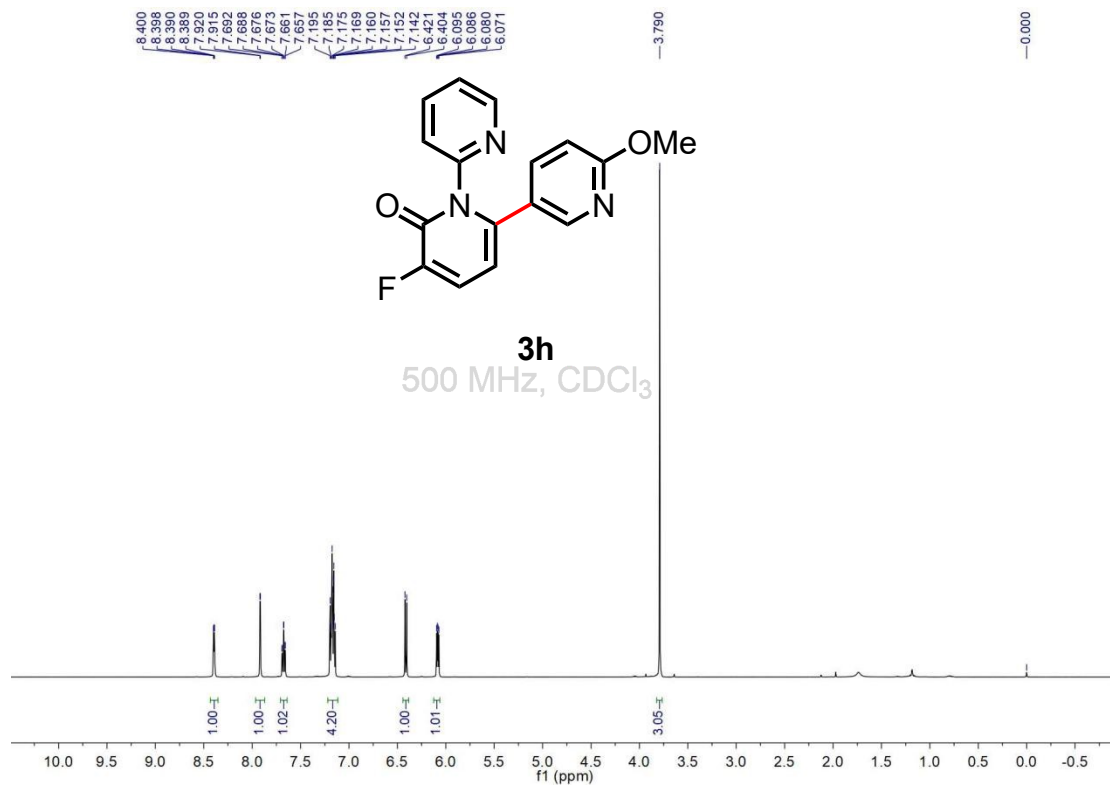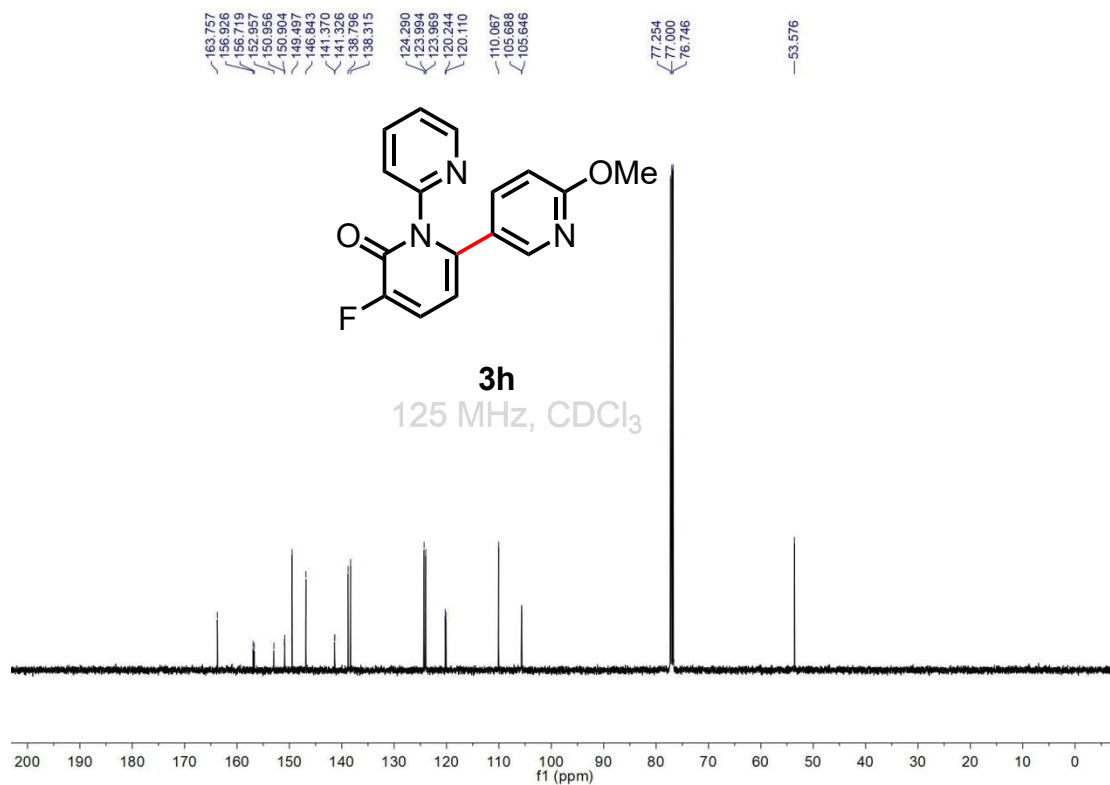

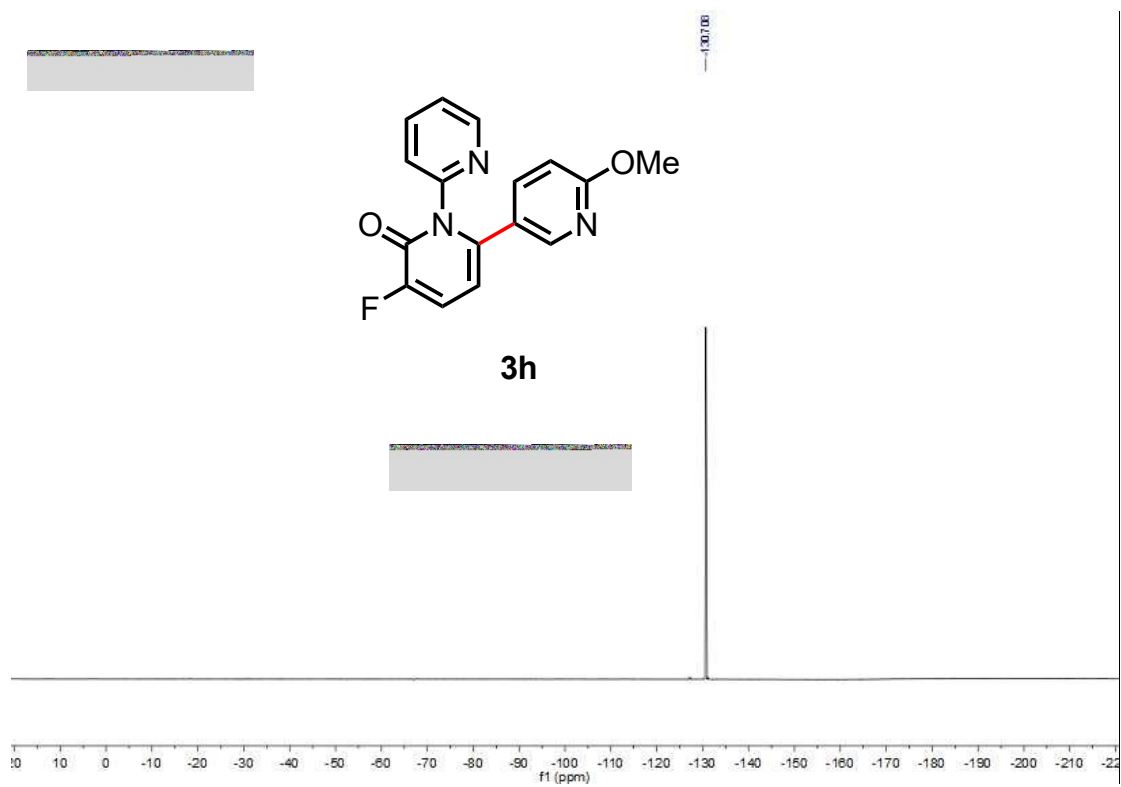

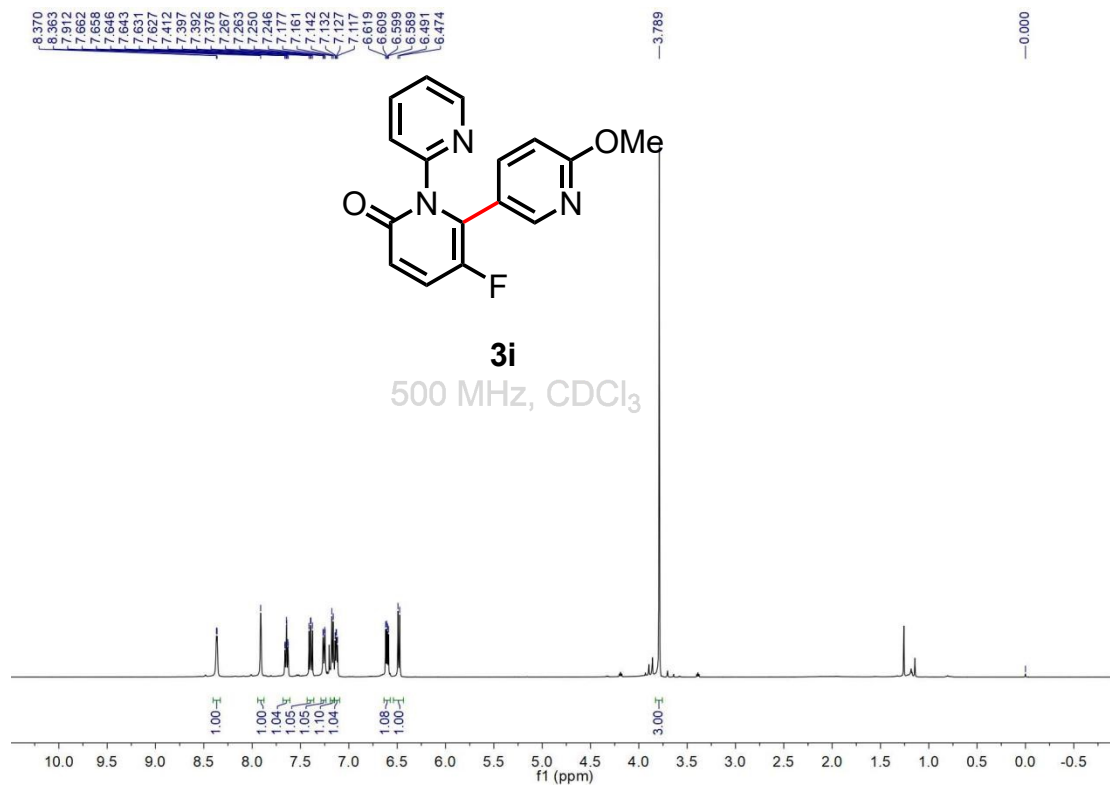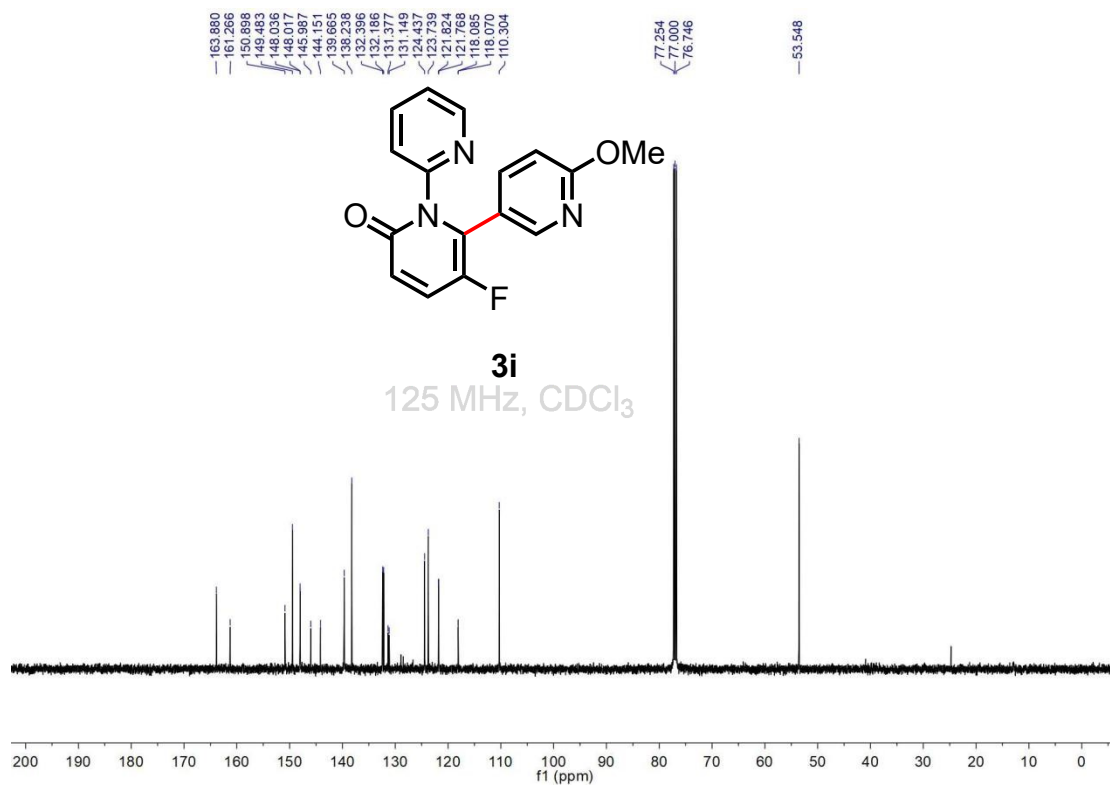

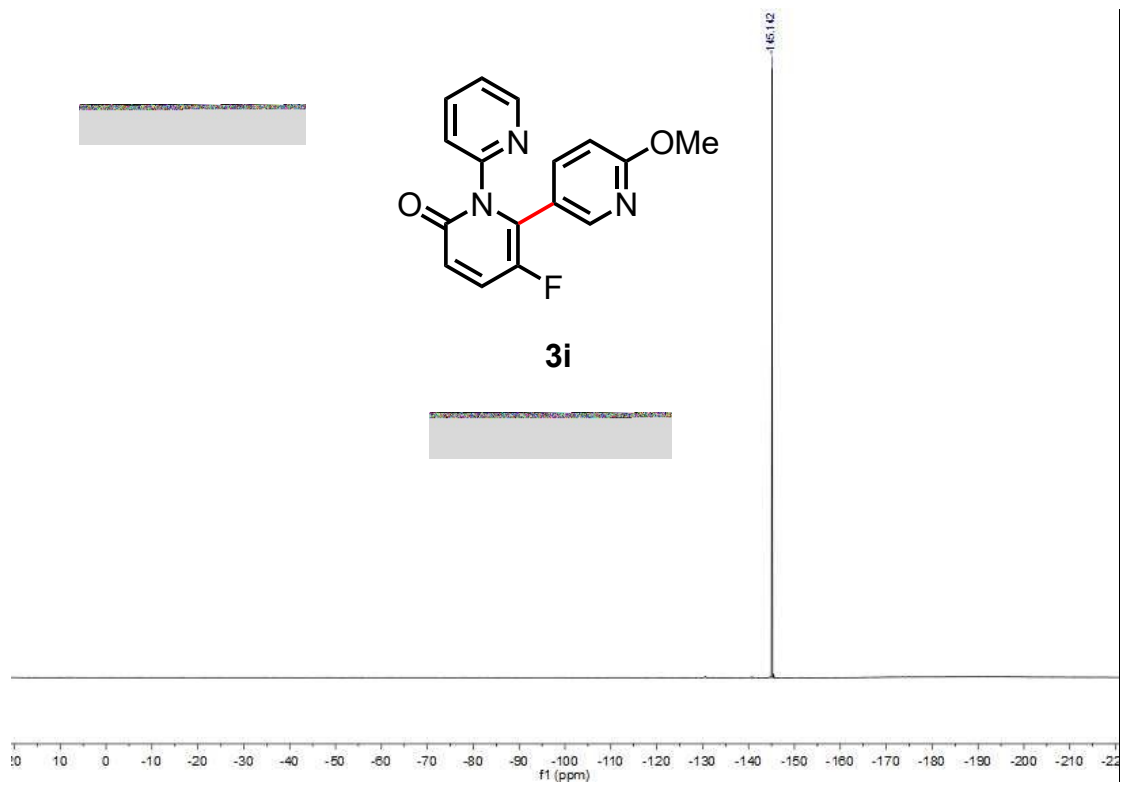

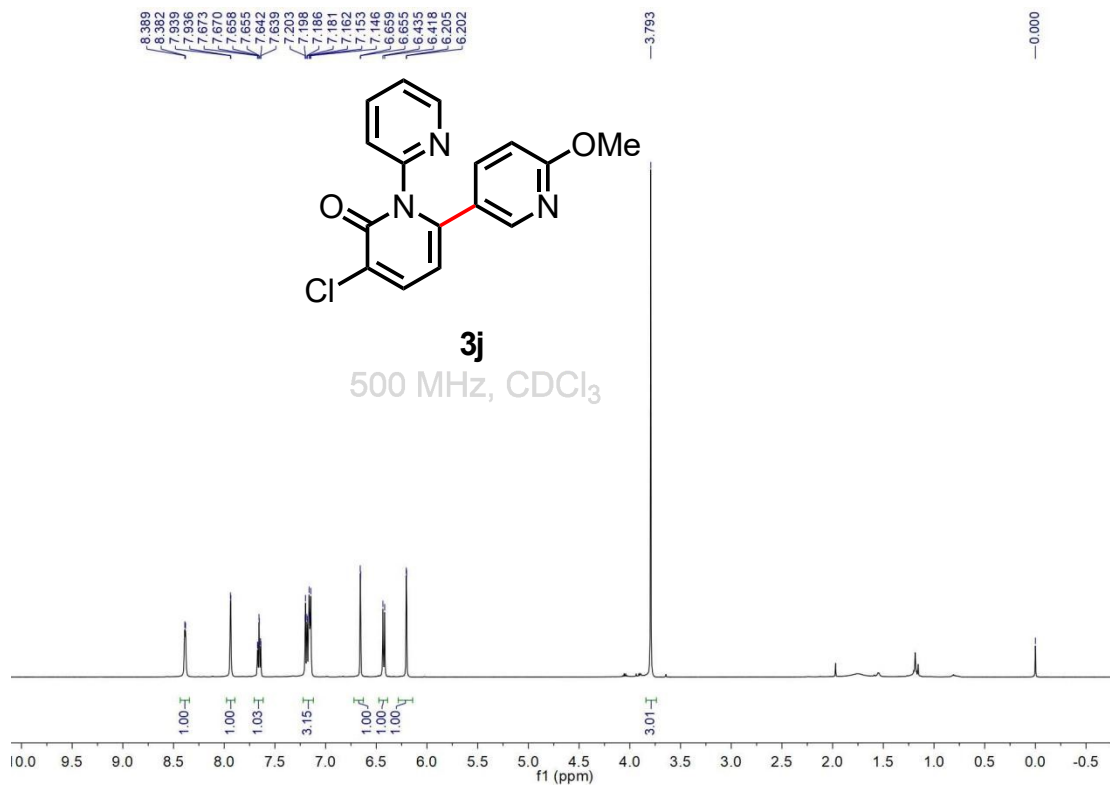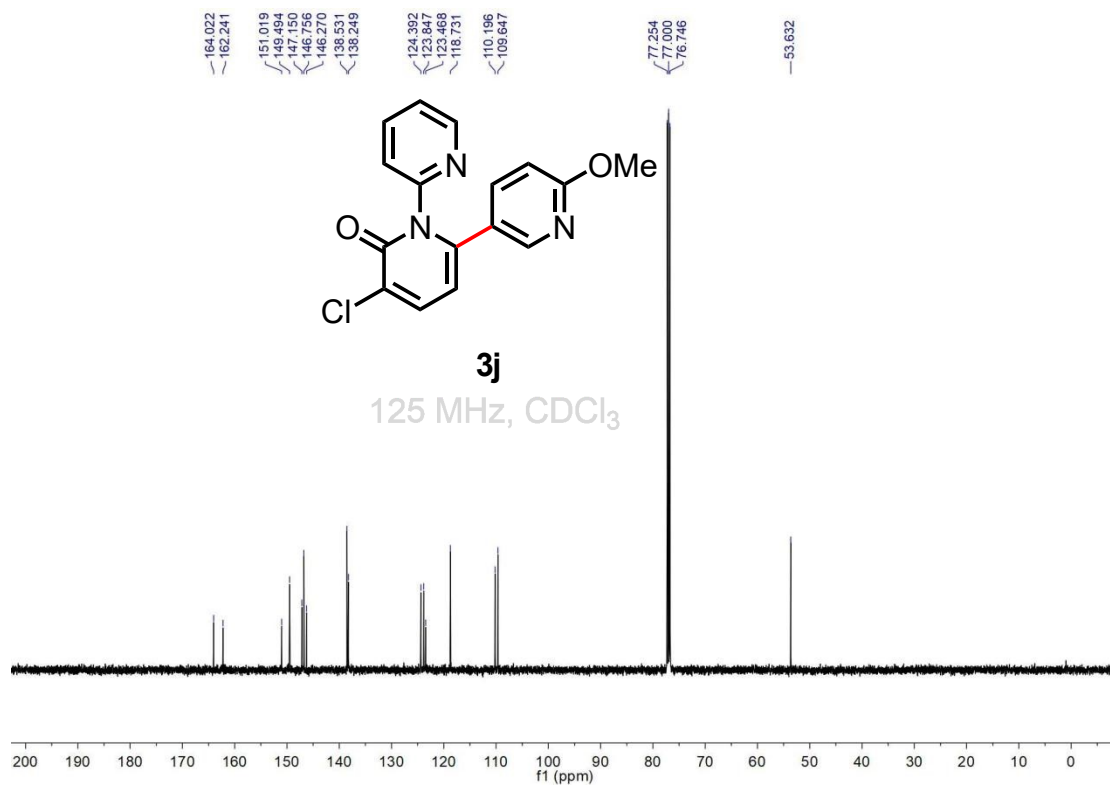

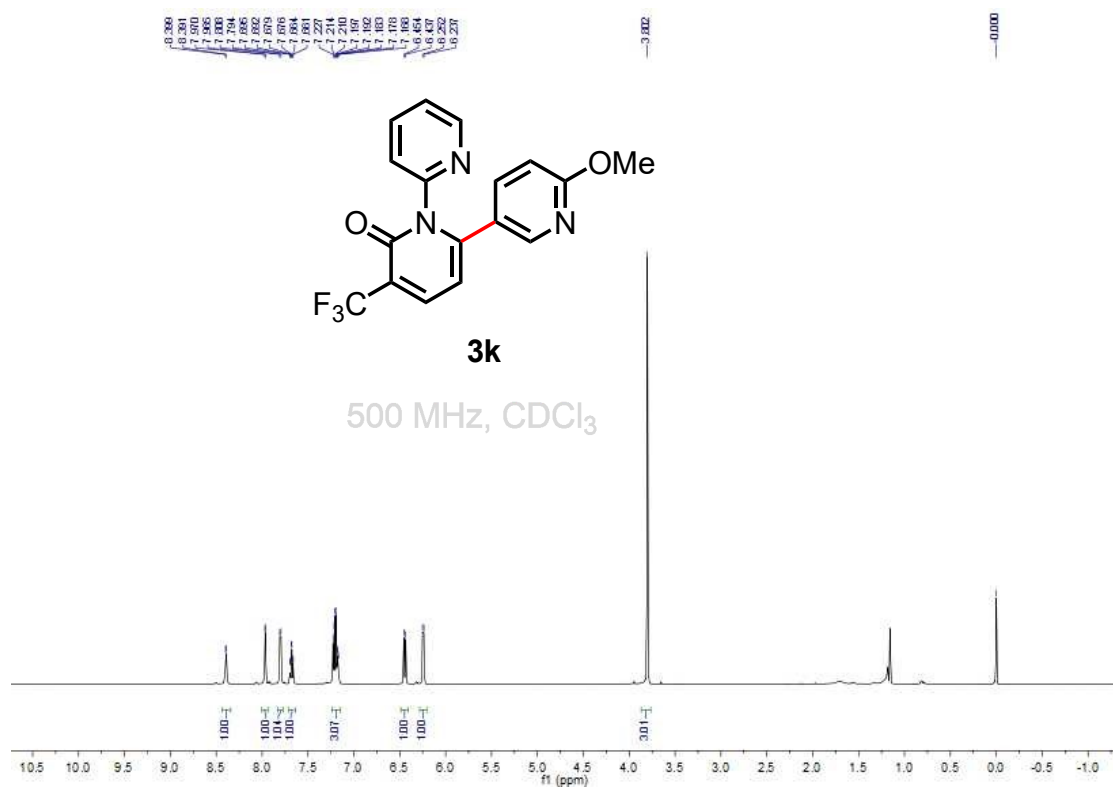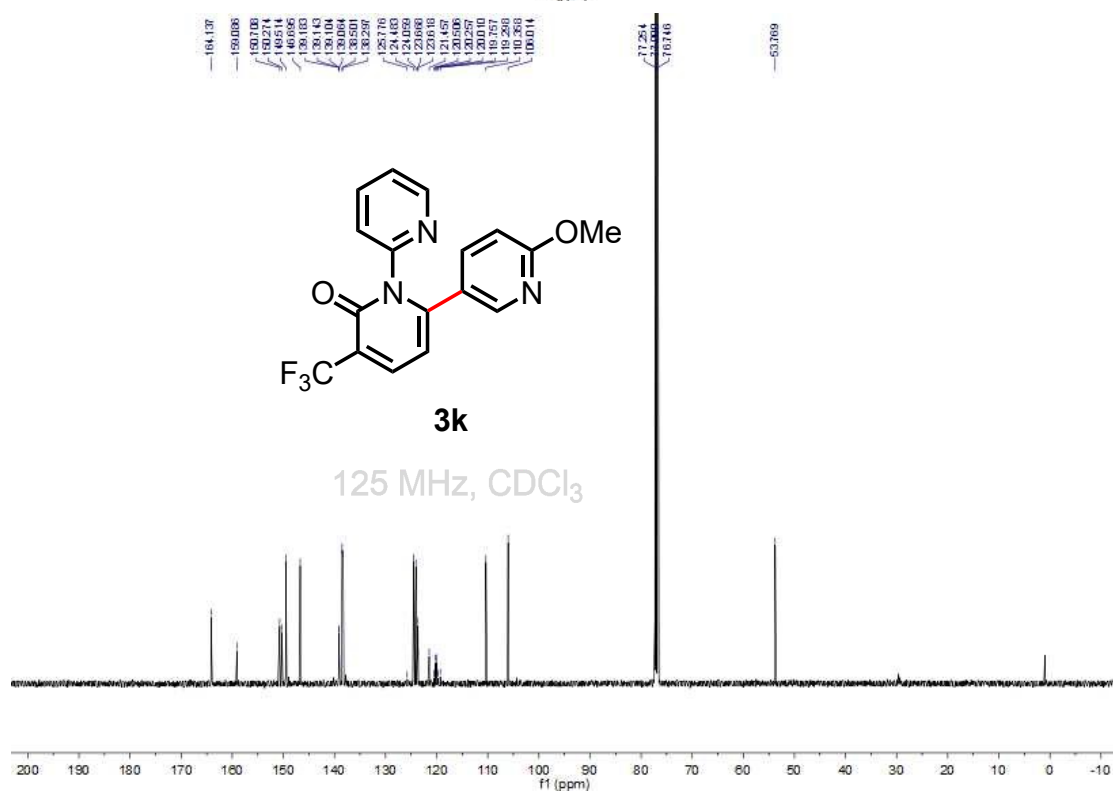



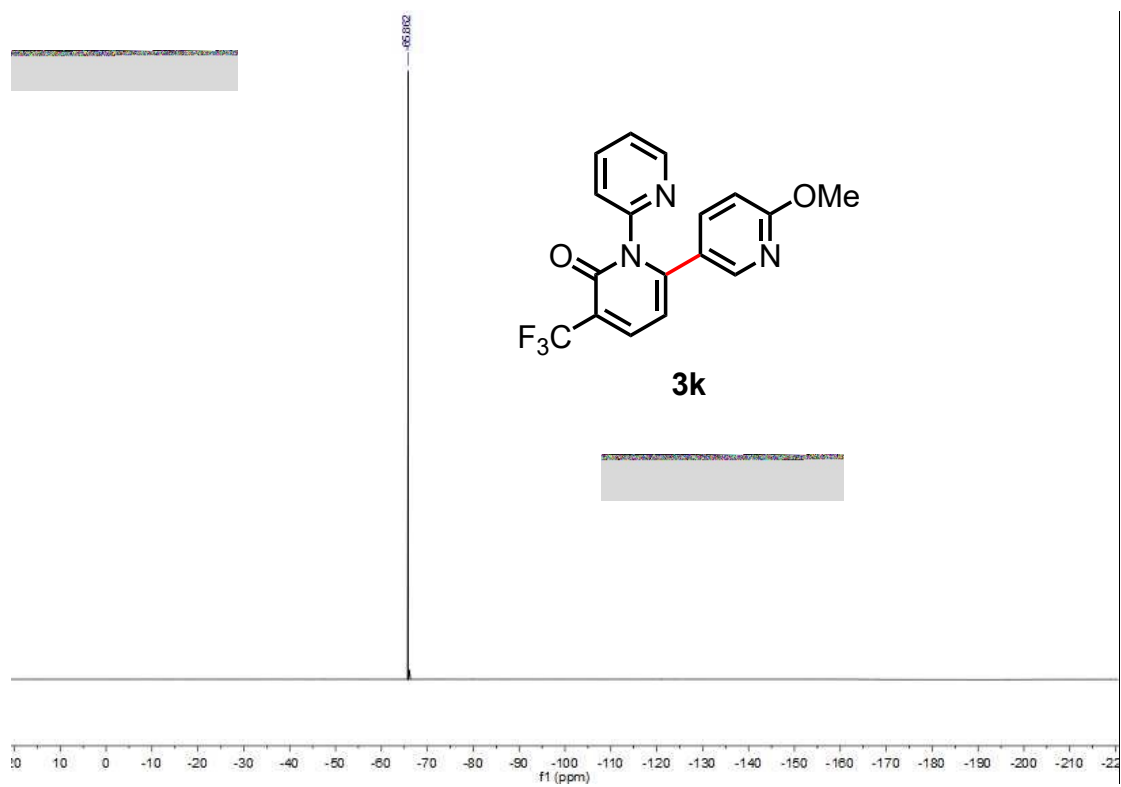

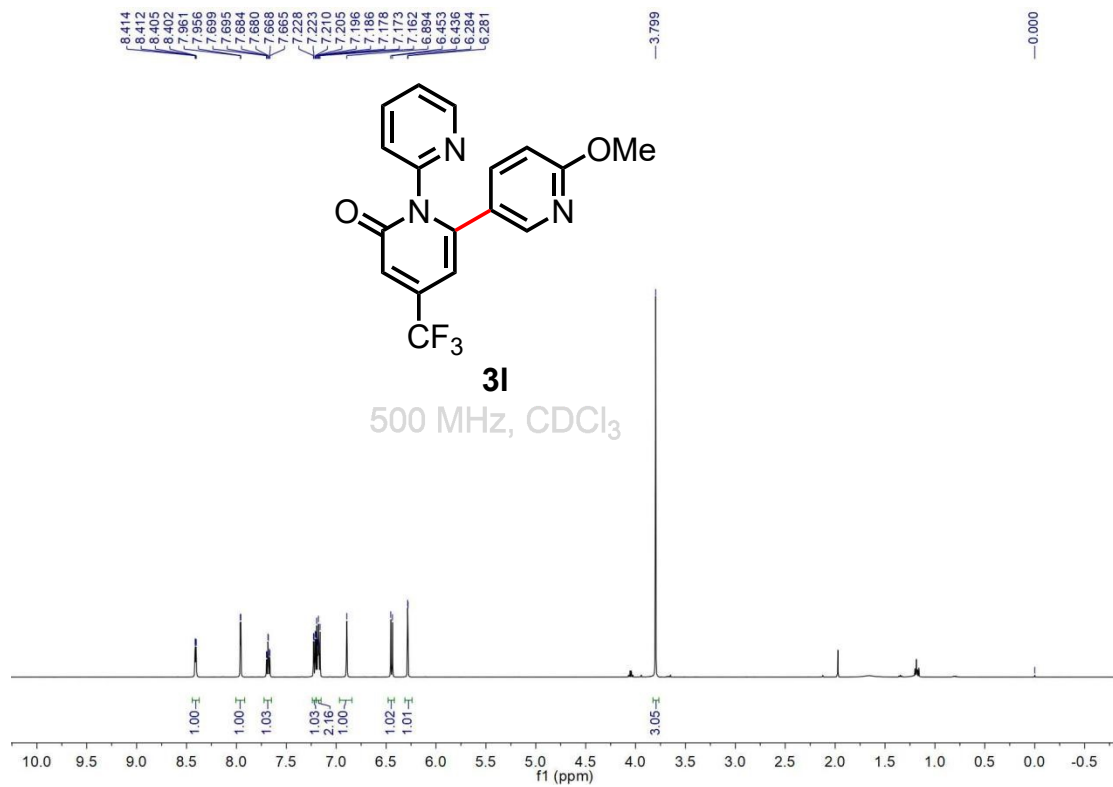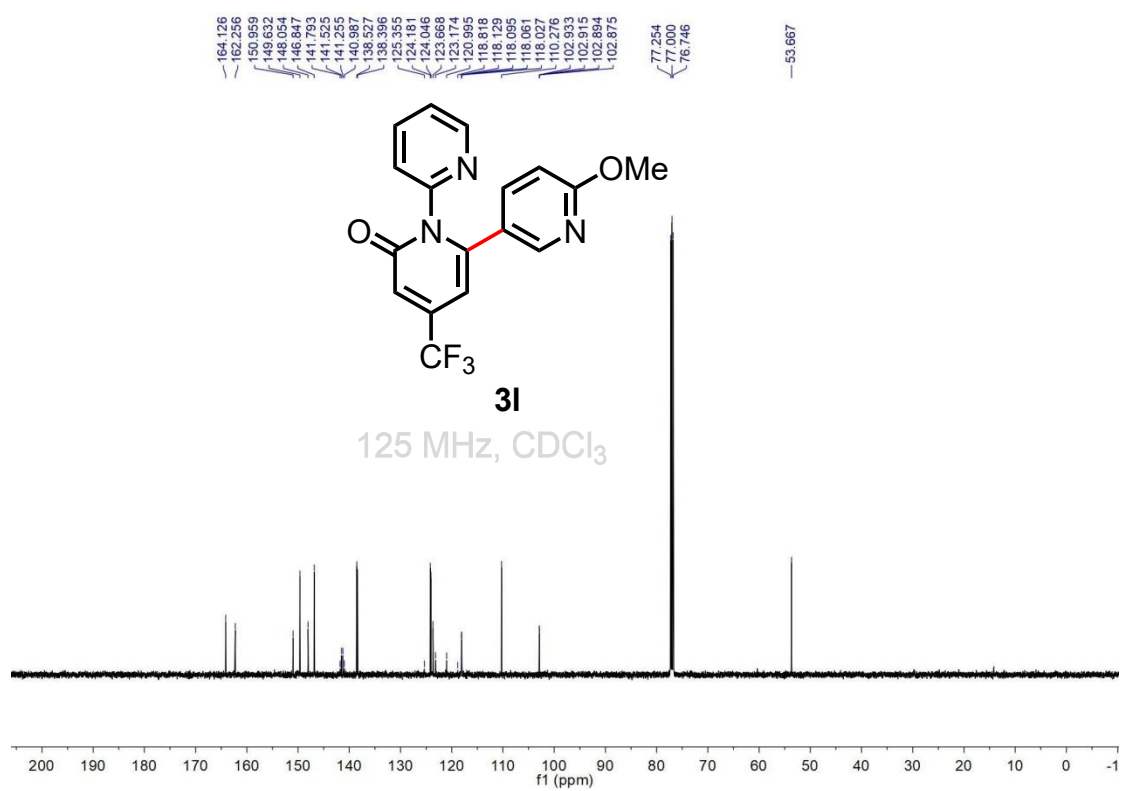

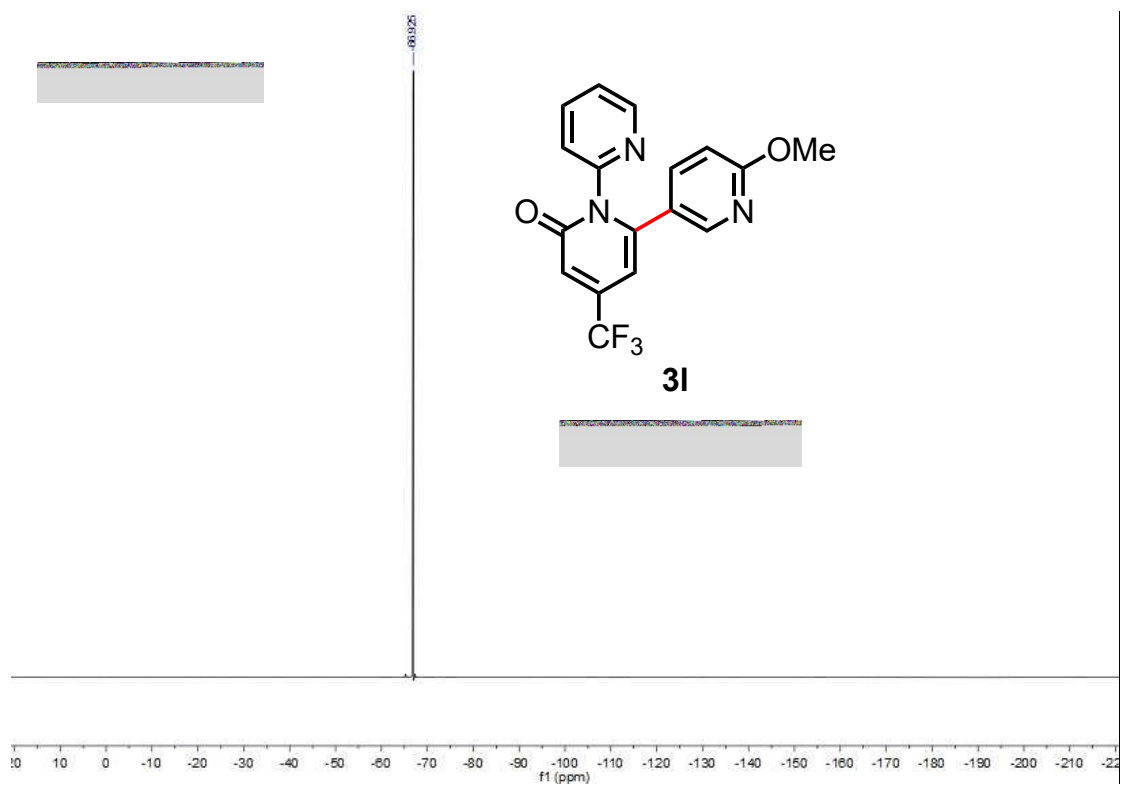

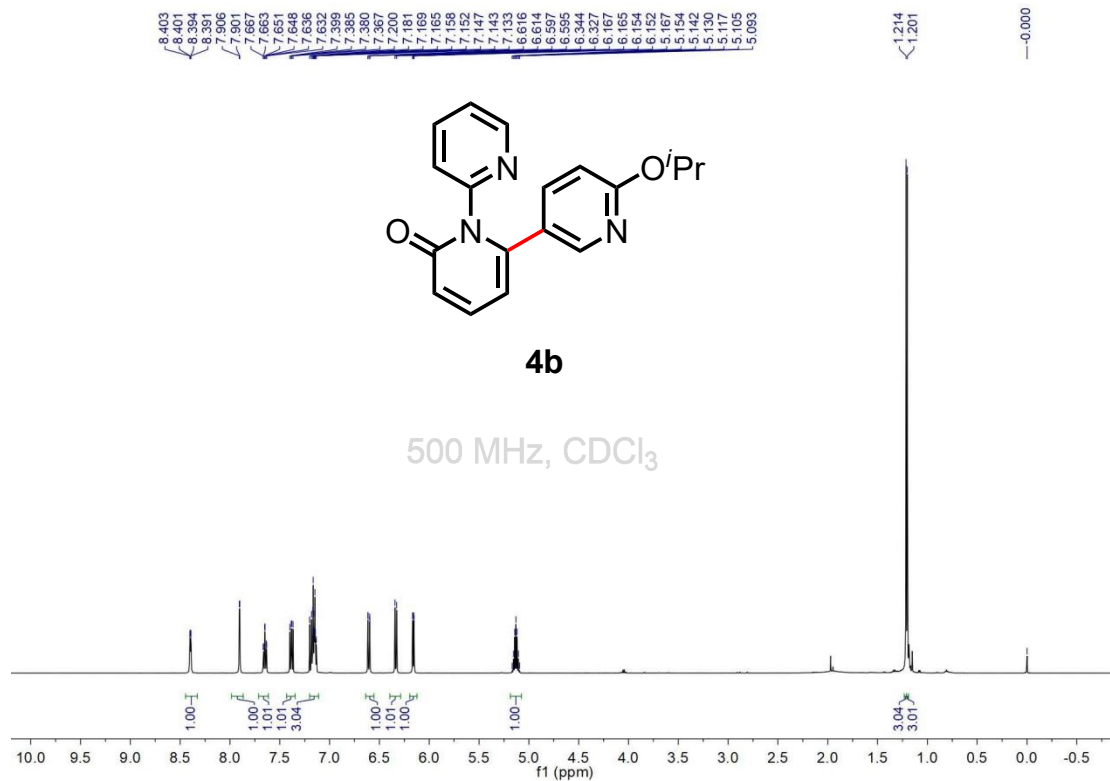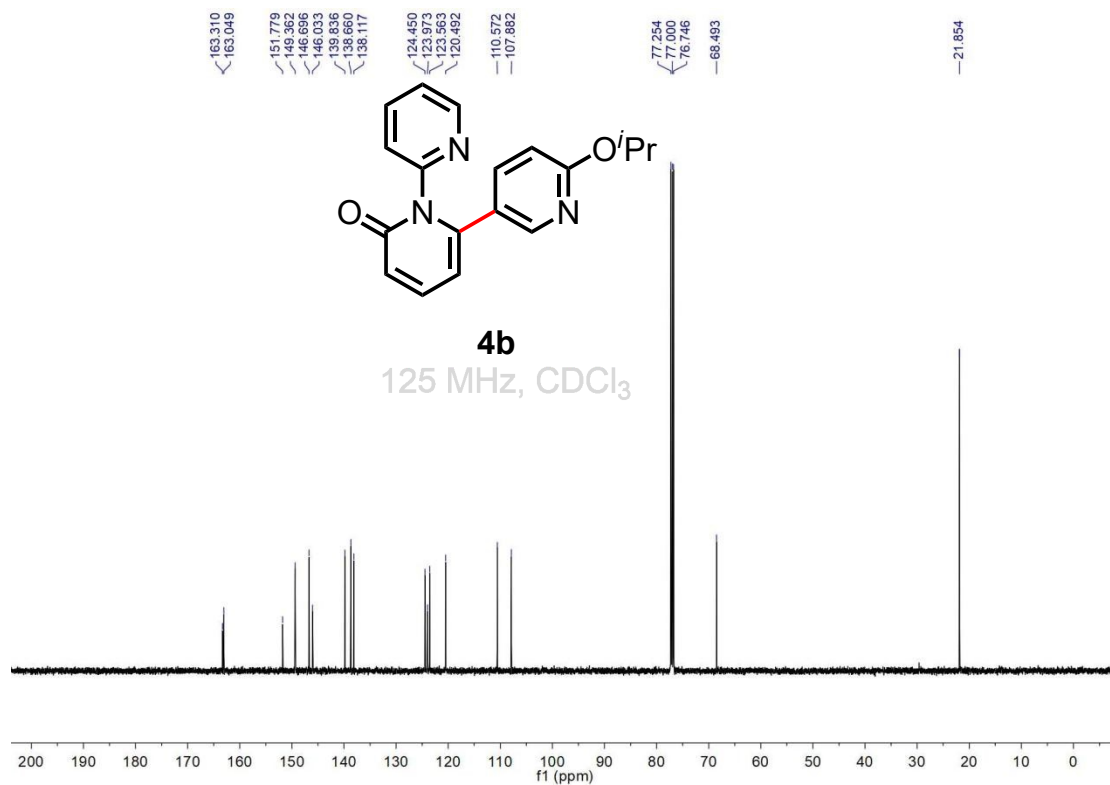

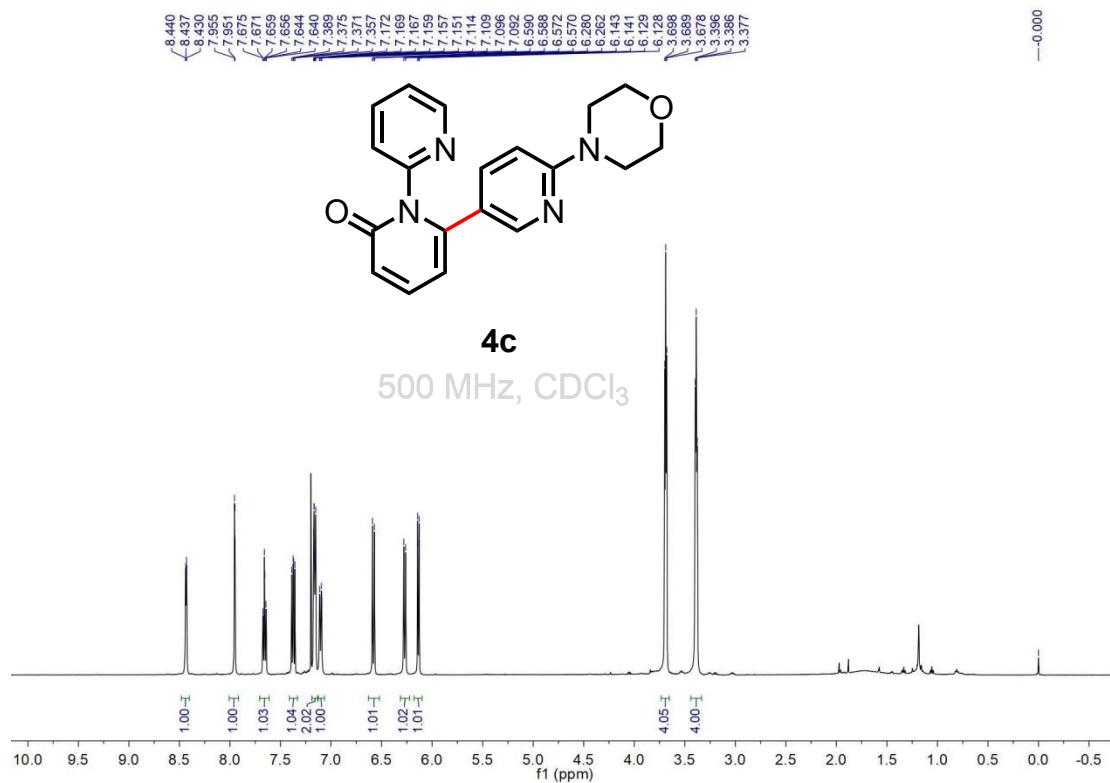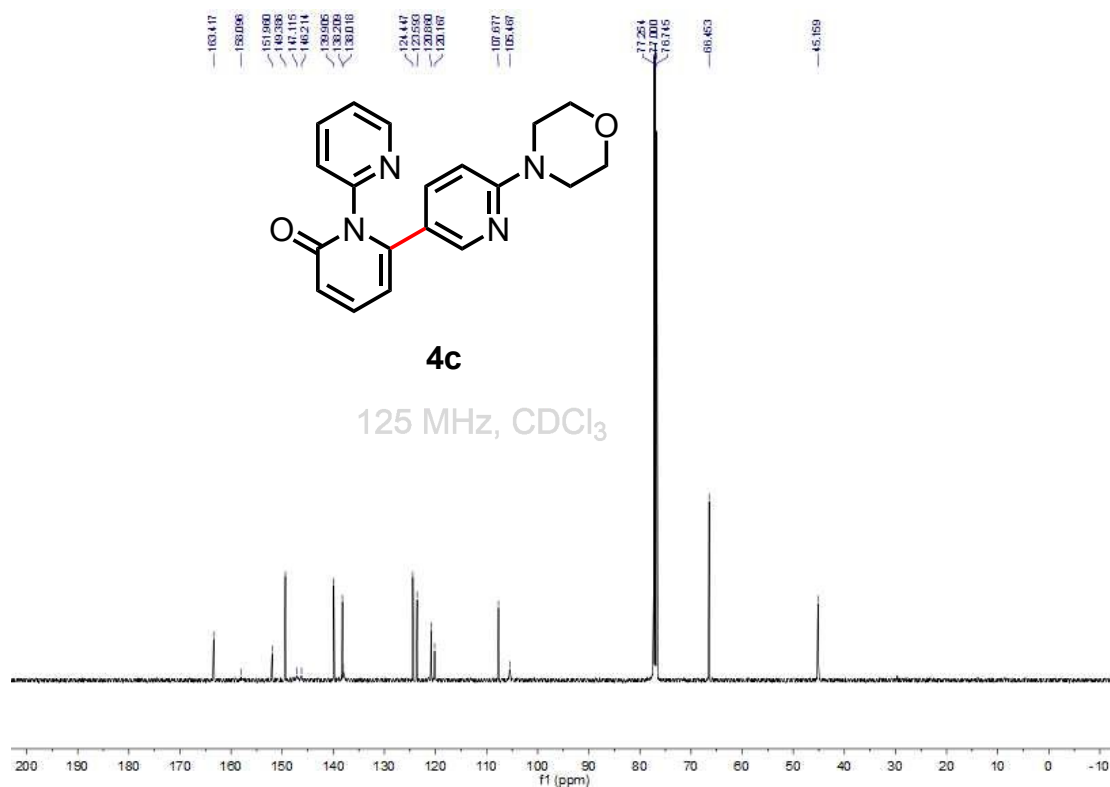

8.301  
8.260  
7.880  
7.860  
7.880  
7.877  
7.874  
7.859  
7.862  
7.867  
7.875  
7.860  
7.825  
7.825  
7.807  
7.803  
7.744  
7.739  
7.730  
7.718  
7.754  
7.754  
4.688  
4.682  
4.681  
4.682  
4.679

0.000

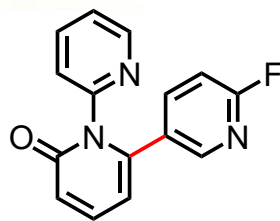

4d

500 MHz, CDCl<sub>3</sub>

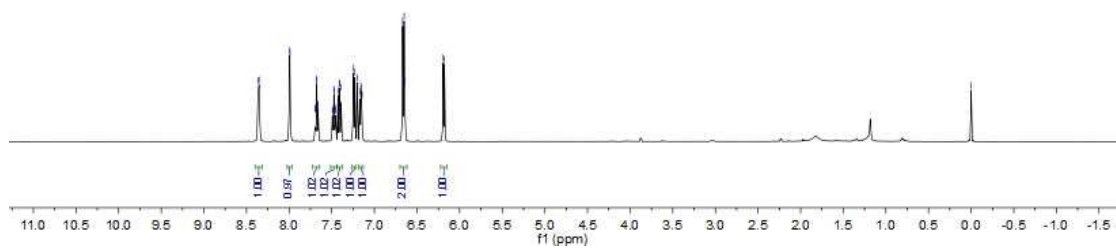

163.881  
162.512  
161.500  
151.287  
149.122  
147.284  
144.520  
141.827  
139.282  
138.283  
130.211  
129.700  
124.472  
123.809  
121.536  
108.682  
108.683  
108.596  
77.264  
77.000  
76.746

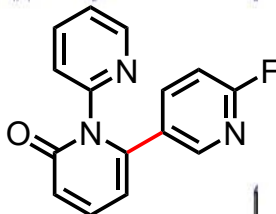

4d

125 MHz, CDCl<sub>3</sub>

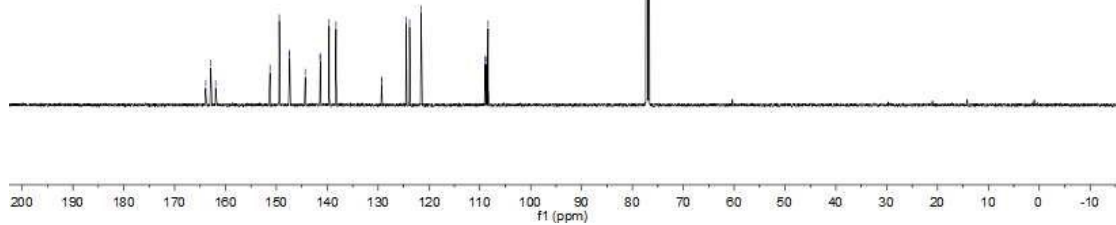

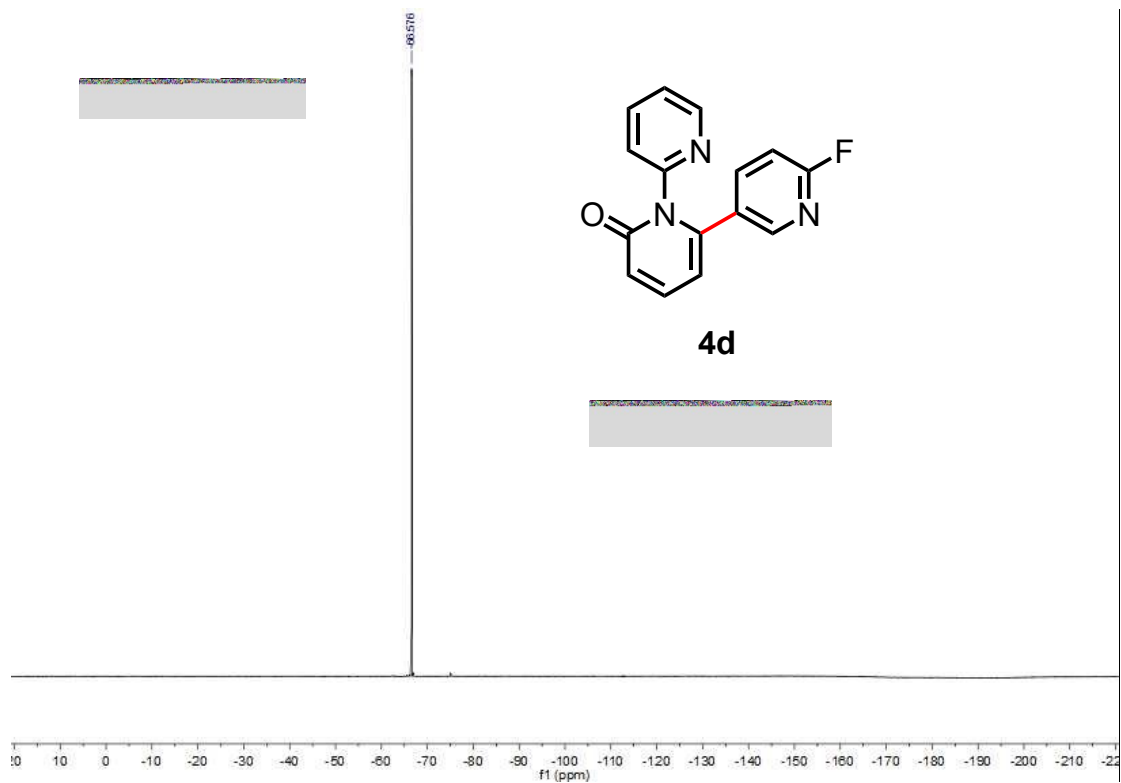

8.352  
8.140  
8.136  
8.136  
7.698  
7.683  
7.679  
7.667  
7.664  
7.419  
7.406  
7.387  
7.341  
7.336  
7.325  
7.319  
7.263  
7.247  
7.175  
7.163  
7.164  
7.160  
7.158  
7.150  
7.149  
7.059  
7.042  
6.684  
6.682  
6.643  
6.643  
6.187  
6.184  
6.173  
6.171

—0.000

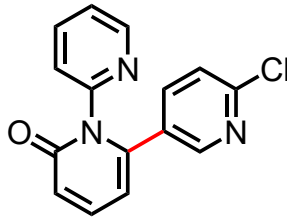

**4e**

500 MHz, CDCl<sub>3</sub>

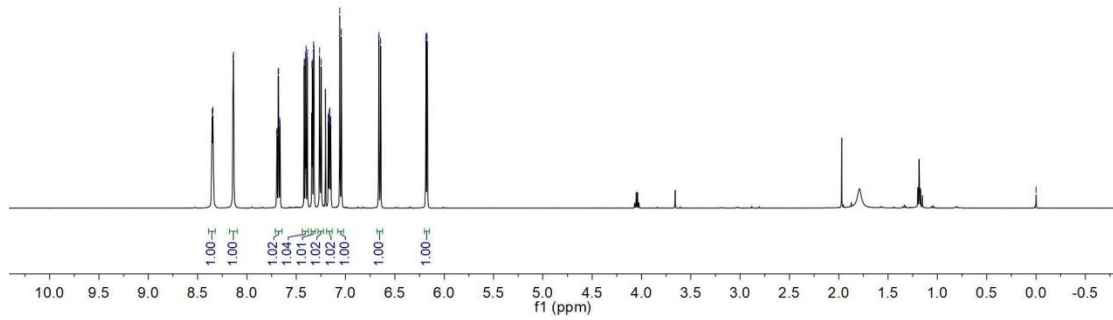

162.846  
151.405  
151.130  
149.424  
148.578  
146.565  
146.565  
138.832  
138.266  
130.216  
124.455  
123.876  
123.385  
121.640  
108.462  
77.254  
77.000  
76.746

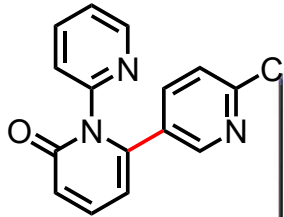

**4e**

125 MHz, CDCl<sub>3</sub>

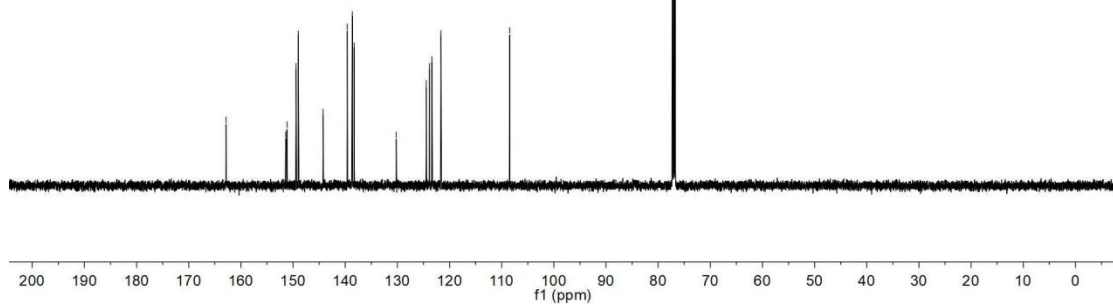



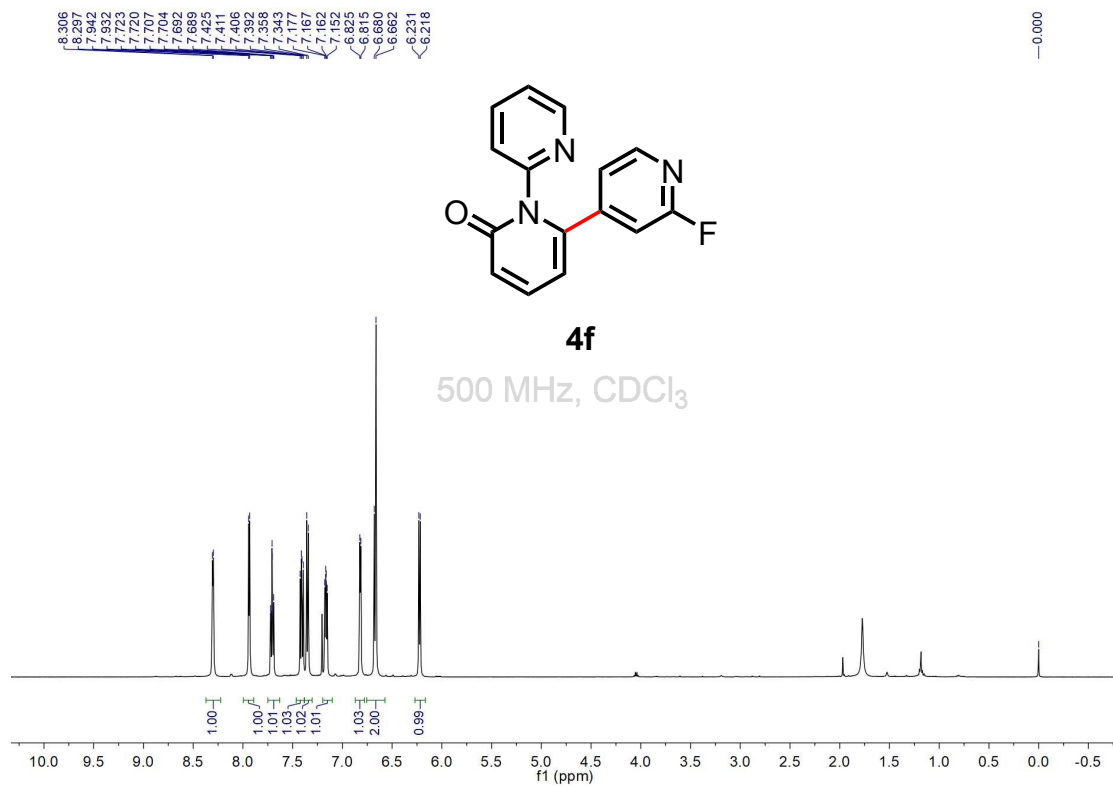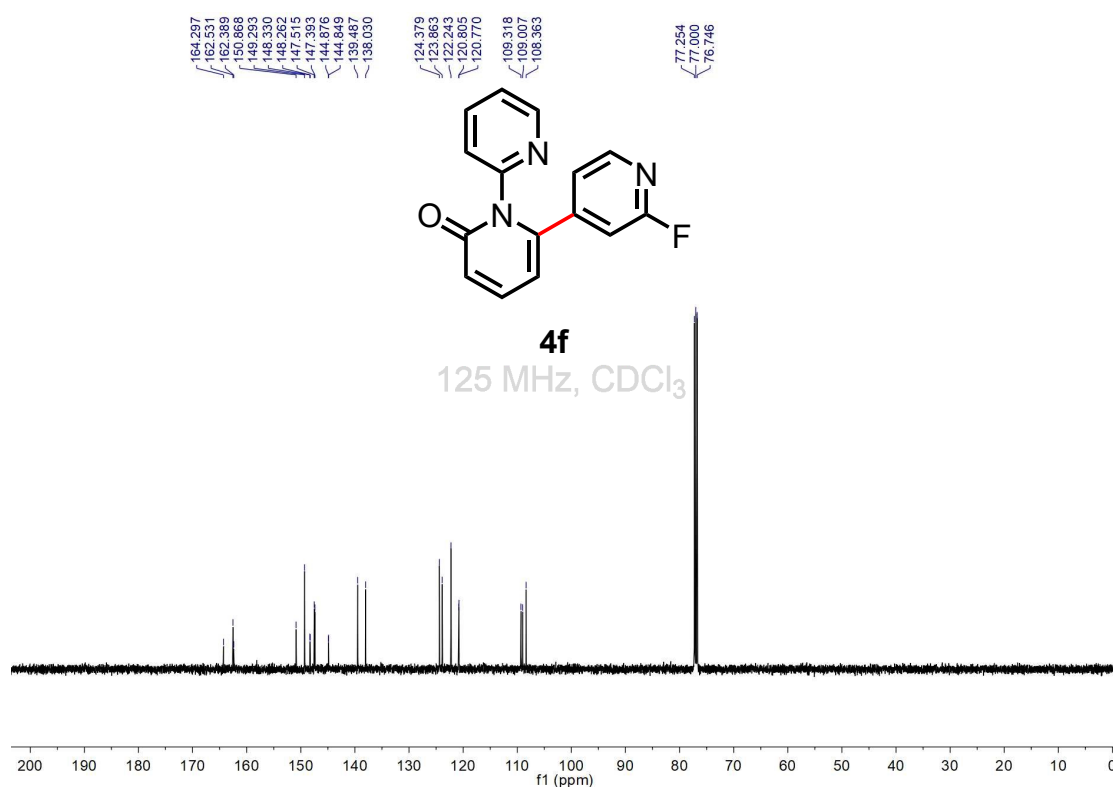

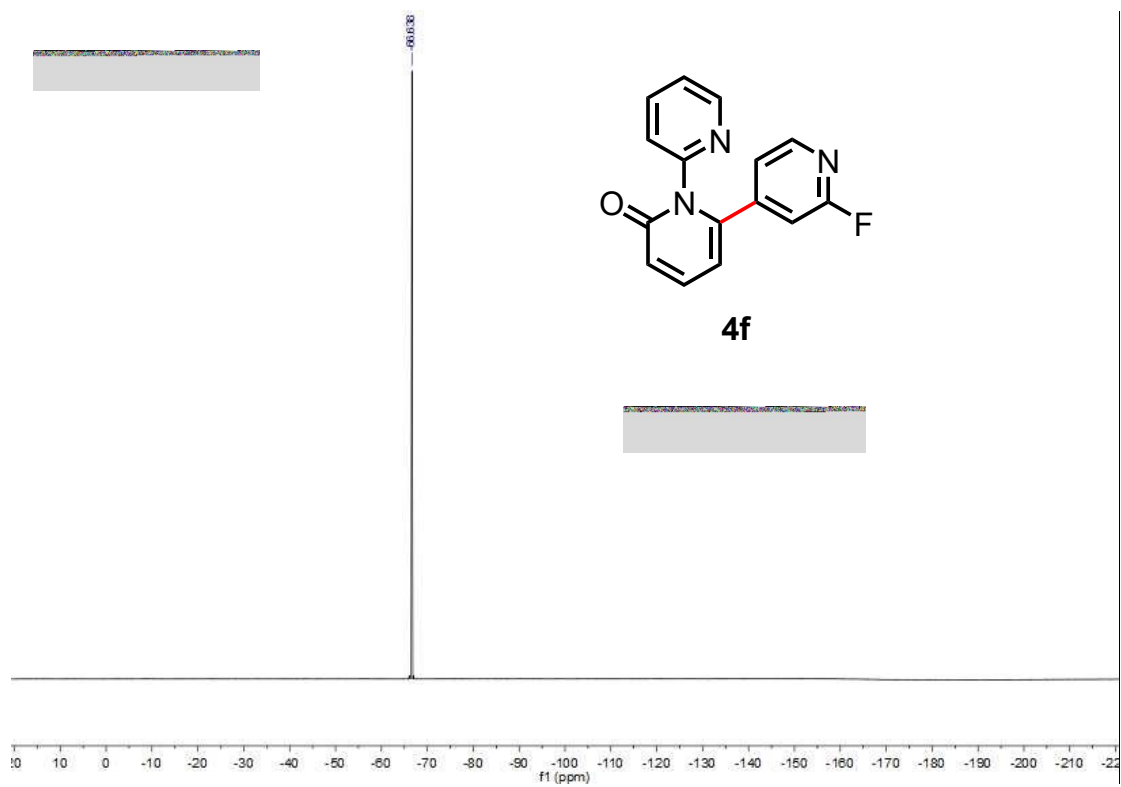

8.320  
8.311  
8.108  
8.098  
7.736  
7.733  
7.720  
7.717  
7.705  
7.702  
7.424  
7.410  
7.405  
7.392  
7.363  
7.347  
7.198  
7.188  
7.178  
7.175  
7.163  
7.072  
6.852  
6.849  
6.841  
6.839  
6.684  
6.686  
6.223  
6.210

-0.000

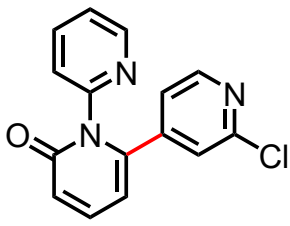

**4g**

500 MHz, CDCl<sub>3</sub>

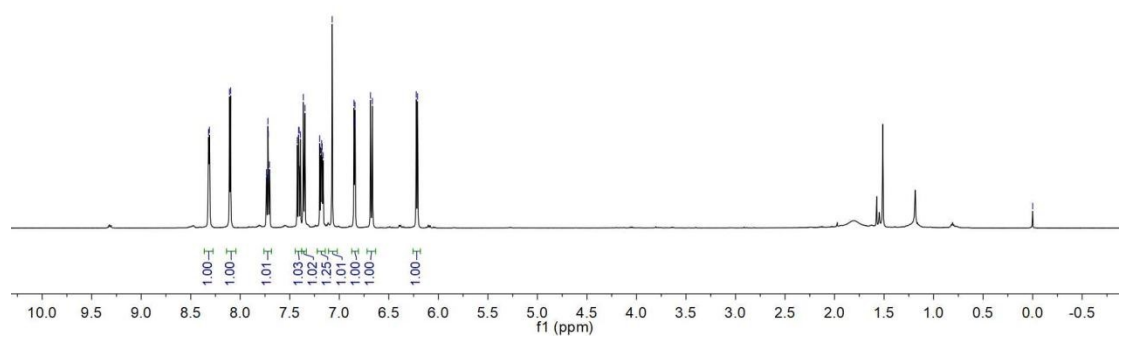

162.548  
151.609  
150.845  
149.349  
149.314  
145.913  
144.714  
139.510  
138.085  
124.433  
123.919  
123.545  
122.307  
121.605  
108.481  
77.254  
77.000  
76.746

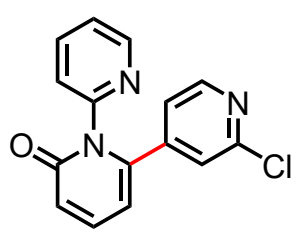

**4g**

125 MHz, CDCl<sub>3</sub>

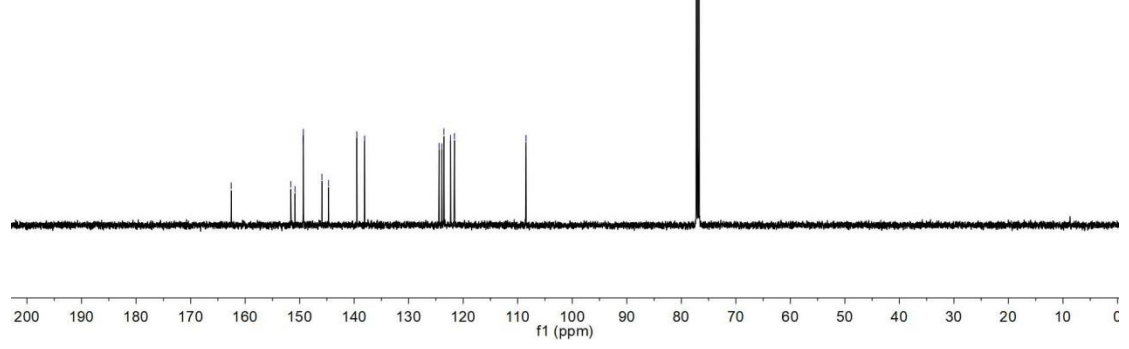

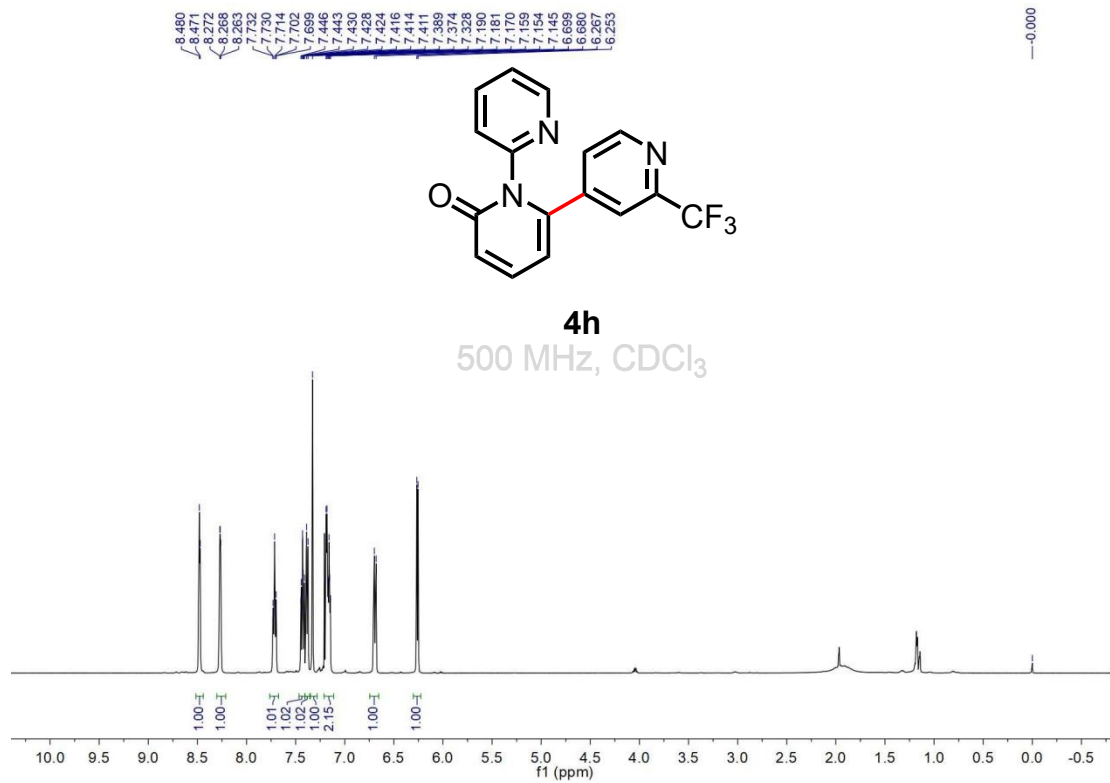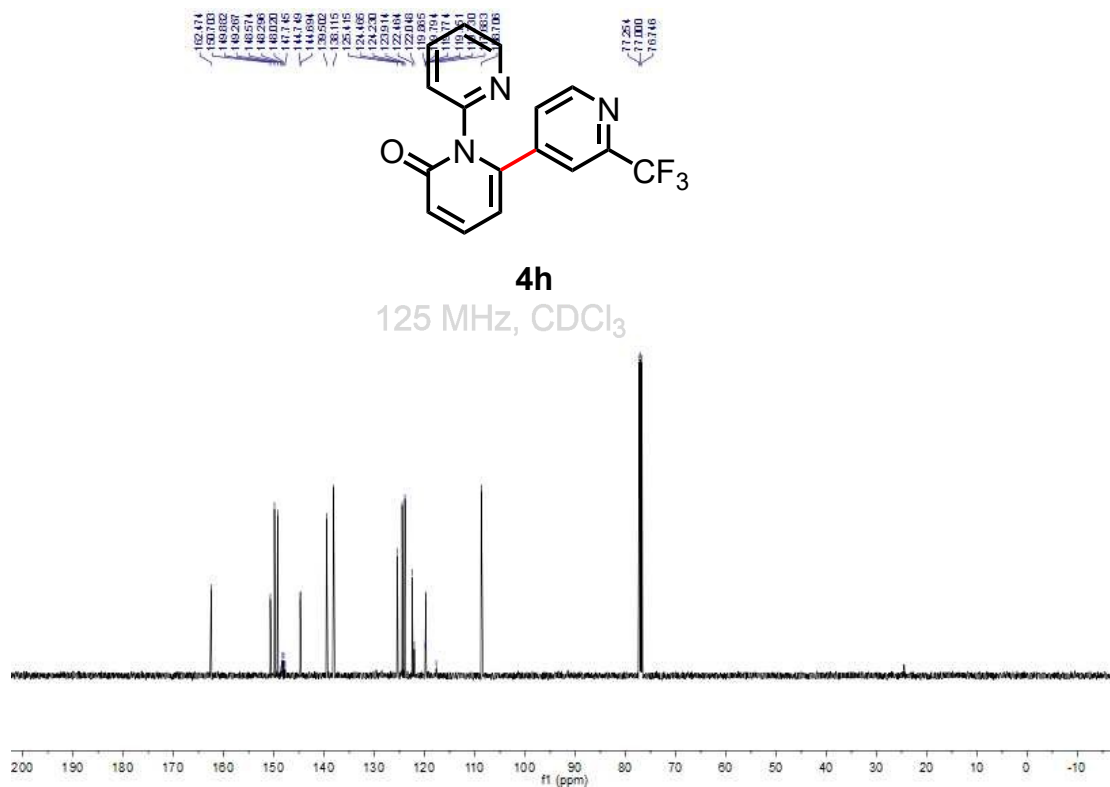

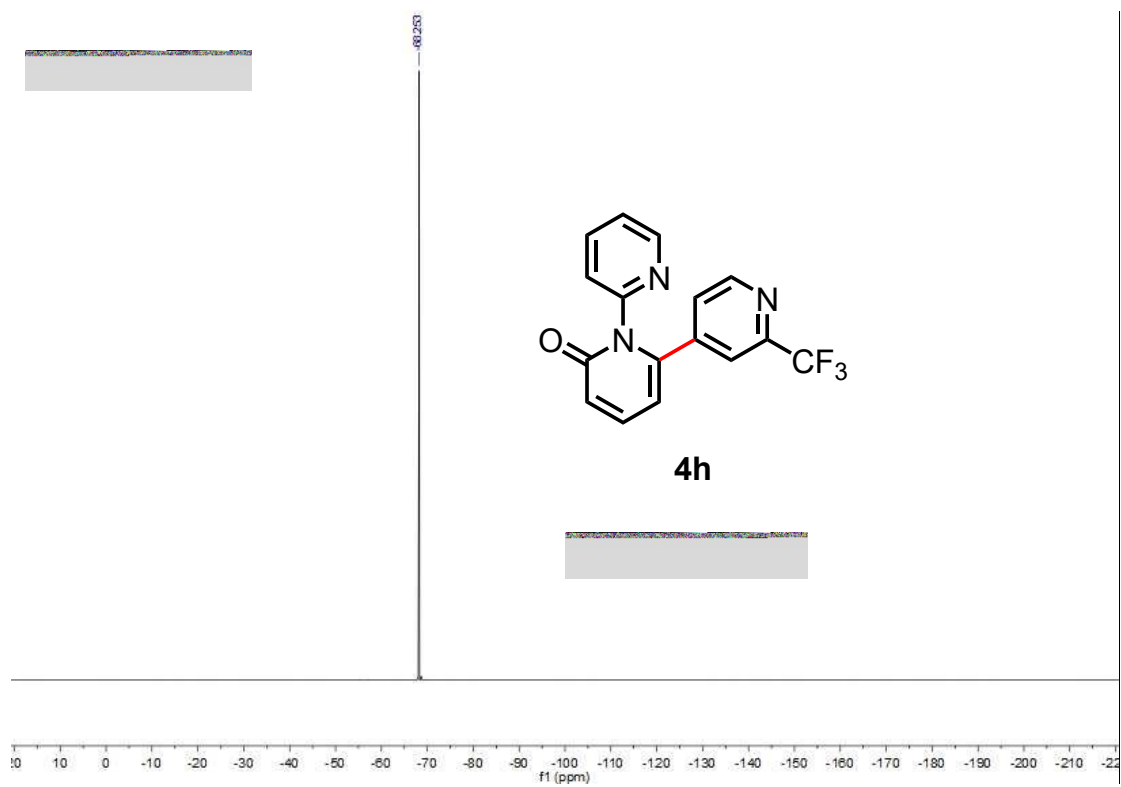

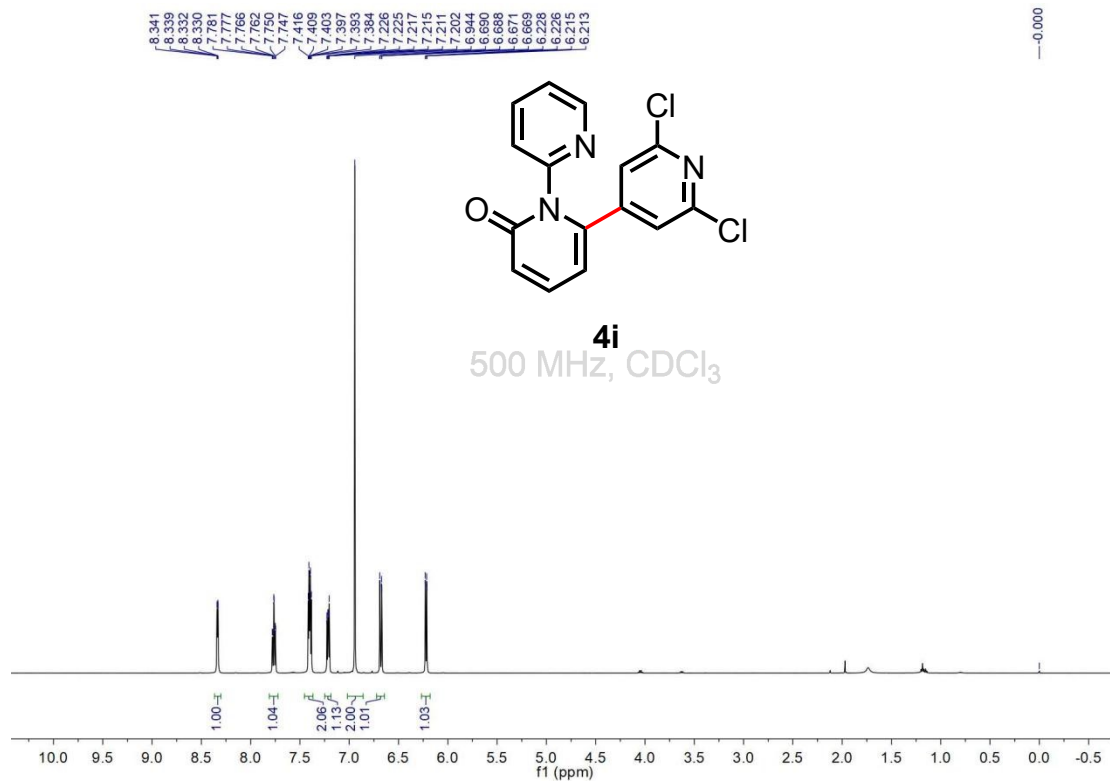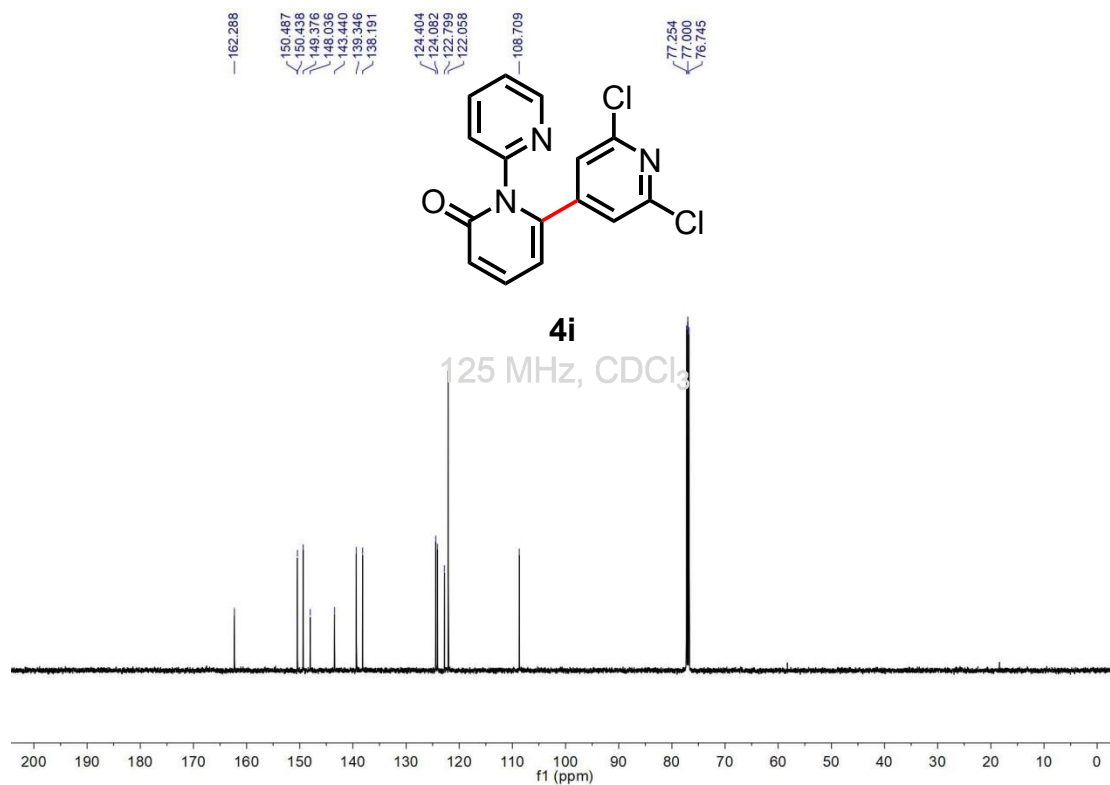

8.951  
8.348  
8.341  
8.339  
8.320  
8.316  
8.195  
8.193  
7.716  
7.712  
7.697  
7.685  
7.681  
7.427  
7.421  
7.416  
7.414  
7.413  
7.409  
7.395  
7.391  
7.291  
7.174  
7.172  
7.165  
7.163  
7.159  
7.157  
7.150  
7.144  
6.878  
6.871  
6.870  
6.663  
6.660  
6.208  
6.205  
6.194  
6.192

-0.000

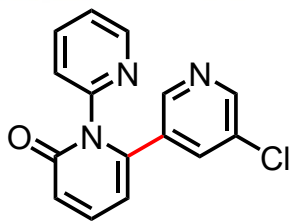

**4j**

500 MHz, CDCl<sub>3</sub>

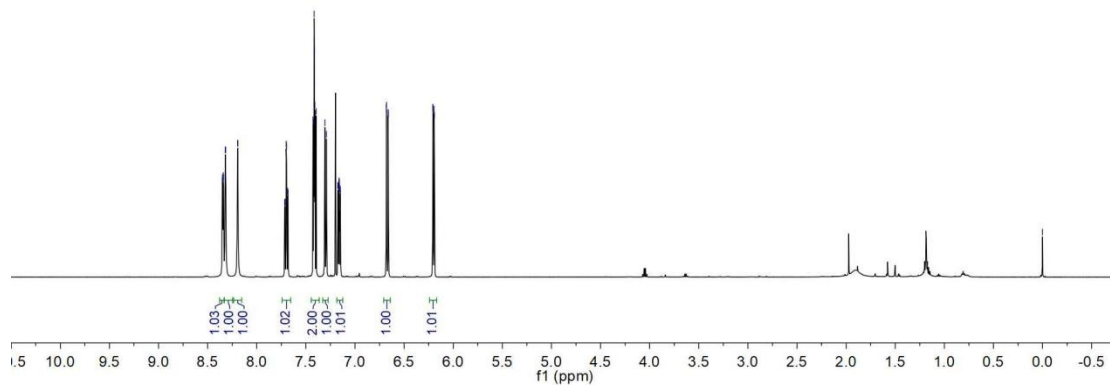

162.748  
151.045  
149.408  
148.311  
146.764  
143.914  
139.557  
138.220  
135.718  
132.267  
131.319  
124.885  
121.885  
108.615  
77.254  
77.000  
76.746

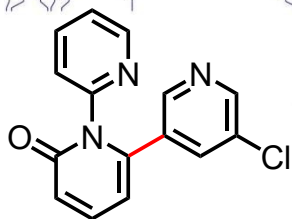

**4j**

125 MHz, CDCl<sub>3</sub>

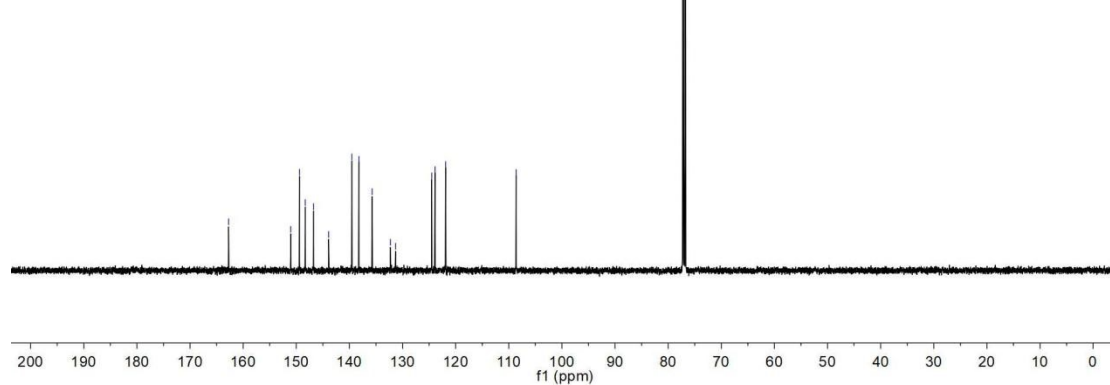

8.629  
8.627  
8.560  
8.556  
8.317  
8.316  
8.314  
8.312  
8.307  
8.306  
8.305  
8.302  
7.712  
7.708  
7.696  
7.693  
7.681  
7.677  
7.608  
7.605  
7.592  
7.492  
7.436  
7.431  
7.418  
7.325  
7.310  
7.161  
7.159  
7.151  
7.149  
7.148  
7.144  
7.136  
7.134  
6.708  
6.706  
6.689  
6.687  
6.249  
6.247  
6.235

0.000

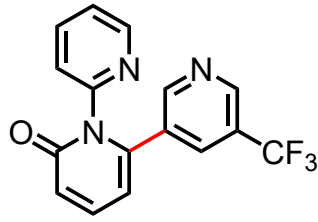

4k

500 MHz, CDCl<sub>3</sub>

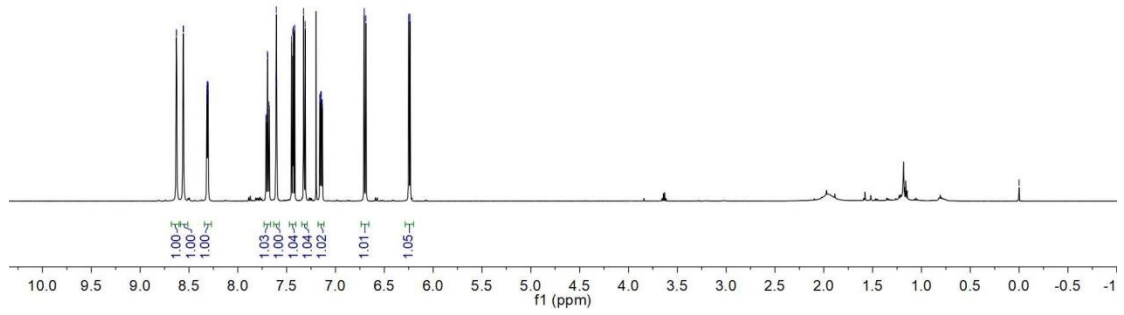

162.083  
151.927  
150.918  
149.910  
149.000  
145.970  
145.939  
145.908  
139.103  
138.103  
137.000  
135.274  
131.464  
130.250  
129.100  
129.020  
125.763  
125.497  
125.467  
125.437  
123.917  
123.671  
122.220  
121.701  
119.574  
118.714

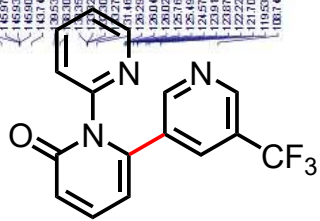

4k

125 MHz, CDCl<sub>3</sub>

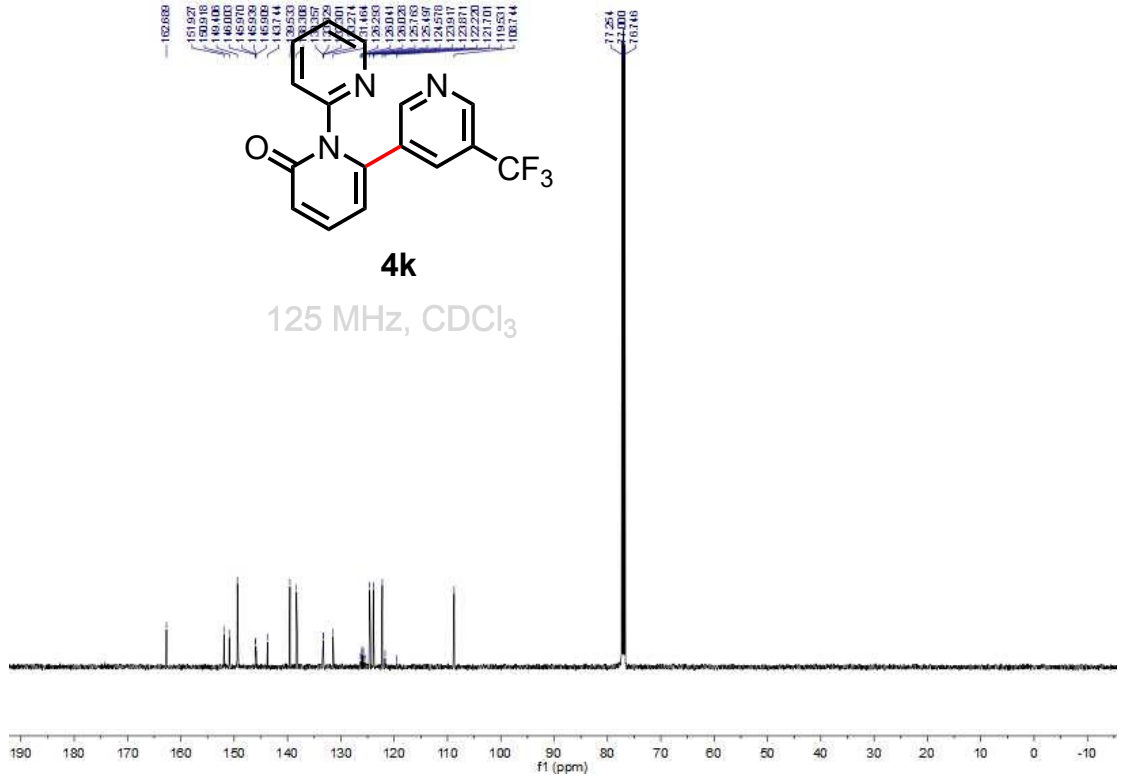



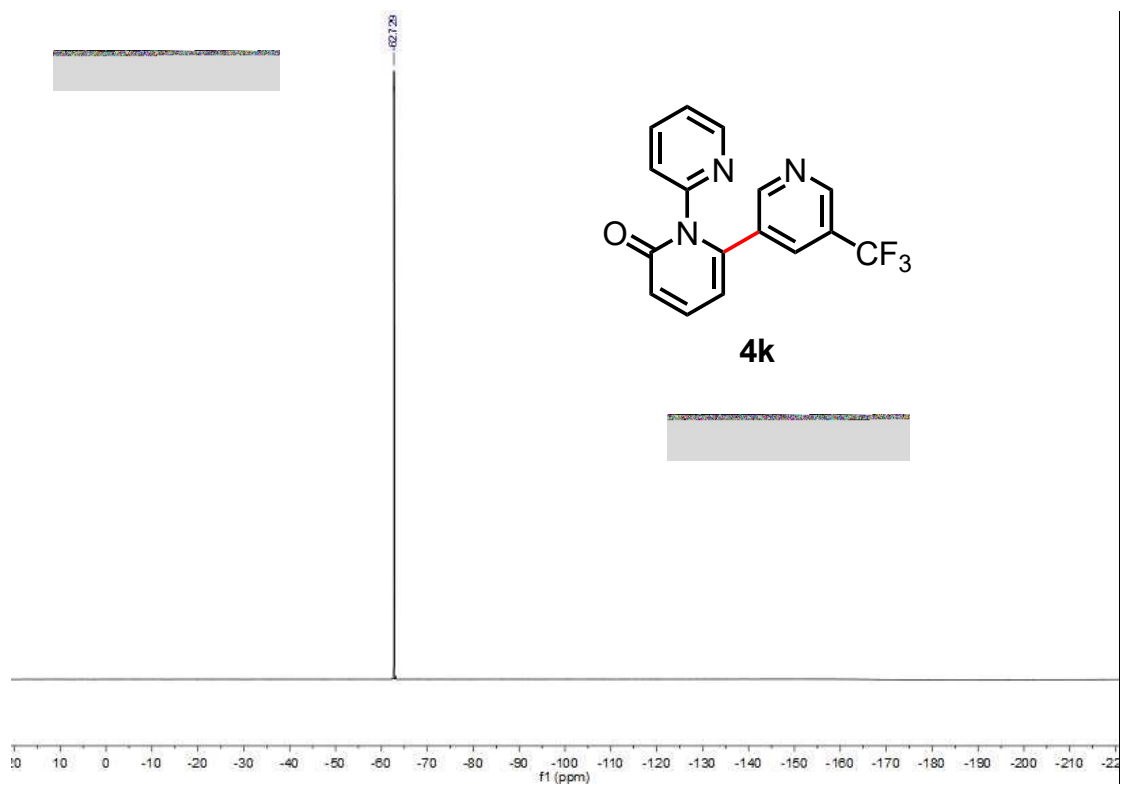

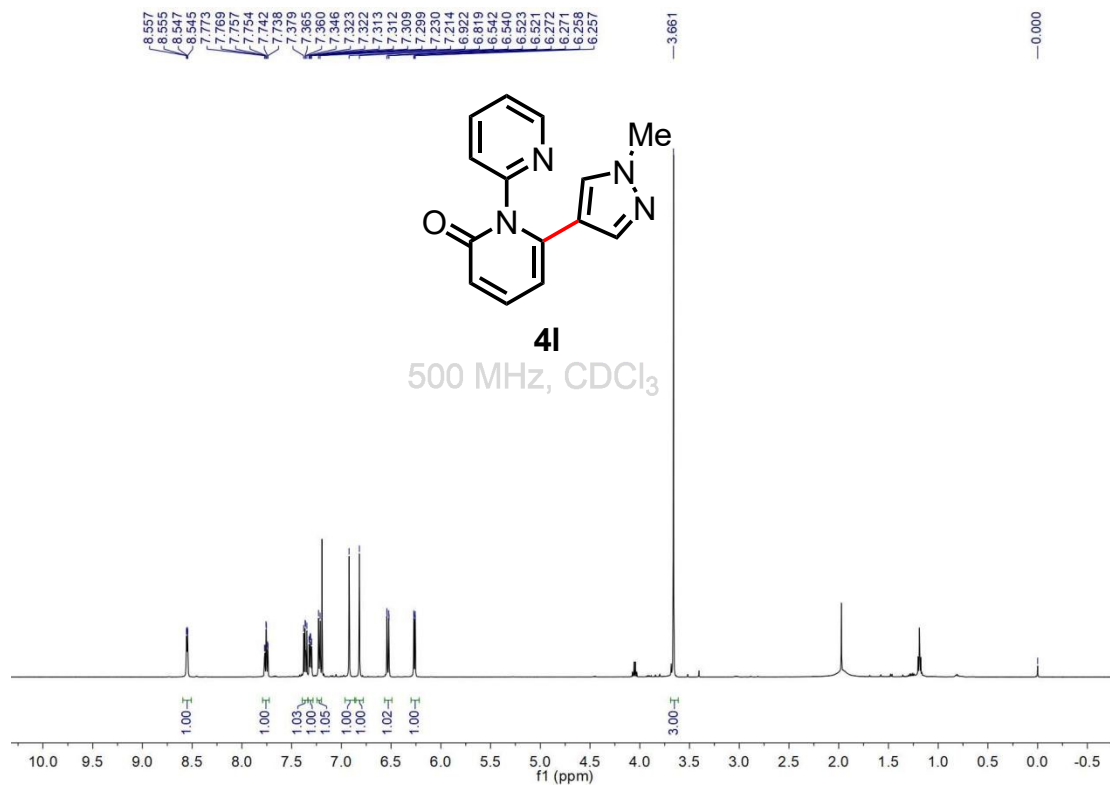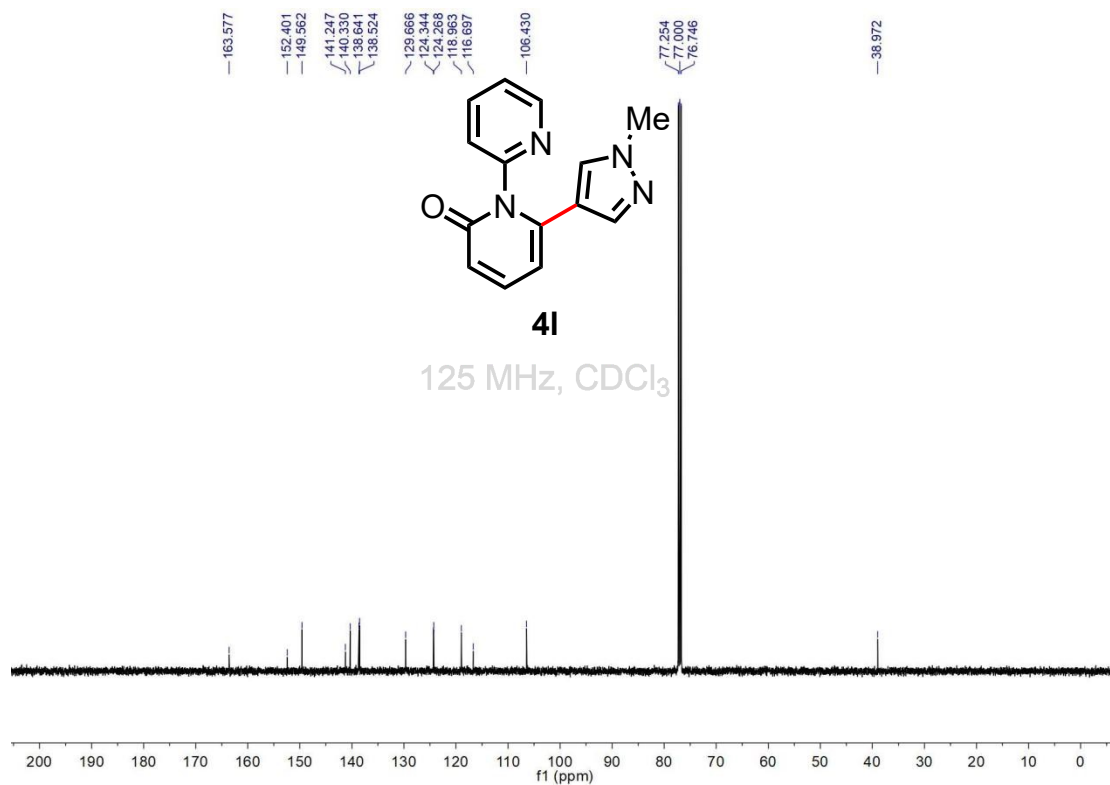

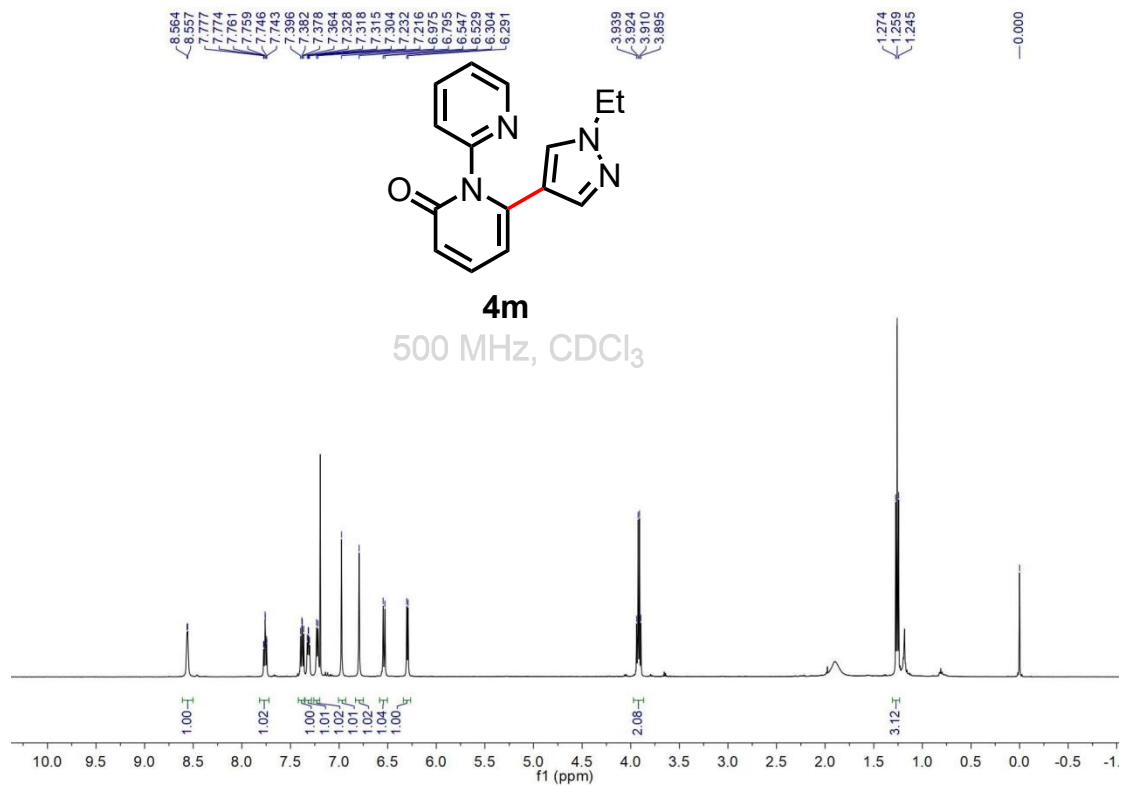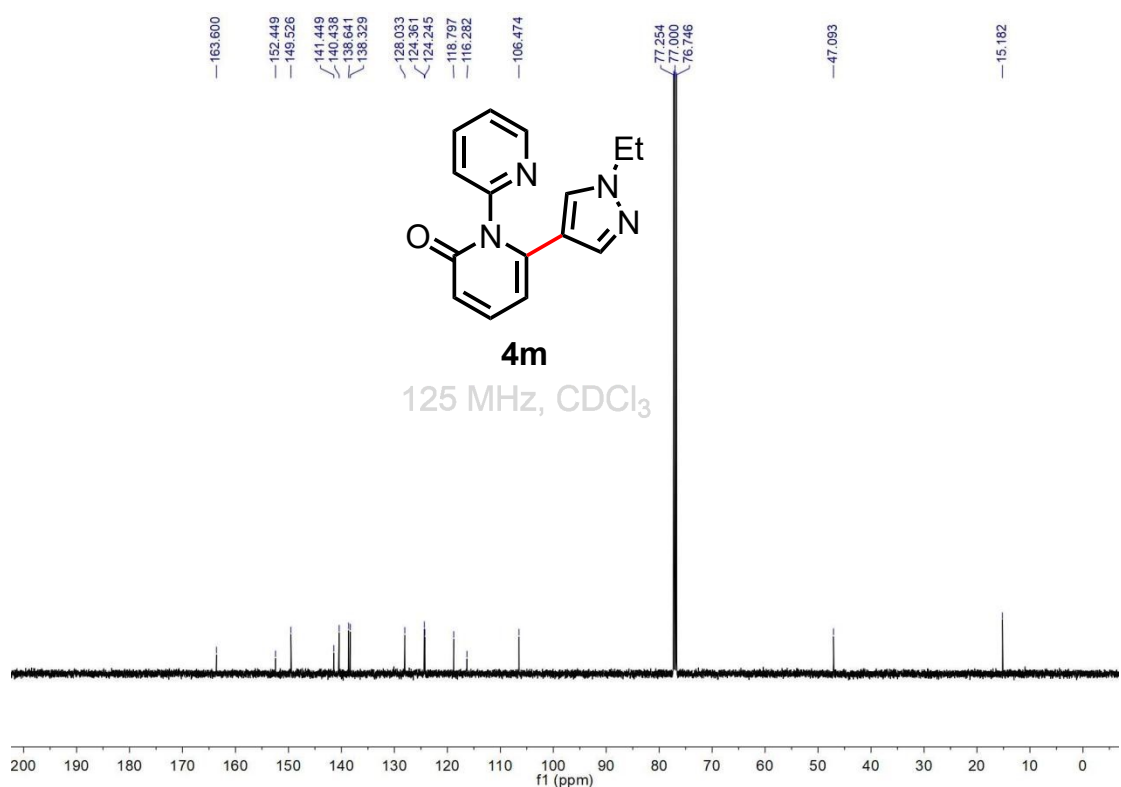

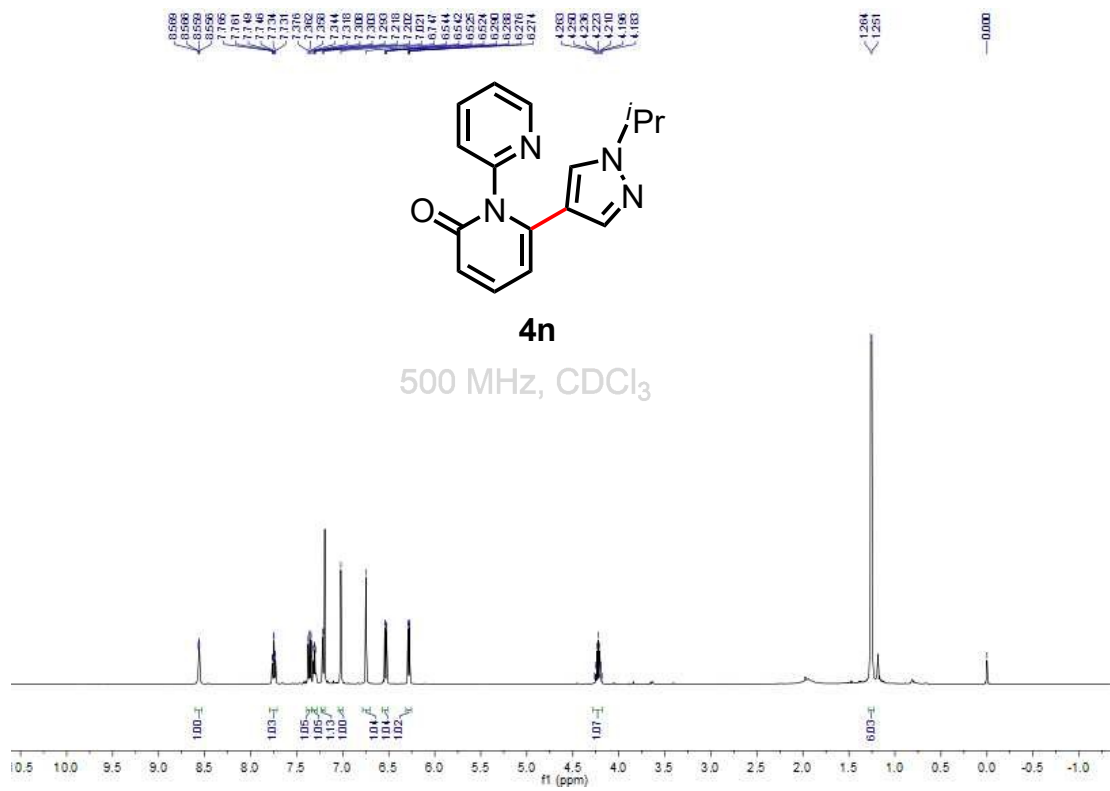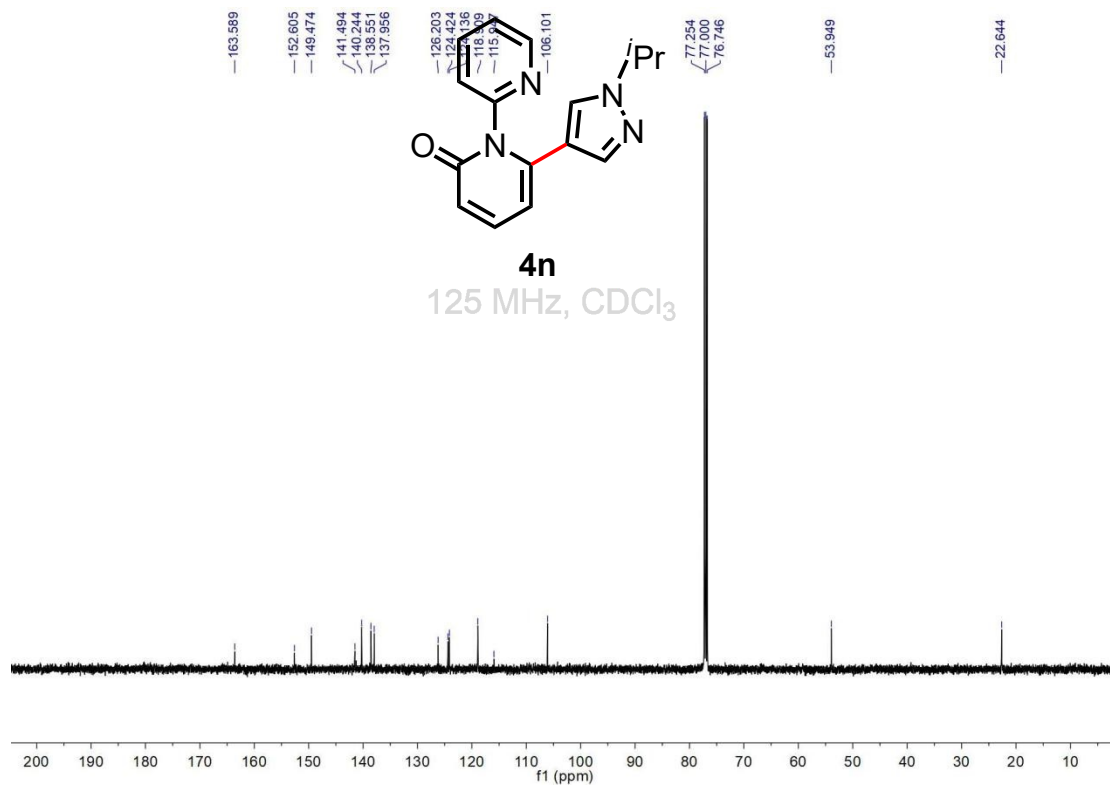



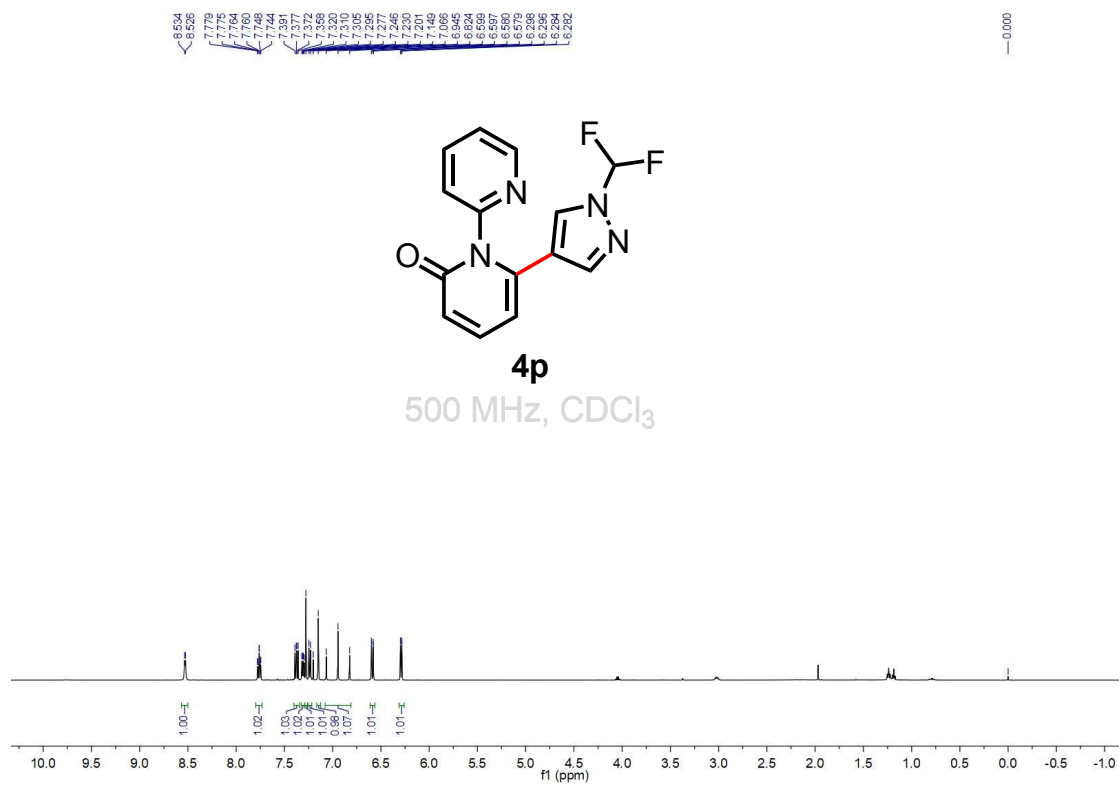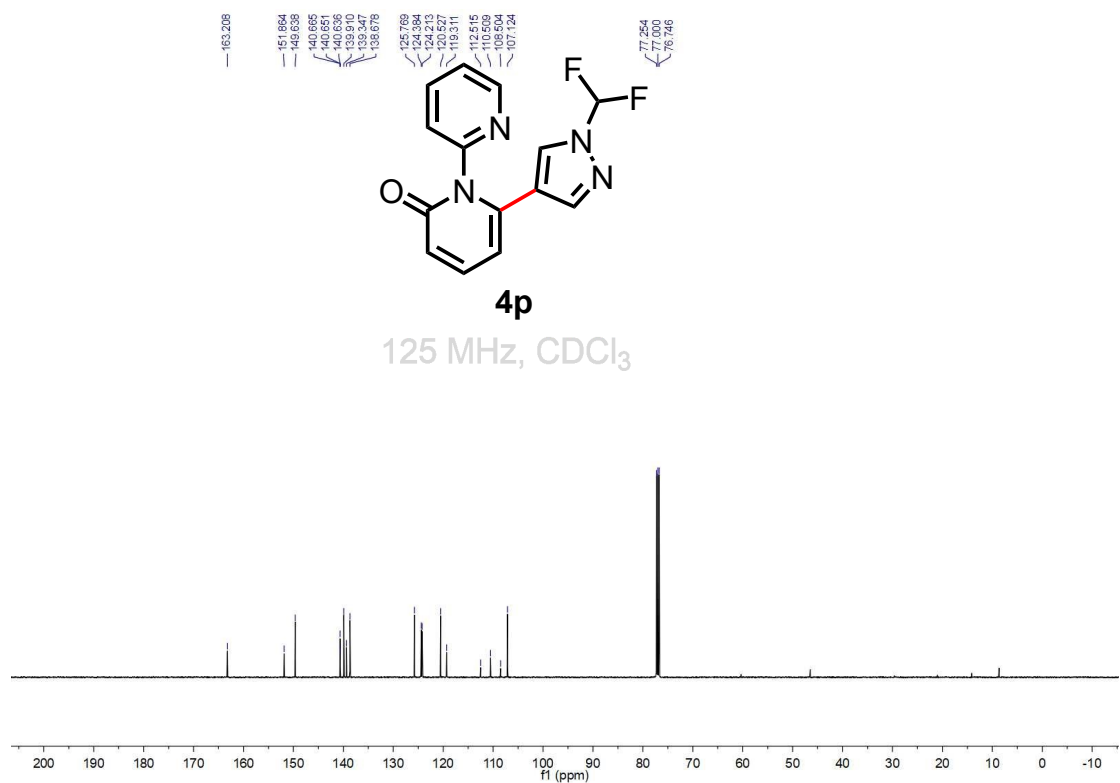

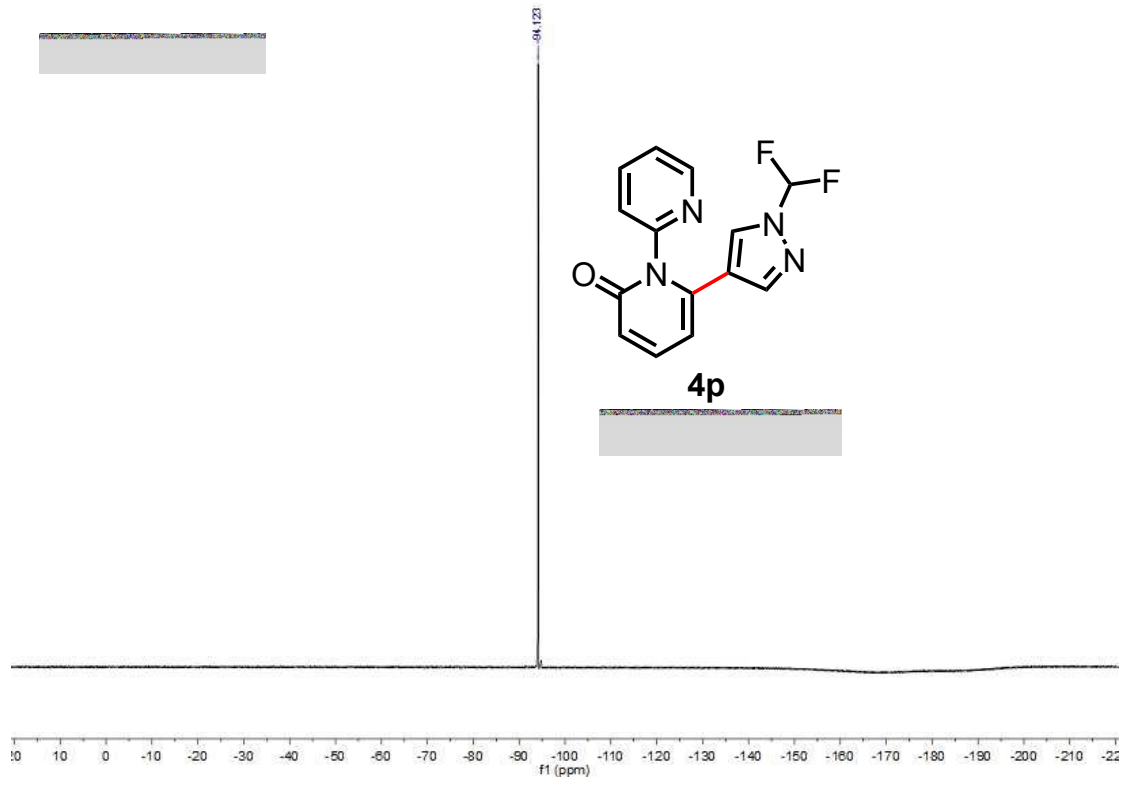

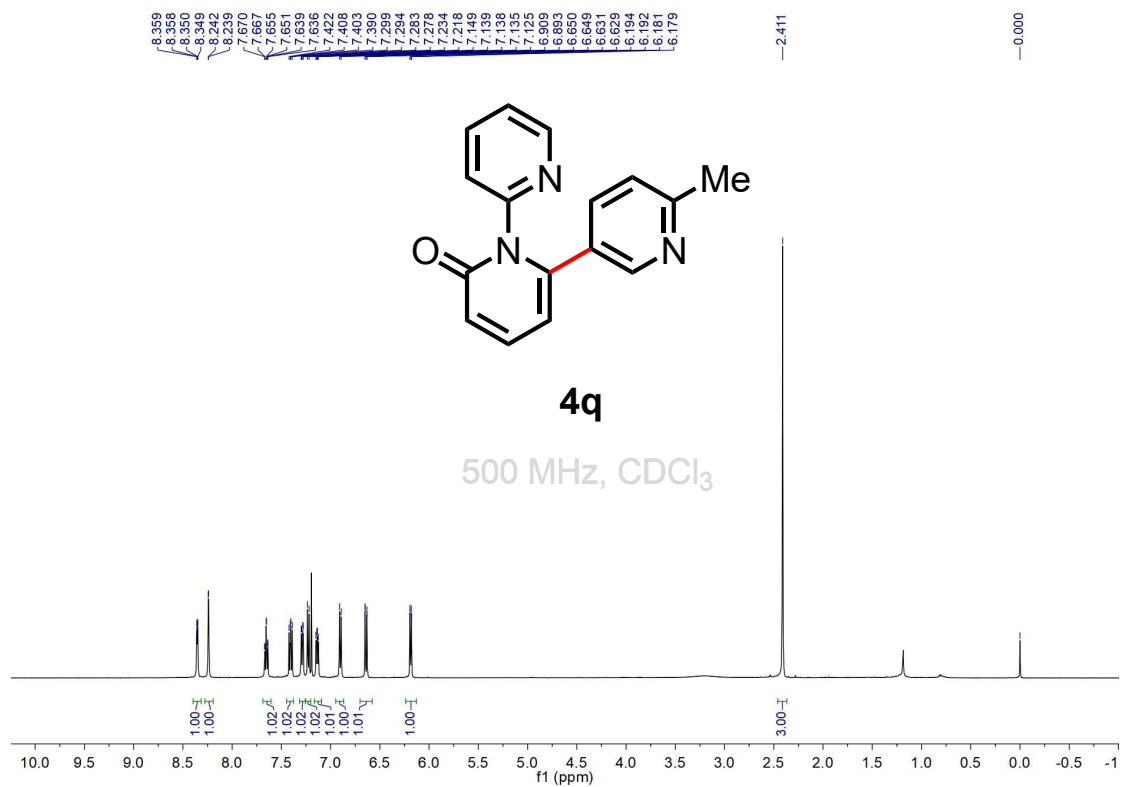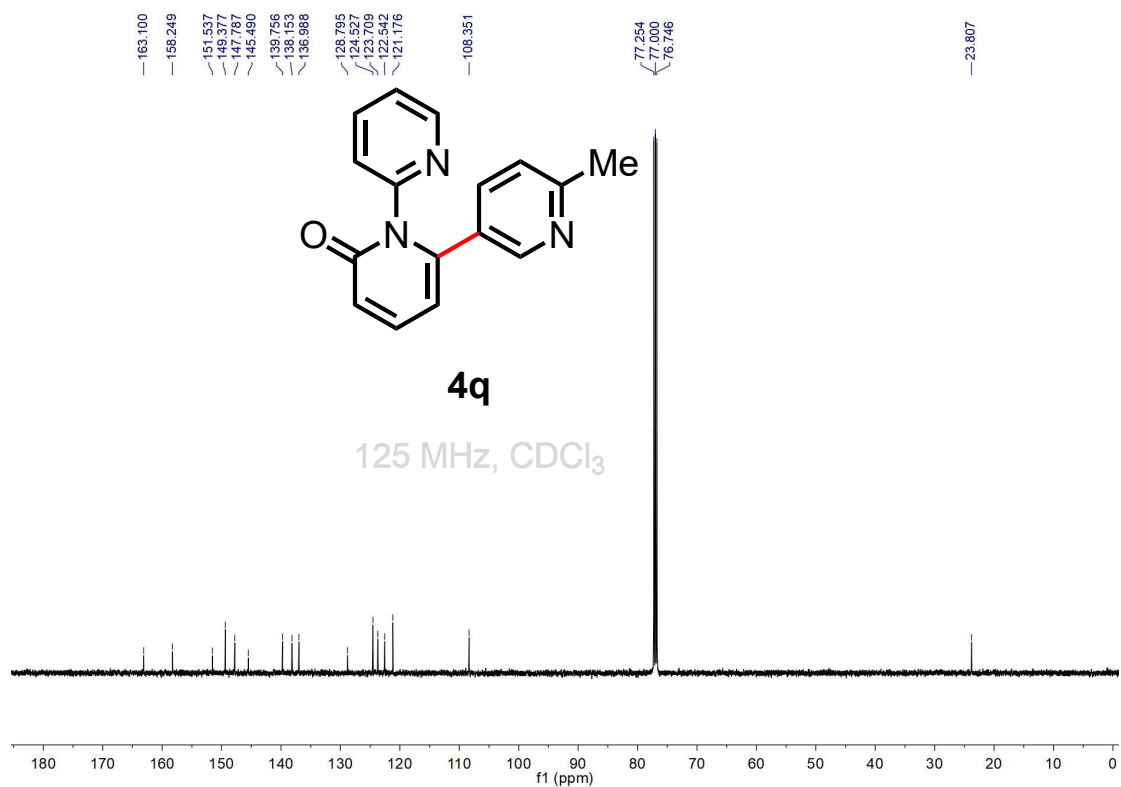



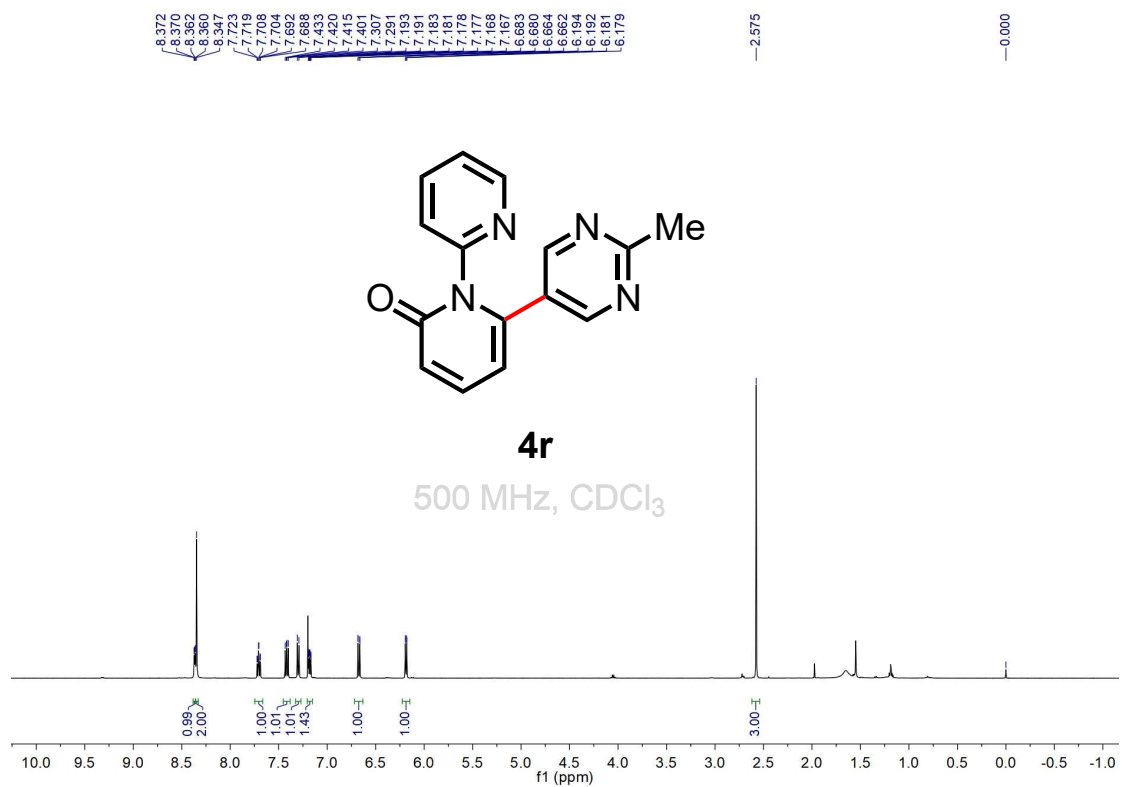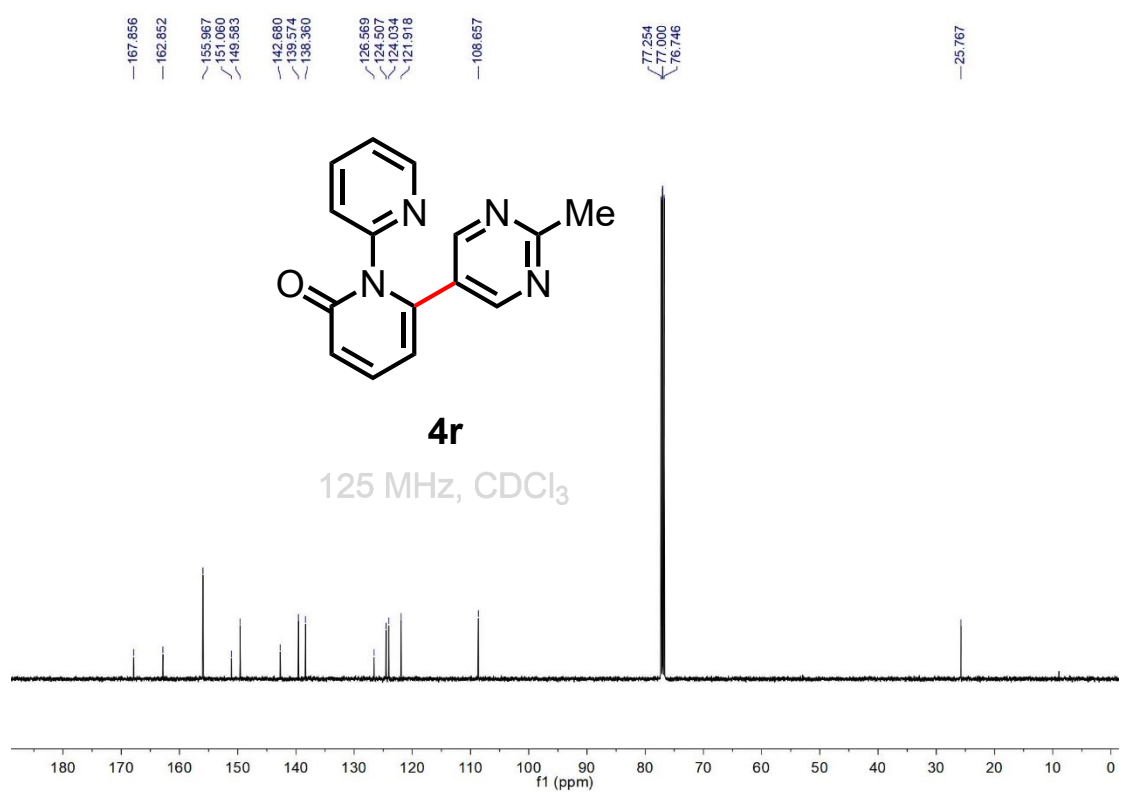

8.390  
8.324  
8.317  
7.877  
7.685  
7.682  
7.646  
7.646  
7.488  
7.485  
7.452  
7.430  
7.421  
7.416  
7.410  
7.294  
7.139  
7.132  
7.115  
7.115  
7.107  
7.090  
6.616  
6.050  
6.210  
6.199

0.000

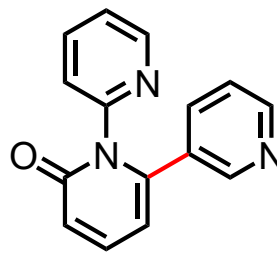

**4s**

500 MHz, CDCl<sub>3</sub>

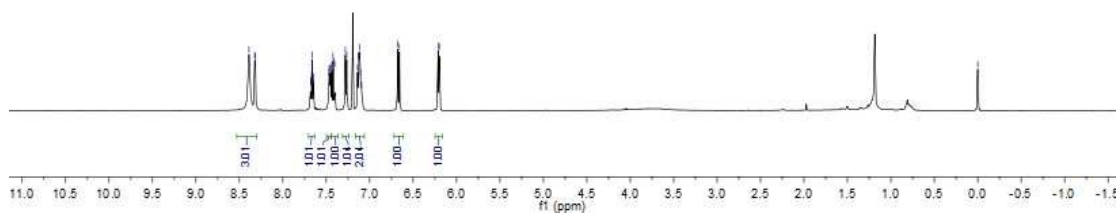

11.0 10.5 10.0 9.5 9.0 8.5 8.0 7.5 7.0 6.5 6.0 5.5 5.0 4.5 4.0 3.5 3.0 2.5 2.0 1.5 1.0 0.5 0.0 -0.5 -1.0 -1.5

162.881  
151.289  
149.268  
148.233  
147.958  
144.956  
139.615  
138.147  
137.171  
131.982  
124.574  
123.734  
123.037  
121.654  
106.503  
77.254  
77.006  
76.746

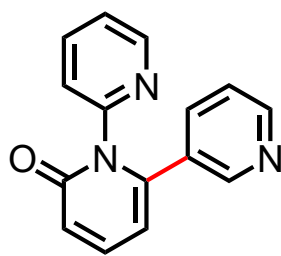

**4s**

125 MHz, CDCl<sub>3</sub>

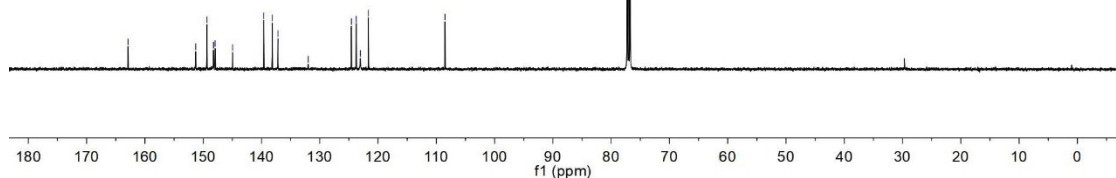

180 170 160 150 140 130 120 110 100 90 80 70 60 50 40 30 20 10 0

f1 (ppm)

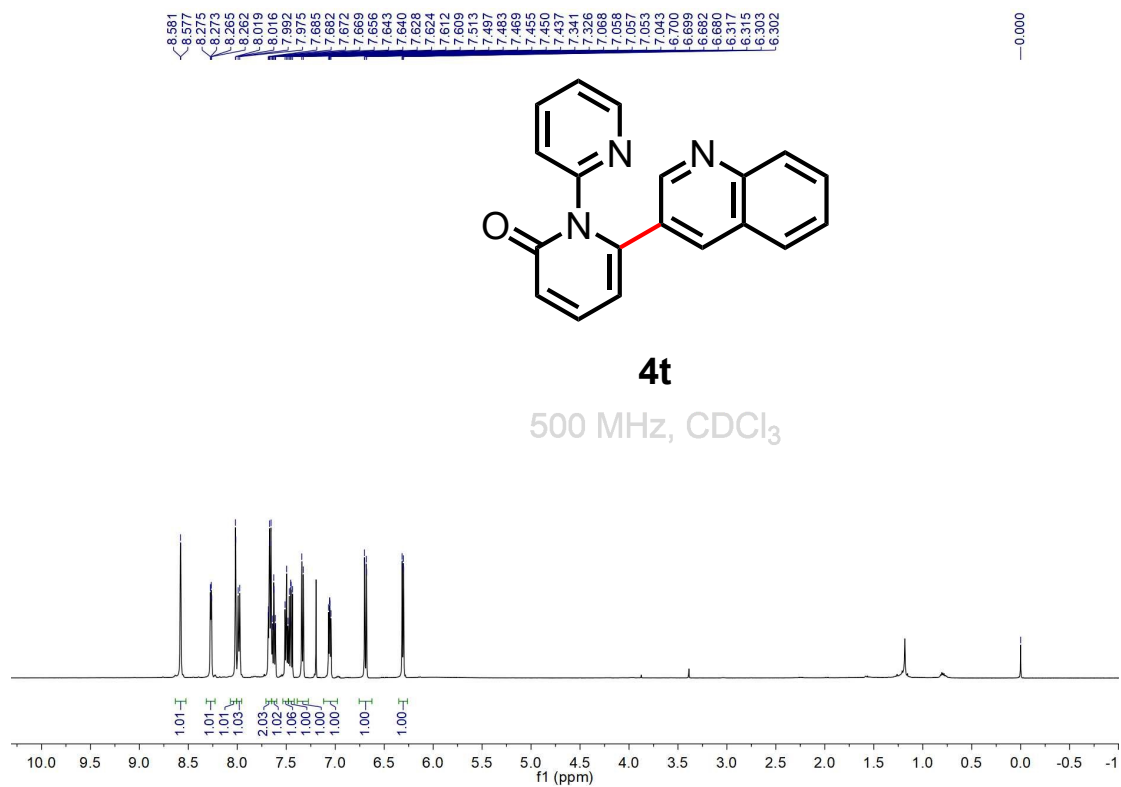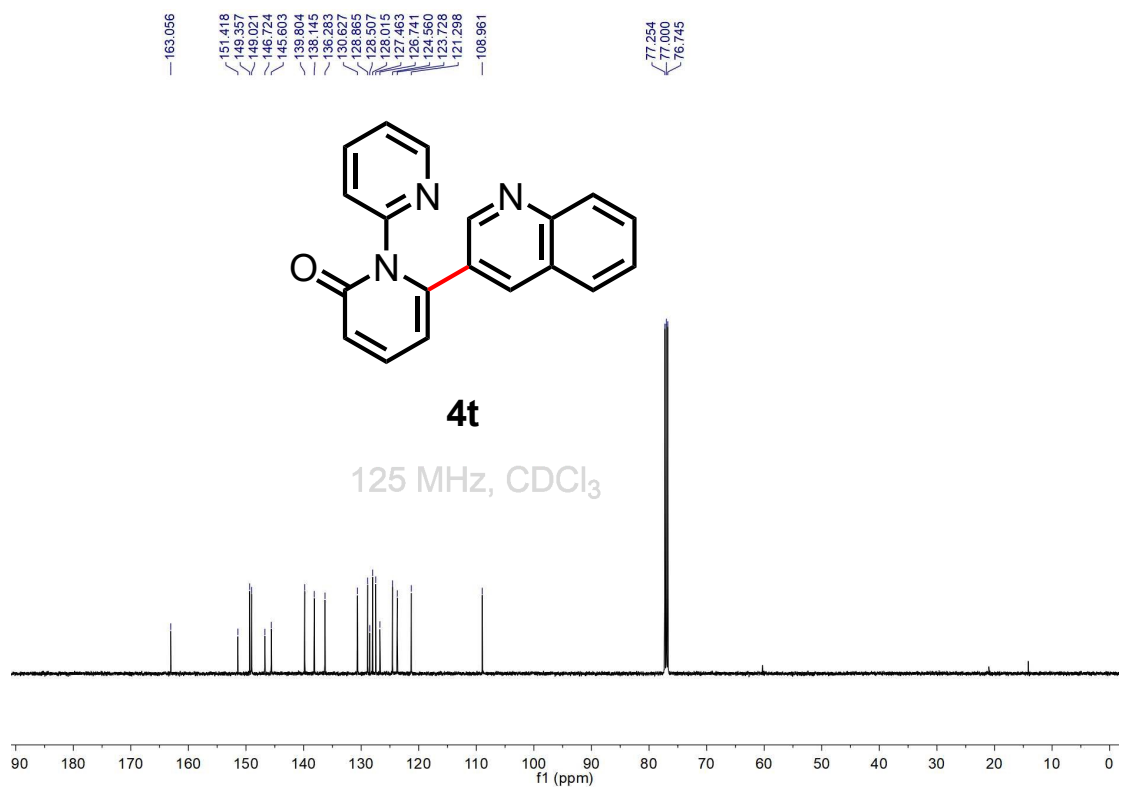

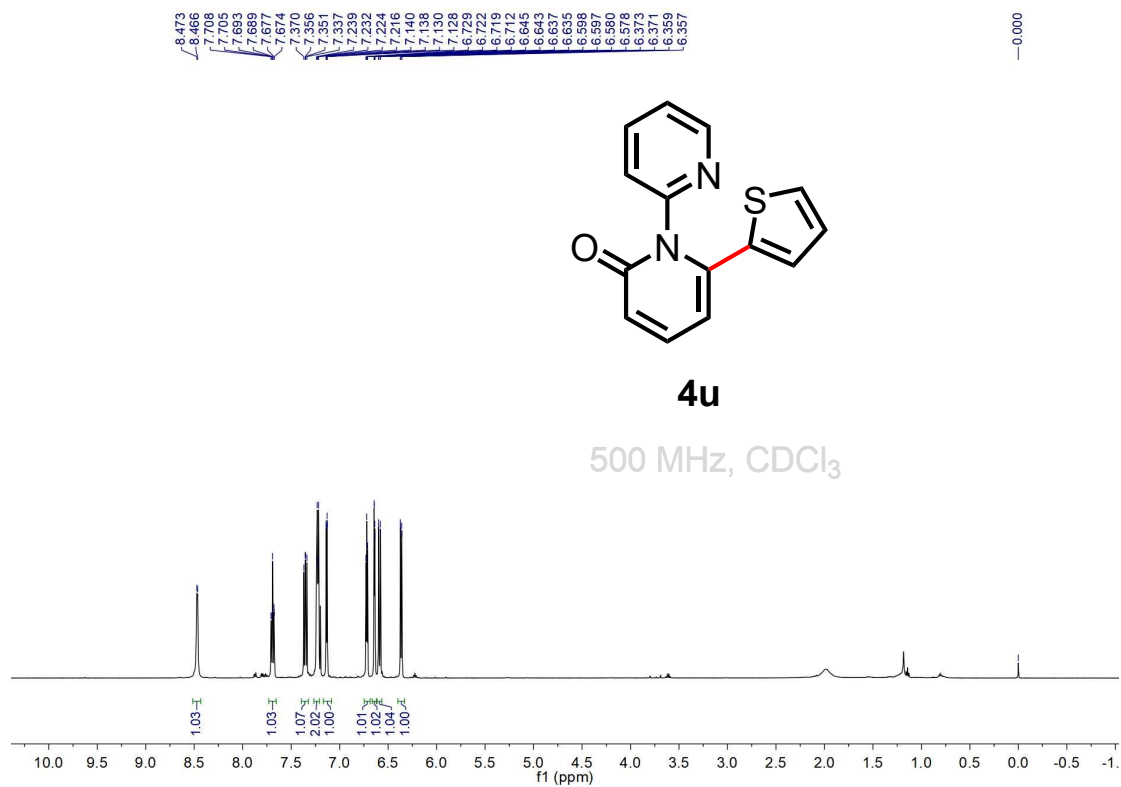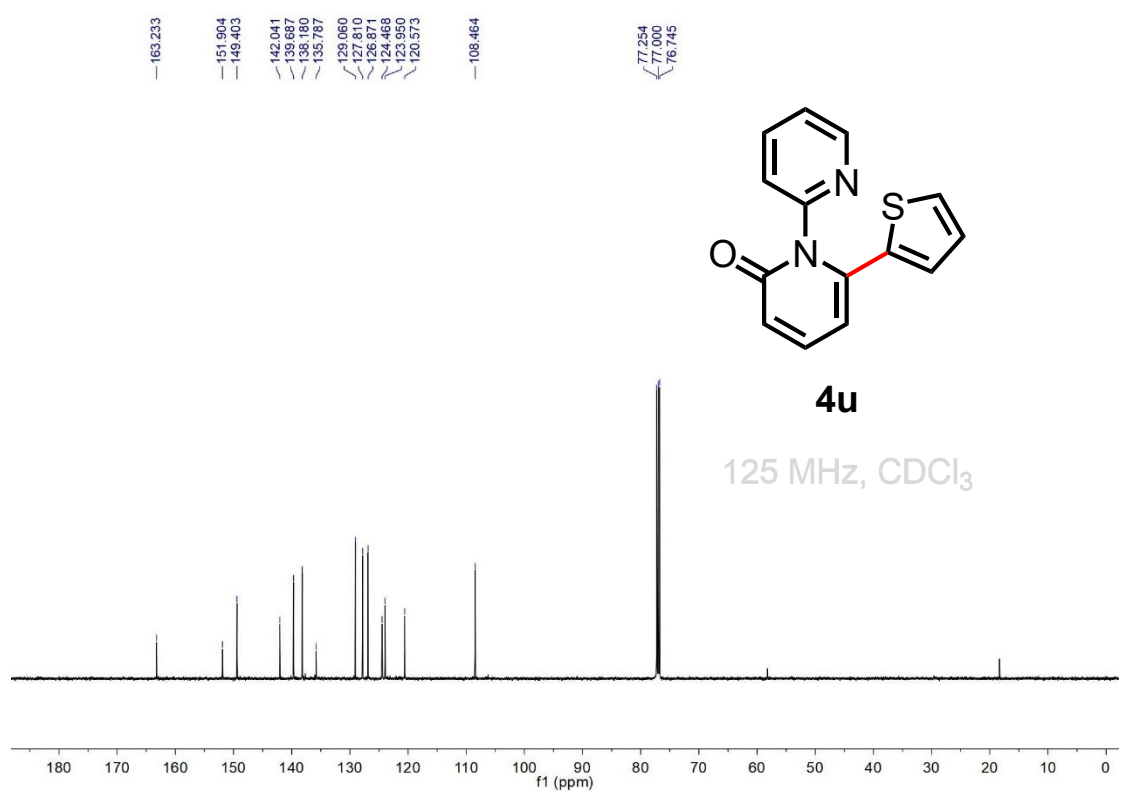

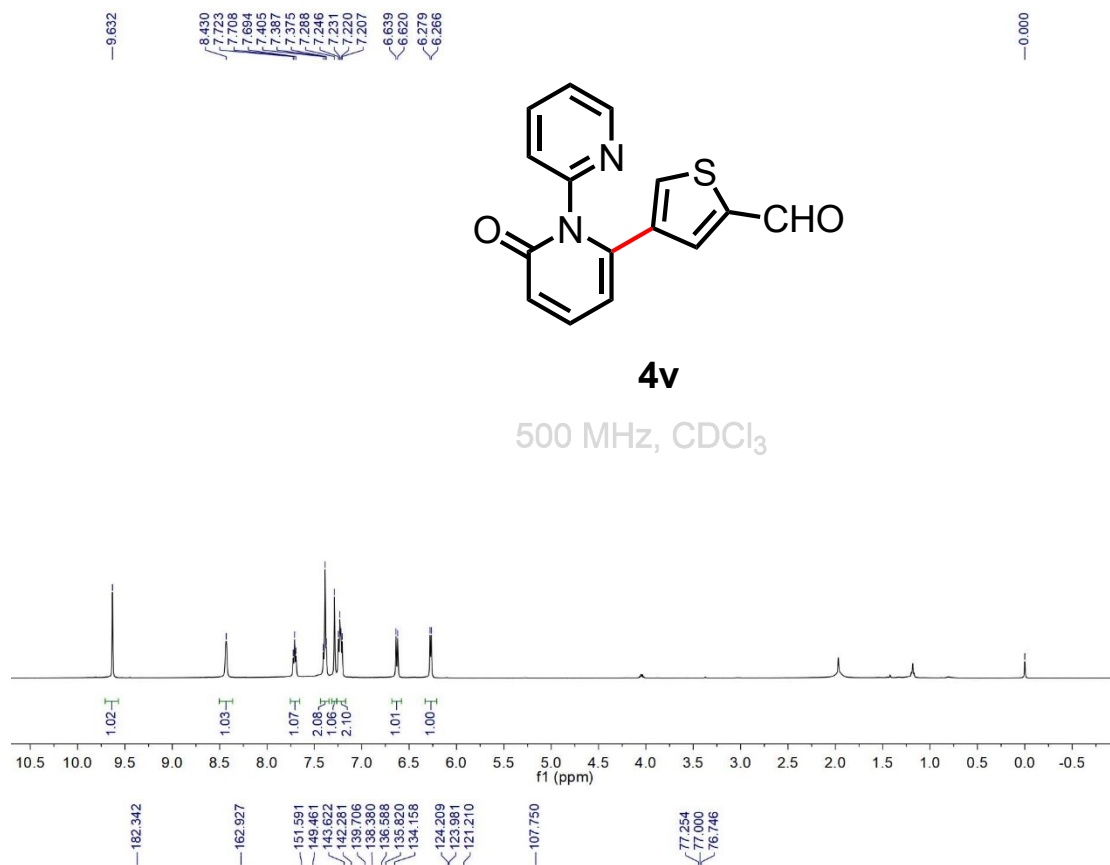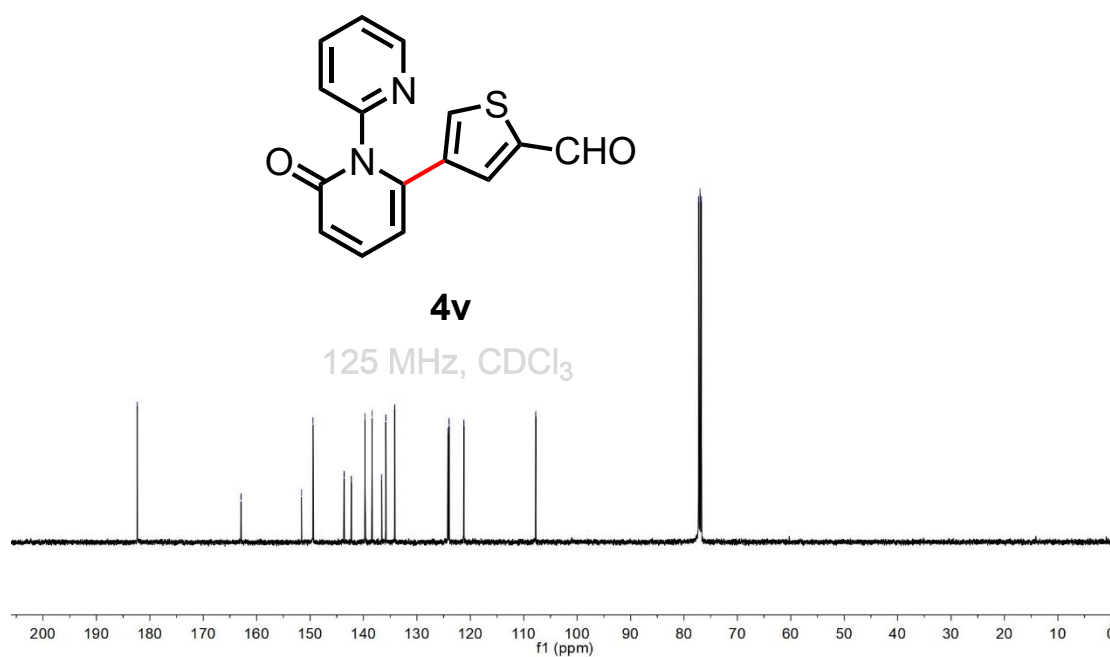

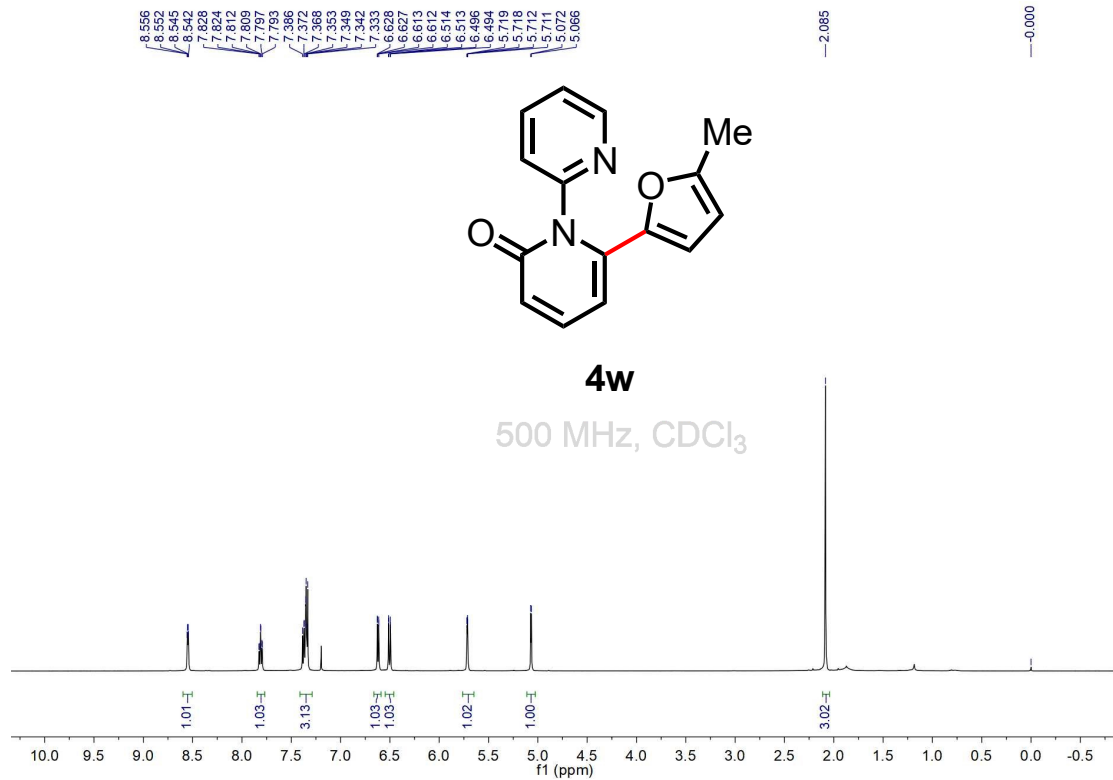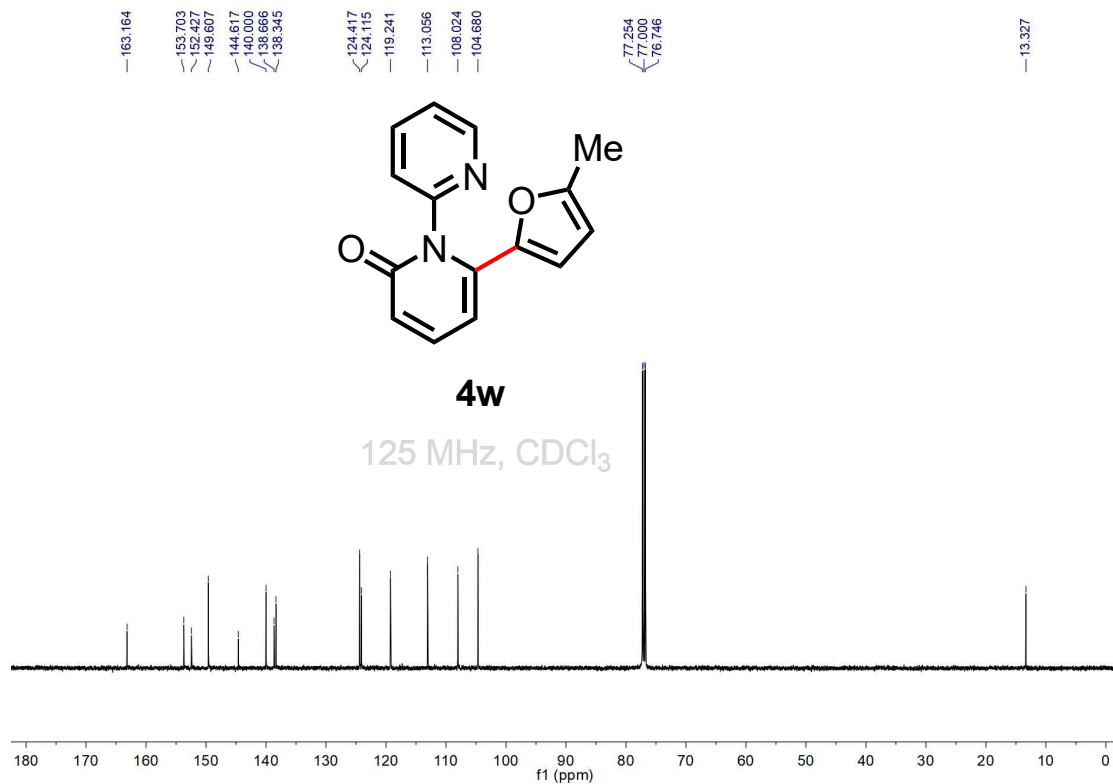

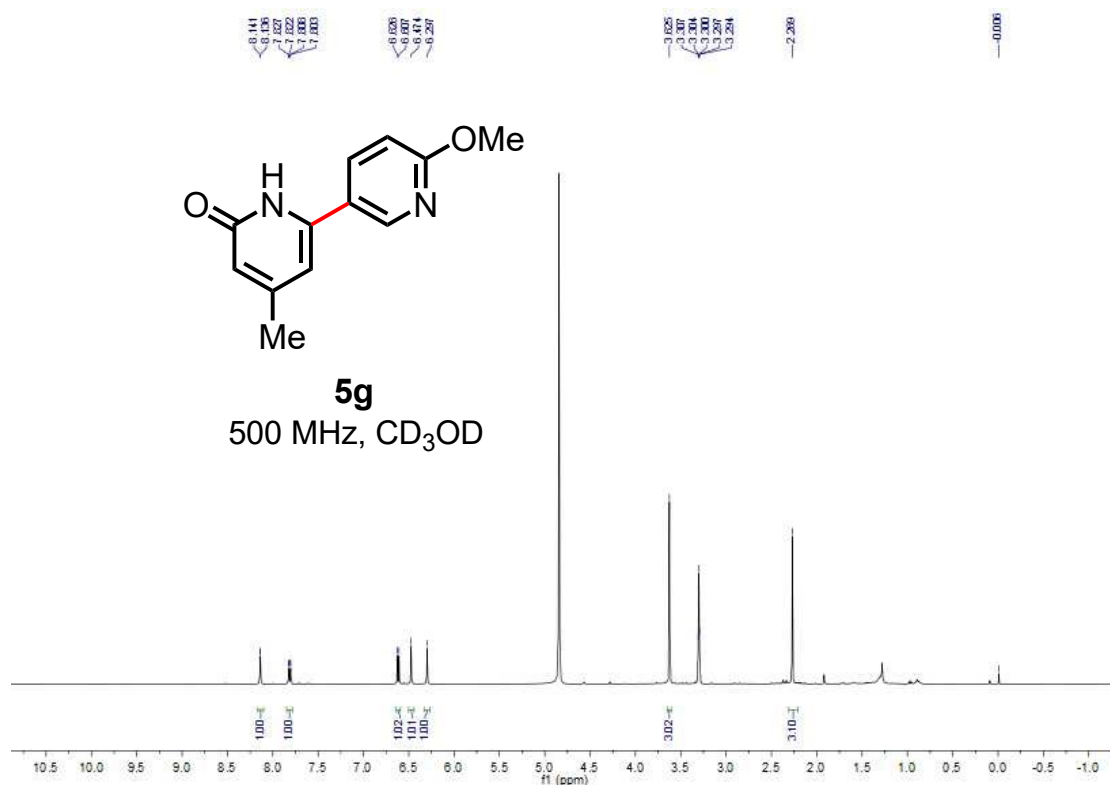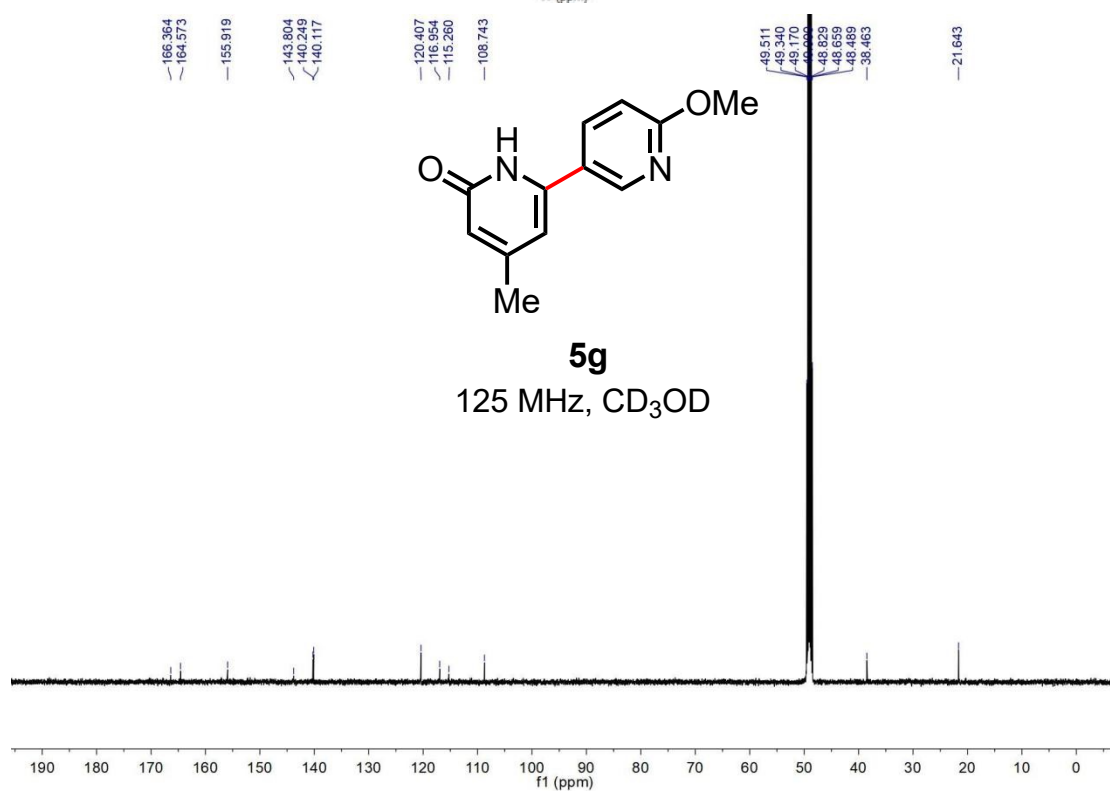

Supplement: d3ob00578j1.pdf [file d3ob00578j1.pdf]
